# Supplementary material
Source: PubMed Central journal article supplement (PMC4275152)
Supplement: jo502219d_si_001.pdf [file jo502219d_si_001.pdf]

## Supporting Information

### On the Mechanism, Reactivity and Selectivity of Ni-Catalyzed [4+4+2] Cycloadditions of Dienes and Alkynes

Xin Hong,<sup>†</sup> Dane Holte,<sup>‡</sup> Daniel C. G. Götz,<sup>‡</sup> Phil S. Baran,<sup>\*,‡</sup> K. N. Houk<sup>\*,†</sup>

<sup>†</sup>Department of Chemistry and Biochemistry, University of California, Los Angeles,  
California 90095, United States

<sup>‡</sup>Department of Chemistry, The Scripps Research Institute, 10550 North Torrey Pines  
Road, La Jolla, California 92037, United States

Email: pbaran@scripps.edu; houk@chem.ucla.edu

### Contents

|                                                                    |        |
|--------------------------------------------------------------------|--------|
| 1.                                                                 | Figure |
| S1.....                                                            | S2     |
| 2.                                                                 | Figure |
| S2.....                                                            | S3     |
| 3. Energies and Coordinates of DFT-Computed Stationary Points..... | S4     |

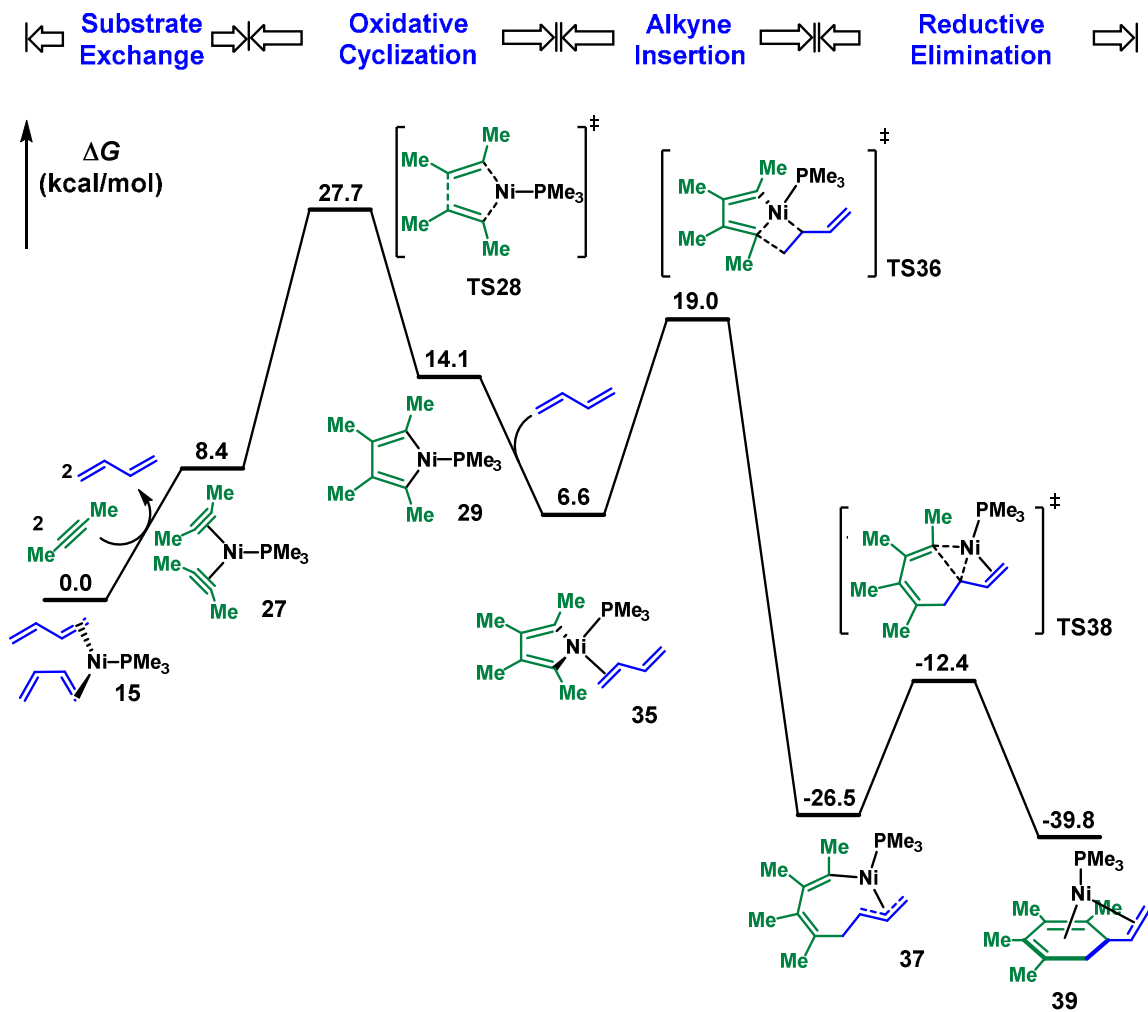

Figure S1. Free energy profile of  $[\text{Ni}(\text{PMe}_3)]$ -mediated [2+2+2] cycloaddition of two 2-butyne and one butadiene, Gibbs free energies are shown in kcal/mol.

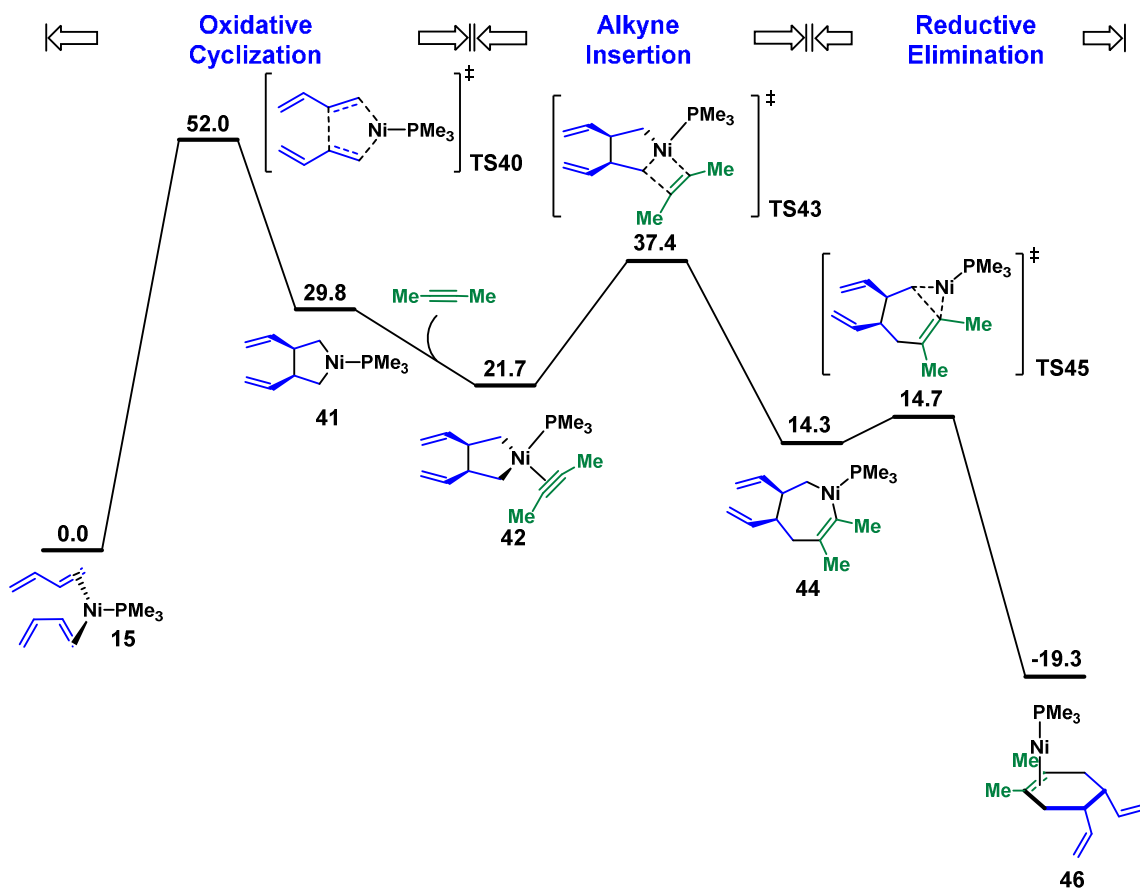

Figure S2. Free energy profile of [Ni(PMe<sub>3</sub>)]-mediated [2+2+2] cycloaddition of two butadienes and one 2-butyne, Gibbs free energies are shown in kcal/mol.

## Energies and Coordinates of DFT-Computed Stationary Points

15

G-sol = -943.639156 Hartree

|    |             |             |             |
|----|-------------|-------------|-------------|
| Ni | 0.11876500  | -0.19379700 | -0.31646900 |
| P  | -2.04007100 | -0.15567100 | 0.11284200  |
| C  | 1.39618700  | 1.31546100  | -0.88583600 |
| C  | 0.07193400  | 1.60802900  | -1.23271800 |
| H  | -0.26036700 | 1.45765400  | -2.25919500 |
| H  | -0.49014800 | 2.35857600  | -0.67959300 |
| C  | 1.61858700  | -1.62419900 | -0.27491400 |
| C  | 0.40823800  | -2.06865400 | 0.29085500  |
| H  | 1.80795300  | -1.85016700 | -1.32617800 |
| C  | 2.08119000  | 1.86797700  | 0.29727400  |
| C  | 1.67998300  | 2.90260800  | 1.05288300  |
| C  | -2.49631000 | 0.94889100  | 1.53303500  |
| H  | -1.99120200 | 0.60279700  | 2.44040000  |
| H  | -2.15605900 | 1.96847000  | 1.32831600  |
| H  | -3.57872500 | 0.95971200  | 1.70830400  |
| C  | -3.17185000 | 0.46806000  | -1.21952700 |
| H  | -4.21506500 | 0.49887700  | -0.88412900 |
| H  | -2.86494600 | 1.47284100  | -1.52421900 |
| H  | -3.10111800 | -0.18648300 | -2.09458600 |
| C  | -2.91538500 | -1.71996300 | 0.59272400  |
| H  | -2.42810200 | -2.16078700 | 1.46792800  |
| H  | -3.97108600 | -1.53893800 | 0.82527100  |
| H  | -2.85360300 | -2.44457300 | -0.22586500 |
| H  | -0.24055600 | -2.73470200 | -0.27512000 |
| H  | 0.77931600  | 3.47164000  | 0.83437600  |
| H  | 2.25874300  | 3.22741700  | 1.91299000  |
| H  | 3.01390300  | 1.36982500  | 0.55373100  |
| H  | 2.05313500  | 0.87671700  | -1.63506800 |
| C  | 2.81308500  | -1.34125500 | 0.52149400  |
| C  | 4.06906000  | -1.29989000 | 0.04874800  |
| H  | 2.64611000  | -1.17748700 | 1.58768300  |
| H  | 4.91729200  | -1.10662100 | 0.69894300  |
| H  | 4.28874500  | -1.46828400 | -1.00374900 |
| H  | 0.33310900  | -2.17750400 | 1.37416400  |

15-cc

G-sol = -943.636253 Hartree

|    |             |             |             |
|----|-------------|-------------|-------------|
| Ni | 0.13498500  | -0.09414400 | -0.49748500 |
| P  | -1.95156500 | -0.14075000 | 0.19803200  |
| C  | 1.35061200  | 1.51898100  | -0.94260300 |
| C  | -0.01115800 | 1.84377200  | -1.01562600 |
| H  | -0.49604600 | 1.89545800  | -1.98992100 |
| H  | -0.46732400 | 2.47159300  | -0.25173700 |
| C  | 1.61196100  | -1.50687100 | -0.80992000 |
| C  | 0.41982700  | -2.06510300 | -0.32280800 |
| H  | 1.74780100  | -1.47775900 | -1.89239800 |
| C  | 2.22249800  | 1.86868300  | 0.19327100  |
| C  | 1.91987800  | 2.65081400  | 1.24124600  |
| C  | -2.18612000 | 0.67475000  | 1.84924500  |
| H  | -1.57528300 | 0.16014200  | 2.59772000  |
| H  | -1.84695100 | 1.71368200  | 1.79751100  |
| H  | -3.23515100 | 0.65500500  | 2.16782100  |
| C  | -3.23203600 | 0.72425700  | -0.82998200 |
| H  | -4.22037400 | 0.69015400  | -0.35704800 |
| H  | -2.94396600 | 1.76882900  | -0.97937900 |
| H  | -3.29470500 | 0.24706100  | -1.81362300 |
| C  | -2.79960900 | -1.76528700 | 0.48798900  |
| H  | -2.22697400 | -2.35813500 | 1.20757800  |
| H  | -3.81724500 | -1.62666000 | 0.87045800  |
| H  | -2.84783600 | -2.32927400 | -0.44915400 |
| H  | -0.25488600 | -2.57446400 | -1.00908200 |
| H  | 0.95393300  | 3.13832000  | 1.34816000  |
| H  | 2.64379900  | 2.83699500  | 2.02912300  |
| H  | 3.22053800  | 1.43651000  | 0.15697100  |
| H  | 1.87105400  | 1.25845100  | -1.86272000 |
| C  | 2.85994700  | -1.36268500 | -0.04073600 |
| C  | 3.13786500  | -1.87639700 | 1.16673200  |
| H  | 3.64139000  | -0.79147100 | -0.54323000 |
| H  | 4.09853000  | -1.70488600 | 1.64356500  |
| H  | 2.42476200  | -2.48425000 | 1.71795000  |
| H  | 0.35682000  | -2.40750000 | 0.70968800  |

15-tt

G-sol = -943.644353 Hartree

|    |             |            |             |
|----|-------------|------------|-------------|
| Ni | -0.07714800 | 0.03841600 | 0.01834300  |
| P  | 2.12073800  | 0.02747900 | 0.00748400  |
| C  | -1.56602800 | 1.28960500 | -0.66814000 |
| C  | -0.29990500 | 1.64144600 | -1.16477600 |

|   |             |             |             |
|---|-------------|-------------|-------------|
| H | 0.21133600  | 2.51871100  | -0.76884200 |
| H | -0.02901400 | 1.37945400  | -2.18716900 |
| C | -0.22645400 | -1.58893700 | 1.18216100  |
| C | -1.50386600 | -1.29813800 | 0.67244600  |
| H | 0.32710400  | -2.44454200 | 0.79260000  |
| H | 0.01834600  | -1.31871100 | 2.20840200  |
| C | -2.18920100 | 1.99891900  | 0.45127600  |
| C | -3.48519700 | 1.92442000  | 0.79710400  |
| C | -2.08091700 | -2.03634000 | -0.45307600 |
| C | -3.37509200 | -2.02442000 | -0.81316900 |
| H | -3.73680200 | -2.60211100 | -1.65877300 |
| H | -4.11409800 | -1.44609800 | -0.26302700 |
| C | 3.05524100  | 1.55437600  | -0.48243000 |
| H | 2.74932300  | 1.86834400  | -1.48516400 |
| H | 2.81944600  | 2.36809500  | 0.21142800  |
| H | 4.13875100  | 1.38809500  | -0.47658400 |
| C | 2.99666000  | -0.41224200 | 1.58351800  |
| H | 4.08431900  | -0.44037000 | 1.44993400  |
| H | 2.75442500  | 0.32578500  | 2.35539700  |
| H | 2.65447800  | -1.39065300 | 1.93349300  |
| C | 2.83795500  | -1.21697600 | -1.16863100 |
| H | 2.50442000  | -0.99111100 | -2.18657800 |
| H | 3.93406300  | -1.21764500 | -1.14484400 |
| H | 2.47487400  | -2.21627100 | -0.90871500 |
| H | -1.38290100 | -2.64967700 | -1.02675600 |
| H | -2.23226200 | 0.68651100  | -1.28304400 |
| H | -4.18942800 | 1.31210500  | 0.23812900  |
| H | -3.88370800 | 2.48288400  | 1.63905400  |
| H | -1.52677100 | 2.64363700  | 1.03247600  |
| H | -2.20601200 | -0.73455500 | 1.28502500  |

TS16 (Imaginary Frequency = -355.30)

G-sol = -943.617070 Hartree

|    |             |             |             |
|----|-------------|-------------|-------------|
| Ni | 0.00590100  | 0.10950700  | -0.21548200 |
| P  | -2.12428900 | -0.06368800 | 0.12212500  |
| C  | 1.34098800  | -1.65201800 | -0.72261300 |
| C  | 0.40671400  | -1.77412300 | 0.33524900  |
| H  | 0.77493700  | -1.77327600 | 1.36332700  |
| H  | -0.43228200 | -2.45292600 | 0.18168400  |
| C  | 0.04721600  | 2.05711400  | -0.66579100 |
| C  | 1.40032700  | 1.64818700  | -0.58478000 |
| H  | -0.35562600 | 2.32146700  | -1.64287400 |
| H  | -0.38013900 | 2.63029000  | 0.15800600  |

|   |             |             |             |
|---|-------------|-------------|-------------|
| C | 2.73906400  | -1.41236900 | -0.65084400 |
| C | 3.46873900  | -1.13245500 | 0.48772600  |
| C | 2.12566300  | 1.52220100  | 0.63207000  |
| C | 3.43939300  | 1.09128400  | 0.70467900  |
| C | -3.00255600 | -1.21792700 | -1.03655900 |
| H | -2.89192900 | -0.85559800 | -2.06371100 |
| H | -2.55243800 | -2.21372500 | -0.97934300 |
| H | -4.07010500 | -1.29572800 | -0.79927800 |
| C | -2.65183800 | -0.72370300 | 1.77429400  |
| H | -3.74113000 | -0.83094500 | 1.83840600  |
| H | -2.18486800 | -1.69717000 | 1.94949300  |
| H | -2.31536200 | -0.04096900 | 2.56123900  |
| C | -3.20070200 | 1.44086400  | -0.00551800 |
| H | -3.10131400 | 1.88122900  | -1.00235000 |
| H | -4.25500600 | 1.20171300  | 0.17667800  |
| H | -2.87583100 | 2.18849300  | 0.72503600  |
| H | 0.97118800  | -1.90327200 | -1.71874800 |
| H | 1.95296400  | 1.46928800  | -1.50661400 |
| H | 4.07513900  | 1.17363000  | -0.17099400 |
| H | 3.96201000  | 1.11648900  | 1.65683800  |
| H | 3.04526200  | -1.32296900 | 1.46968100  |
| H | 4.55372400  | -1.14820300 | 0.44506700  |
| H | 1.58339700  | 1.71057400  | 1.56018000  |
| H | 3.25846900  | -1.35157200 | -1.60760200 |

TS16-cc (Imaginary Frequency = -394.48)

G-sol = -943.598163 Hartree

|    |             |             |             |
|----|-------------|-------------|-------------|
| Ni | -0.03764600 | -0.16266200 | -0.29295600 |
| P  | 2.12342200  | 0.00254000  | 0.09702400  |
| C  | -1.39768200 | -1.76533400 | -0.53349600 |
| C  | -0.45368200 | -1.91727000 | 0.52445200  |
| H  | 0.31177500  | -2.68580300 | 0.41149900  |
| H  | -0.78958900 | -1.78675200 | 1.55523200  |
| C  | -0.59683100 | 1.53888200  | -1.34070200 |
| C  | -0.82670100 | 1.88115000  | -0.00496200 |
| H  | 0.24304700  | 1.99422800  | -1.86023600 |
| H  | -1.41561700 | 1.21221000  | -1.97970200 |
| C  | -2.76305000 | -1.36383900 | -0.50739000 |
| C  | -3.51037500 | -0.89375500 | 0.55301200  |
| C  | -1.99223600 | 1.72074700  | 0.80416500  |
| C  | -3.25531900 | 1.33971700  | 0.39488500  |
| C  | 2.61839600  | -0.07171700 | 1.88554100  |
| H  | 2.17205900  | 0.77117900  | 2.42354900  |

|   |             |             |             |
|---|-------------|-------------|-------------|
| H | 2.23133600  | -0.99475900 | 2.32781800  |
| H | 3.70702400  | -0.03936300 | 2.01490500  |
| C | 3.17064800  | -1.35271500 | -0.62028900 |
| H | 4.22536300  | -1.25251600 | -0.33713300 |
| H | 2.79788600  | -2.32117700 | -0.27217500 |
| H | 3.09347600  | -1.33493400 | -1.71248400 |
| C | 3.07008100  | 1.50083700  | -0.46774700 |
| H | 2.63795600  | 2.40244600  | -0.02032900 |
| H | 4.13099300  | 1.44780600  | -0.19542100 |
| H | 2.98953800  | 1.59511100  | -1.55588400 |
| H | -0.00335500 | 2.38467400  | 0.50421200  |
| H | -3.51673600 | 1.35035800  | -0.65830400 |
| H | -4.08919300 | 1.46755500  | 1.07767200  |
| H | -3.14258400 | -0.97767700 | 1.57184500  |
| H | -4.58806100 | -0.81483000 | 0.44847000  |
| H | -3.25205300 | -1.35725900 | -1.48330600 |
| H | -1.84596200 | 1.90395400  | 1.86827000  |
| H | -1.07404300 | -2.14823200 | -1.50590900 |

TS16-tt (Imaginary Frequency = -401.65)

G-sol = -943.614283 Hartree

|    |             |             |             |
|----|-------------|-------------|-------------|
| Ni | 0.06105400  | 0.03310700  | -0.03632800 |
| P  | 2.21094000  | 0.00972000  | -0.00383600 |
| C  | -1.45648300 | 1.64015800  | -0.40782800 |
| C  | -0.13847400 | 2.02095600  | -0.05454100 |
| H  | 0.02962300  | 2.41833100  | 0.95061200  |
| H  | 0.47390600  | 2.49495000  | -0.82030800 |
| C  | -0.06998000 | -1.96803500 | -0.00769900 |
| C  | -1.38929200 | -1.63009900 | 0.38551300  |
| H  | 0.07830300  | -2.35378700 | -1.02001800 |
| H  | 0.57178600  | -2.44135400 | 0.73652600  |
| C  | -2.57681500 | 1.52218900  | 0.43983400  |
| C  | -3.79913200 | 1.02834200  | -0.00556300 |
| C  | -2.53624400 | -1.54956600 | -0.42982500 |
| C  | -3.76190200 | -1.09724600 | 0.04984200  |
| H  | -4.65171800 | -1.23152000 | -0.56011100 |
| H  | -3.94244700 | -1.14888800 | 1.12096800  |
| C  | 3.15784500  | 1.54778300  | -0.42394900 |
| H  | 2.93761800  | 1.84592200  | -1.45407200 |
| H  | 2.84906000  | 2.36390900  | 0.23605900  |
| H  | 4.23856600  | 1.39506900  | -0.32273200 |
| C  | 2.92456300  | -0.40451800 | 1.65724800  |
| H  | 4.01984800  | -0.44295200 | 1.62878500  |
| H  | 2.61338300  | 0.35008400  | 2.38663700  |



|   |             |             |             |
|---|-------------|-------------|-------------|
| H | 2.54042600  | -1.37402300 | 1.98764100  |
| C | 3.05745400  | -1.22554600 | -1.09704200 |
| H | 2.80199900  | -1.02279600 | -2.14217500 |
| H | 4.14677300  | -1.18350000 | -0.98283000 |
| H | 2.71025900  | -2.23328200 | -0.85315800 |
| H | -2.41639700 | -1.73077100 | -1.49908600 |
| H | -1.65892300 | 1.50903300  | -1.47379200 |
| H | -4.01082400 | 1.07328000  | -1.07131000 |
| H | -4.67590900 | 1.13242900  | 0.62870400  |
| H | -2.43316800 | 1.70838600  | 1.50528000  |
| H | -1.56502700 | -1.50784000 | 1.45716600  |

17

G-sol = -943.648393 Hartree

|    |             |             |             |
|----|-------------|-------------|-------------|
| Ni | -0.00134700 | 0.36487600  | 0.08985400  |
| P  | -2.09120500 | -0.21191100 | -0.00740100 |
| C  | 1.51992100  | -1.92183800 | -0.46168000 |
| C  | 0.62742100  | -1.44488200 | 0.61367400  |
| H  | 1.15529700  | -1.28886400 | 1.56329000  |
| H  | -0.18424100 | -2.16035100 | 0.79547700  |
| C  | -0.22226300 | 2.39302600  | -0.18330100 |
| C  | 1.09519100  | 1.99084700  | -0.49062100 |
| H  | -0.83054900 | 2.83606300  | -0.96779700 |
| H  | -0.46894400 | 2.72461400  | 0.82658800  |
| C  | 2.82973600  | -1.62834200 | -0.60116700 |
| C  | 3.57380600  | -0.71095800 | 0.32215900  |
| C  | 1.90436300  | 1.29200500  | 0.41700400  |
| C  | 3.27718200  | 0.79673600  | 0.04390200  |
| C  | -2.44420300 | -1.60655500 | -1.17336900 |
| H  | -2.20257400 | -1.29454500 | -2.19443800 |
| H  | -1.81340500 | -2.46381100 | -0.92309100 |
| H  | -3.49723800 | -1.90798400 | -1.13173000 |
| C  | -2.79991100 | -0.83577000 | 1.58607000  |
| H  | -3.83057100 | -1.18653900 | 1.45854800  |
| H  | -2.18438900 | -1.65626300 | 1.96503500  |
| H  | -2.78750800 | -0.03116900 | 2.32841700  |
| C  | -3.37593800 | 1.02169600  | -0.51751000 |
| H  | -3.14631100 | 1.39598700  | -1.52004500 |
| H  | -4.38055600 | 0.58291500  | -0.52172100 |
| H  | -3.36135700 | 1.87244200  | 0.17070500  |
| H  | 1.06127400  | -2.54840900 | -1.23070100 |
| H  | 3.45761900  | 0.98988400  | -1.02184200 |
| H  | 4.02094100  | 1.38796500  | 0.59852900  |
| H  | 3.33260500  | -0.92147300 | 1.37371100  |

|   |            |             |             |
|---|------------|-------------|-------------|
| H | 4.65523300 | -0.86162900 | 0.21579000  |
| H | 1.72637400 | 1.44065900  | 1.48548300  |
| H | 1.40207300 | 1.98472200  | -1.53854800 |
| H | 3.37018500 | -2.00786100 | -1.46754000 |

17-cc

G-sol = -943.647476 Hartree

|    |             |             |             |
|----|-------------|-------------|-------------|
| Ni | -0.10326000 | -0.37682200 | -0.35576400 |
| P  | 1.97272600  | 0.18548200  | 0.08516100  |
| C  | -0.98395900 | -2.18454800 | -0.37095700 |
| C  | -0.09938200 | -2.17699000 | 0.72390100  |
| H  | 0.73134200  | -2.87822100 | 0.72690200  |
| H  | -0.42538600 | -1.84851300 | 1.70946100  |
| C  | -0.71490600 | 1.29924400  | -1.20324900 |
| C  | -1.16290600 | 2.02835700  | 0.00050500  |
| H  | 0.07903200  | 1.82593600  | -1.74160000 |
| H  | -1.52799100 | 1.07667600  | -1.90070700 |
| C  | -1.99510200 | -1.21223000 | -0.54606300 |
| C  | -2.90645300 | -0.66988900 | 0.53469100  |
| C  | -2.31051000 | 1.82678500  | 0.68520800  |
| C  | -3.35418700 | 0.80431700  | 0.31775500  |
| C  | 2.38556300  | 0.30639800  | 1.88787800  |
| H  | 1.75370300  | 1.06898300  | 2.35434200  |
| H  | 2.17368100  | -0.65093700 | 2.37282500  |
| H  | 3.43809100  | 0.56681200  | 2.04949000  |
| C  | 3.26110900  | -0.99833000 | -0.52723600 |
| H  | 4.27199200  | -0.67736200 | -0.25011100 |
| H  | 3.07322300  | -1.99166800 | -0.10931200 |
| H  | 3.19874100  | -1.07188300 | -1.61780800 |
| C  | 2.63495100  | 1.79387300  | -0.55273000 |
| H  | 2.02317400  | 2.62003400  | -0.17736900 |
| H  | 3.67502800  | 1.95132200  | -0.24517400 |
| H  | 2.58098400  | 1.80545100  | -1.64575700 |
| H  | -0.68756200 | -2.75941300 | -1.25001400 |
| H  | -0.47028300 | 2.76924100  | 0.40934600  |
| H  | -3.65883200 | 0.91307000  | -0.73501500 |
| H  | -4.25743500 | 0.97675500  | 0.91510800  |
| H  | -2.44995600 | -0.76502100 | 1.52733300  |
| H  | -3.81310400 | -1.29623300 | 0.54979000  |
| H  | -2.49248200 | 2.41264300  | 1.58507200  |
| H  | -2.44086200 | -1.18081200 | -1.54102800 |

17-tt

G-sol = -943.624420 Hartree

|    |             |             |             |
|----|-------------|-------------|-------------|
| Ni | 0.10764200  | 0.05408000  | -0.03844100 |
| P  | 2.22444100  | 0.00853100  | 0.00491700  |
| C  | -1.52082900 | 1.72050100  | -0.39020600 |
| C  | -0.16444400 | 2.02225600  | 0.02018600  |
| H  | -0.04823300 | 2.38392000  | 1.04881200  |
| H  | 0.42321200  | 2.61309300  | -0.68581200 |
| C  | -0.08069000 | -1.93698600 | -0.10296400 |
| C  | -1.43448100 | -1.70869900 | 0.36311300  |
| H  | 0.00697800  | -2.27347400 | -1.14294800 |
| H  | 0.55164400  | -2.52843700 | 0.56507400  |
| C  | -2.59590300 | 1.44708200  | 0.40840100  |
| C  | -3.79988600 | 0.74690100  | -0.09299100 |
| C  | -2.55229600 | -1.49186900 | -0.39142500 |
| C  | -3.76415600 | -0.84293300 | 0.15817400  |
| H  | -4.68500700 | -1.23614000 | -0.29056900 |
| H  | -3.82871800 | -1.00403000 | 1.24165800  |
| C  | 3.17089900  | 1.59079000  | -0.15451200 |
| H  | 2.95345200  | 2.05123000  | -1.12306500 |
| H  | 2.85514900  | 2.28752700  | 0.62753100  |
| H  | 4.25073600  | 1.42140800  | -0.07330800 |
| C  | 2.92259200  | -0.68784400 | 1.57317300  |
| H  | 4.01757700  | -0.73093500 | 1.53973600  |
| H  | 2.61686200  | -0.06261200 | 2.41802000  |
| H  | 2.52650000  | -1.69455600 | 1.73330200  |
| C  | 3.03179200  | -1.03947300 | -1.28947800 |
| H  | 2.78090500  | -0.65114800 | -2.28167700 |
| H  | 4.12196200  | -1.04748400 | -1.17523600 |
| H  | 2.65261200  | -2.06234400 | -1.21857500 |
| H  | -2.48984600 | -1.61549100 | -1.47472700 |
| H  | -1.67834600 | 1.60679000  | -1.46741900 |
| H  | -3.91341400 | 0.90376400  | -1.17305600 |
| H  | -4.71693400 | 1.10463400  | 0.39179100  |
| H  | -2.49911200 | 1.58058200  | 1.48796200  |
| H  | -1.55416500 | -1.60685400 | 1.44629200  |

18

G-sol = -1099.434370 Hartree

|    |             |             |             |
|----|-------------|-------------|-------------|
| Ni | -0.29218100 | -0.46132100 | -0.31625000 |
| P  | -1.93953800 | 1.23266300  | -0.03528500 |
| C  | 1.56853200  | 1.62359100  | 0.15606600  |
| C  | 0.99444400  | 0.88323000  | -1.00441200 |
| H  | 1.76294400  | 0.40096000  | -1.60880000 |

|   |             |             |             |
|---|-------------|-------------|-------------|
| H | 0.42083700  | 1.56274400  | -1.65161600 |
| C | 1.08667900  | -1.88095000 | -0.56285800 |
| C | 2.32465100  | -1.50779900 | 0.14502700  |
| H | 0.62369300  | -2.79428200 | -0.16791800 |
| H | 1.25357700  | -1.99585500 | -1.64262600 |
| C | 2.84520000  | 1.76797900  | 0.57137500  |
| C | 4.12486700  | 1.27533900  | -0.07426400 |
| C | 3.45796800  | -1.08445800 | -0.43763500 |
| C | 4.47707600  | -0.21024900 | 0.23357500  |
| C | -2.23705500 | 1.74205500  | 1.72694600  |
| H | -2.59778000 | 0.88403200  | 2.30261300  |
| H | -1.29888300 | 2.08491000  | 2.17454600  |
| H | -2.97929900 | 2.54589400  | 1.79526300  |
| C | -1.72204400 | 2.88597000  | -0.84745500 |
| H | -2.54551200 | 3.56247700  | -0.59171500 |
| H | -0.77692300 | 3.33911800  | -0.53624200 |
| H | -1.69191400 | 2.76017700  | -1.93452200 |
| C | -3.67360600 | 0.83216400  | -0.56865000 |
| H | -3.99973700 | -0.09905800 | -0.09655300 |
| H | -4.37120600 | 1.63277300  | -0.29722900 |
| H | -3.70404100 | 0.69798800  | -1.65501600 |
| H | 0.83161000  | 2.13376700  | 0.78576900  |
| H | 4.47291400  | -0.36709700 | 1.32086600  |
| H | 5.49687300  | -0.41534300 | -0.12327000 |
| H | 4.06283800  | 1.38579800  | -1.16586200 |
| H | 4.95317500  | 1.91859900  | 0.25562500  |
| H | 3.54435400  | -1.16163400 | -1.52444000 |
| H | 2.25504500  | -1.41710100 | 1.23335800  |
| H | 2.99312500  | 2.33839500  | 1.49038000  |
| C | -1.85862700 | -2.02970600 | -0.11295500 |
| C | -1.45110700 | -1.81237400 | 1.02290600  |
| C | -1.02937400 | -1.82381000 | 2.42892900  |
| H | -1.66035700 | -2.50277400 | 3.01646000  |
| H | 0.00862700  | -2.16804700 | 2.50591300  |
| H | -1.08094200 | -0.82947800 | 2.88417400  |
| C | -2.41294000 | -2.51491600 | -1.38101200 |
| H | -1.61793900 | -2.95212300 | -1.99599600 |
| H | -3.17336900 | -3.28580900 | -1.20254100 |
| H | -2.87555900 | -1.70839500 | -1.95985300 |

TS19 (Imaginary Frequency = -313.06)

G-sol = -1099.411624 Hartree

|    |            |            |             |
|----|------------|------------|-------------|
| Ni | 0.49998800 | 0.26269100 | -0.01780900 |
|----|------------|------------|-------------|

|   |             |             |             |
|---|-------------|-------------|-------------|
| P | 2.21036100  | -1.11263000 | -0.12229400 |
| C | -1.74698300 | -0.67250600 | 1.57094300  |
| C | -0.71844200 | -1.21590400 | 0.64420200  |
| H | -1.15365300 | -1.78733600 | -0.18321700 |
| H | -0.07707400 | -1.90208900 | 1.22206600  |
| C | -0.89100200 | 1.10815700  | -1.40413200 |
| C | -2.31007300 | 0.86934800  | -1.10835700 |
| H | -0.67730600 | 2.06141400  | -1.88760400 |
| H | -0.42478000 | 0.31485000  | -2.00418700 |
| C | -3.09303700 | -0.76646200 | 1.52407900  |
| C | -3.92709700 | -1.49561500 | 0.49226400  |
| C | -2.99120000 | -0.24010900 | -1.42547900 |
| C | -4.27639800 | -0.62797500 | -0.75478900 |
| C | 2.95246900  | -1.59367700 | 1.50590300  |
| H | 3.33726300  | -0.70079500 | 2.00859000  |
| H | 2.17936700  | -2.03341500 | 2.14328400  |
| H | 3.76845000  | -2.31532200 | 1.38258300  |
| C | 1.88206000  | -2.76199900 | -0.89876300 |
| H | 2.76706200  | -3.40774600 | -0.86445700 |
| H | 1.05459700  | -3.25428400 | -0.38114000 |
| H | 1.58895100  | -2.61478700 | -1.94340800 |
| C | 3.70460800  | -0.56846500 | -1.07187700 |
| H | 4.10485700  | 0.34944500  | -0.63328000 |
| H | 4.48538100  | -1.33829600 | -1.07275500 |
| H | 3.41872900  | -0.35091200 | -2.10602300 |
| H | -1.33754000 | -0.13157400 | 2.42956800  |
| H | -4.82602700 | 0.26541800  | -0.43010900 |
| H | -4.93692300 | -1.19703100 | -1.42301700 |
| H | -3.39920700 | -2.39437600 | 0.14594900  |
| H | -4.86209100 | -1.84123100 | 0.95505900  |
| H | -2.50359200 | -1.01112300 | -2.02484100 |
| H | -2.81567400 | 1.61672700  | -0.49785500 |
| H | -3.65964300 | -0.26572300 | 2.31087300  |
| C | 1.39462800  | 1.94972200  | 0.10804300  |
| C | 0.11927600  | 2.18300400  | 0.14714000  |
| C | -0.89143300 | 3.19010300  | 0.57616500  |
| H | -0.38799900 | 3.99355600  | 1.12953600  |
| H | -1.41462700 | 3.64975900  | -0.27216500 |
| H | -1.64841800 | 2.74778100  | 1.23295400  |
| C | 2.66369600  | 2.68309900  | 0.38496000  |
| H | 3.23557600  | 2.83611100  | -0.54068200 |
| H | 2.48683400  | 3.67494300  | 0.82662800  |
| H | 3.31597100  | 2.12580300  | 1.06890100  |

G-sol = -638.520879 Hartree

|    |             |             |             |
|----|-------------|-------------|-------------|
| Ni | 0.40760600  | 0.17256300  | -0.12236600 |
| C  | -1.36496100 | -1.60741800 | 1.07677000  |
| C  | -0.43499300 | -1.61933900 | -0.06516400 |
| H  | -0.93346300 | -1.78755700 | -1.02675700 |
| H  | 0.35113700  | -2.36742500 | 0.07321700  |
| C  | 0.80828400  | 2.23905500  | -0.37072800 |
| C  | -0.53580100 | 2.02198500  | -0.05411200 |
| H  | 1.43219400  | 2.82162800  | 0.30075400  |
| H  | 1.15561600  | 2.18386100  | -1.40157500 |
| C  | -2.64041700 | -1.16551000 | 1.04805000  |
| C  | -3.26123700 | -0.55870700 | -0.17155000 |
| C  | -1.35633700 | 1.13742800  | -0.78728300 |
| C  | -2.79706900 | 0.91540500  | -0.39811300 |
| H  | -0.97047400 | -1.96502000 | 2.03011000  |
| H  | -3.01486600 | 1.47913300  | 0.51859500  |
| H  | -3.43452600 | 1.34463200  | -1.18460400 |
| H  | -3.02457600 | -1.14031600 | -1.07281700 |
| H  | -4.35439700 | -0.55099800 | -0.08281300 |
| H  | -1.12587700 | 0.99490600  | -1.84660000 |
| H  | -0.89438900 | 2.33932900  | 0.92681100  |
| H  | -3.22930300 | -1.16749900 | 1.96431900  |
| C  | 2.22651800  | -0.73173200 | -0.47322200 |
| C  | 2.32589500  | -0.09817400 | 0.58681600  |
| C  | 2.49898100  | -1.60044400 | -1.62979400 |
| H  | 2.46579400  | -1.03490100 | -2.56815700 |
| H  | 3.49377300  | -2.05561100 | -1.54221500 |
| H  | 1.75817400  | -2.40374400 | -1.69894400 |
| C  | 2.85227400  | 0.49083900  | 1.83062800  |
| H  | 2.17496700  | 0.31659900  | 2.67380300  |
| H  | 3.82487900  | 0.04756200  | 2.07976100  |
| H  | 2.98554900  | 1.57335000  | 1.72956600  |

20-cc

G-sol = -638.521976 Hartree

|    |             |             |             |
|----|-------------|-------------|-------------|
| Ni | -0.29693400 | 0.24404300  | -0.14838200 |
| C  | 0.38530200  | 2.15766000  | -0.08571100 |
| C  | -0.18227600 | 1.95656100  | 1.17143500  |
| H  | -1.06578200 | 2.51861400  | 1.45981500  |
| H  | 0.38031000  | 1.50635400  | 1.98646900  |
| C  | 0.28439900  | -1.30569000 | -1.20932100 |
| C  | 0.92436500  | -1.96561400 | -0.06107400 |
| H  | -0.56297700 | -1.86971100 | -1.60854500 |

|   |             |             |             |
|---|-------------|-------------|-------------|
| H | 0.96888200  | -1.02581500 | -2.01341600 |
| C | 1.39785500  | 1.30149000  | -0.60792900 |
| C | 2.60026600  | 0.82646000  | 0.18553200  |
| C | 2.14785400  | -1.67380900 | 0.44345600  |
| C | 3.06073200  | -0.62576500 | -0.12856800 |
| H | -0.15692000 | 2.79187100  | -0.78866200 |
| H | 0.33046400  | -2.71468900 | 0.46617700  |
| H | 3.14356000  | -0.73035800 | -1.22068600 |
| H | 4.07280600  | -0.75753000 | 0.27259700  |
| H | 2.41684000  | 0.91388500  | 1.26336300  |
| H | 3.44050600  | 1.50230600  | -0.03937500 |
| C | -2.05691400 | -0.46335800 | 0.76829700  |
| C | -2.33752300 | -0.21285400 | -0.40681400 |
| C | -2.97105200 | -0.04947100 | -1.72279400 |
| H | -2.43783400 | -0.62752800 | -2.48506000 |
| H | -4.01258900 | -0.39540500 | -1.69275200 |
| H | -2.97047200 | 0.99974000  | -2.03921900 |
| C | -2.09041000 | -0.83844400 | 2.19065900  |
| H | -1.92443700 | 0.03677400  | 2.82880400  |
| H | -3.06247800 | -1.27516600 | 2.45245600  |
| H | -1.31162800 | -1.57193000 | 2.42565900  |
| H | 1.60258300  | 1.41846800  | -1.67257200 |
| H | 2.48775600  | -2.19609500 | 1.33664100  |

20-tt

G-sol = -638.496597 Hartree

|    |             |             |             |
|----|-------------|-------------|-------------|
| Ni | -0.55736000 | 0.00017700  | -0.00092300 |
| C  | 1.15851600  | -1.56665100 | -0.65530000 |
| C  | -0.18253400 | -1.94780200 | -0.26328800 |
| H  | -0.26439500 | -2.49839500 | 0.67834500  |
| H  | -0.78614500 | -2.39331300 | -1.05492000 |
| C  | -0.18071000 | 1.94846200  | 0.25842800  |
| C  | 1.15961100  | 1.56775400  | 0.65355600  |
| H  | -0.26055100 | 2.49653300  | -0.68494100 |
| H  | -0.78515900 | 2.39680000  | 1.04784400  |
| C  | 2.27044200  | -1.50693000 | 0.13345700  |
| C  | 3.48130700  | -0.76087300 | -0.26881900 |
| C  | 2.27324200  | 1.50685100  | -0.13273700 |
| C  | 3.48211000  | 0.75897100  | 0.27233300  |
| H  | 4.40183200  | 1.21262000  | -0.11589800 |
| H  | 3.56440000  | 0.71496100  | 1.36481100  |
| H  | 2.21414100  | 1.86149800  | -1.16338200 |
| H  | 1.27595000  | -1.22940600 | -1.68889500 |
| H  | 3.56604600  | -0.71674800 | -1.36109700 |

|   |             |             |             |
|---|-------------|-------------|-------------|
| H | 4.39942900  | -1.21617600 | 0.12125700  |
| C | -2.41321100 | -0.59899200 | 0.19641700  |
| C | -2.41348700 | 0.59872500  | -0.19486100 |
| C | -3.10550000 | 1.85732600  | -0.55061000 |
| H | -2.75223800 | 2.25762700  | -1.50721300 |
| H | -4.18610100 | 1.68308900  | -0.62978900 |
| H | -2.94261000 | 2.63167100  | 0.20704500  |
| C | -3.10410000 | -1.85729900 | 0.55438000  |
| H | -4.18509000 | -1.68432600 | 0.63091900  |
| H | -2.93872000 | -2.63382300 | -0.20042100 |
| H | -2.75233100 | -2.25413200 | 1.51295600  |
| H | 2.20883400  | -1.86196700 | 1.16381100  |
| H | 1.27466400  | 1.23127300  | 1.68768800  |

TS21 (Imaginary Frequency = -206.41)

G-sol = -638.505798 Hartree

|    |             |             |             |
|----|-------------|-------------|-------------|
| Ni | -0.30890300 | 0.04072000  | -0.04662500 |
| C  | 1.75532400  | 1.63617900  | 0.80271300  |
| C  | 0.74246200  | 1.66763000  | -0.26913600 |
| H  | 1.17121700  | 1.59271800  | -1.27628900 |
| H  | 0.12476200  | 2.56639700  | -0.21484800 |
| C  | -1.07159700 | -1.92356800 | 0.07434800  |
| C  | 0.35531800  | -1.81687600 | 0.34299800  |
| H  | -1.62826400 | -2.41572300 | 0.86634900  |
| H  | -1.35517600 | -2.27258400 | -0.91836200 |
| C  | 2.93605400  | 0.98303700  | 0.77015900  |
| C  | 3.38160900  | 0.12100800  | -0.37293100 |
| C  | 1.28067800  | -1.39695700 | -0.59973300 |
| C  | 2.75519200  | -1.30941200 | -0.31230200 |
| H  | 1.50300500  | 2.17388400  | 1.71889800  |
| H  | 2.96080400  | -1.73049100 | 0.67977600  |
| H  | 3.28154200  | -1.94155600 | -1.04136700 |
| H  | 3.12578700  | 0.57340400  | -1.33978400 |
| H  | 4.47201000  | 0.00329300  | -0.35971000 |
| H  | 0.99367800  | -1.38942500 | -1.65241400 |
| C  | -2.38630000 | -0.29946300 | 0.08966700  |
| C  | -1.97321100 | 0.88311500  | -0.20034900 |
| C  | -3.64040700 | -1.03973000 | 0.40552400  |
| H  | -4.49675900 | -0.36725000 | 0.27327100  |
| H  | -3.78828700 | -1.90992600 | -0.24634700 |
| H  | -3.65337900 | -1.40043800 | 1.44188800  |
| C  | -2.52567900 | 2.24531200  | -0.42783600 |
| H  | -2.17156000 | 2.94030300  | 0.34264600  |
| H  | -2.19424900 | 2.64824600  | -1.39193000 |



|   |             |             |             |
|---|-------------|-------------|-------------|
| H | -3.62397700 | 2.25039100  | -0.41258400 |
| H | 3.57929400  | 1.00614300  | 1.64915300  |
| H | 0.69217400  | -1.96921000 | 1.36840600  |

TS21-cc (Imaginary Frequency = -232.20)

G-sol = -638.500007 Hartree

|    |             |             |             |
|----|-------------|-------------|-------------|
| Ni | 0.23797900  | -0.07413900 | -0.54177900 |
| C  | -0.05980800 | -2.01225700 | -0.70031200 |
| C  | 1.02791400  | -1.87128300 | 0.26885900  |
| H  | 1.89121100  | -2.48210900 | 0.02017000  |
| H  | 0.76528400  | -1.93947700 | 1.32345400  |
| C  | -0.94600900 | 1.37723800  | -1.07458700 |
| C  | -1.55137200 | 1.86675200  | 0.18825400  |
| H  | -0.39510900 | 2.16486900  | -1.59667200 |
| H  | -1.68401600 | 0.94501200  | -1.76084100 |
| C  | -1.34561700 | -1.50415800 | -0.53634200 |
| C  | -2.14329300 | -1.29142500 | 0.72690200  |
| C  | -2.49230300 | 1.25935200  | 0.93743500  |
| C  | -3.12036800 | -0.08190800 | 0.64527100  |
| H  | 0.21660500  | -2.37680100 | -1.68951400 |
| H  | -1.14972400 | 2.80457000  | 0.57768100  |
| H  | -3.58618700 | -0.09320800 | -0.35271600 |
| H  | -3.93394000 | -0.25755200 | 1.35830300  |
| H  | -1.49850000 | -1.19121400 | 1.60752000  |
| H  | -2.74803700 | -2.20022100 | 0.87953400  |
| C  | 2.14584400  | -0.18939600 | 0.36800400  |
| C  | 1.66821200  | 0.96913100  | 0.04885700  |
| C  | 2.10899400  | 2.38998600  | 0.08067800  |
| H  | 1.43443000  | 2.98950200  | 0.70340100  |
| H  | 3.12809600  | 2.50383100  | 0.47579500  |
| H  | 2.08026700  | 2.82625500  | -0.92482300 |
| C  | 3.42310500  | -0.76295000 | 0.88771400  |
| H  | 3.92847700  | -1.38663000 | 0.13915400  |
| H  | 4.10143700  | 0.05599400  | 1.15545300  |
| H  | 3.26967400  | -1.38229500 | 1.78063200  |
| H  | -2.80678900 | 1.74431500  | 1.86040100  |
| H  | -1.96838700 | -1.54343500 | -1.43150600 |

TS21-tt (Imaginary Frequency = -207.21)

G-sol = -638.487256 Hartree

|    |             |            |             |
|----|-------------|------------|-------------|
| Ni | -0.42196900 | 0.16991800 | -0.06928200 |
| C  | 1.53952200  | 1.64994400 | 0.34143500  |

|   |             |             |             |
|---|-------------|-------------|-------------|
| C | 0.22484600  | 2.01841100  | -0.16788500 |
| H | 0.20211300  | 2.32336200  | -1.22118200 |
| H | -0.33395700 | 2.71894400  | 0.45565100  |
| C | -0.66450900 | -1.90933400 | -0.02610500 |
| C | 0.72241200  | -1.66587100 | -0.42514100 |
| H | -0.79143800 | -2.28970400 | 0.98831400  |
| H | -1.21195100 | -2.50149200 | -0.75488900 |
| C | 2.62356600  | 1.25933500  | -0.37334800 |
| C | 3.61435300  | 0.32562700  | 0.22173400  |
| C | 1.77782900  | -1.49721700 | 0.42497700  |
| C | 3.16231000  | -1.18239500 | -0.02433300 |
| H | 3.88163100  | -1.82338500 | 0.50252200  |
| H | 3.25958500  | -1.39121800 | -1.09658600 |
| H | 1.60085100  | -1.57025500 | 1.49927100  |
| H | 1.60303400  | 1.53514400  | 1.42785500  |
| H | 3.69579100  | 0.48340200  | 1.30481300  |
| H | 4.62128100  | 0.42040000  | -0.20318400 |
| C | -2.20307200 | 0.69066900  | 0.04533900  |
| C | -2.34981400 | -0.58328600 | 0.03402800  |
| C | -3.39578800 | -1.64114000 | 0.07186200  |
| H | -3.22279900 | -2.37364800 | 0.86959900  |
| H | -4.37032100 | -1.17031400 | 0.25002200  |
| H | -3.45870400 | -2.19538700 | -0.87310300 |
| C | -2.98933800 | 1.95033200  | 0.10706900  |
| H | -4.06958300 | 1.75489300  | 0.13961000  |
| H | -2.72075900 | 2.53512000  | 0.99467600  |
| H | -2.78031500 | 2.58301300  | -0.76316300 |
| H | 2.61031400  | 1.35457700  | -1.46115500 |
| H | 0.92646100  | -1.64160800 | -1.49696800 |

22

G-sol = -638.552716 Hartree

|    |             |             |             |
|----|-------------|-------------|-------------|
| Ni | -0.33221200 | 0.33632800  | -0.24281500 |
| C  | -1.96315100 | 1.44551400  | -0.85434600 |
| C  | -1.13239700 | 2.15060900  | 0.06341700  |
| H  | -1.33586400 | 2.12543400  | 1.13386500  |
| H  | -0.65536100 | 3.06450300  | -0.27761400 |
| C  | 1.71344800  | -1.64620500 | -0.62731400 |
| C  | 0.20065600  | -1.69514400 | -0.53033200 |
| H  | 2.00916300  | -1.77098000 | -1.67974600 |
| H  | 2.15458500  | -2.51036800 | -0.10094500 |
| C  | -2.46907800 | 0.16989800  | -0.61712800 |
| C  | -2.77761700 | -0.48344400 | 0.71494600  |
| C  | -0.47639800 | -1.54873700 | 0.66176400  |

|   |             |             |             |
|---|-------------|-------------|-------------|
| C | -1.96821900 | -1.79806800 | 0.83288100  |
| H | -1.93852500 | 1.76665100  | -1.89650300 |
| H | -2.31200800 | -2.48992700 | 0.05231300  |
| H | -2.15990100 | -2.28145700 | 1.79916700  |
| H | -2.53383200 | 0.18063000  | 1.55181200  |
| H | -3.85245800 | -0.70621500 | 0.79202700  |
| H | 0.10046300  | -1.41169000 | 1.57540600  |
| C | 2.30214800  | -0.35126300 | -0.07716600 |
| C | 1.48402300  | 0.67848000  | 0.23411100  |
| C | 3.81294100  | -0.37821500 | 0.01426400  |
| H | 4.23941500  | 0.55510200  | 0.38847600  |
| H | 4.15214900  | -1.19228400 | 0.67253400  |
| H | 4.26023800  | -0.57375000 | -0.97171900 |
| C | 1.96552400  | 1.98868200  | 0.80930400  |
| H | 1.79814600  | 2.81348300  | 0.10353600  |
| H | 1.40306500  | 2.24714800  | 1.71608800  |
| H | 3.03086100  | 1.99691600  | 1.07606100  |
| H | -0.34802900 | -2.06117700 | -1.39831600 |
| H | -2.86145300 | -0.36184700 | -1.48403100 |

22-cc

G-sol = -638.534675 Hartree

|    |             |             |             |
|----|-------------|-------------|-------------|
| Ni | -0.50022100 | 0.27381500  | -0.62562700 |
| C  | -2.15984200 | 1.29422800  | -0.16580700 |
| C  | -2.54765100 | 0.37053700  | -1.16272300 |
| H  | -2.84784900 | 0.75557300  | -2.13511300 |
| H  | -3.01124300 | -0.57434300 | -0.89434300 |
| C  | 1.90986200  | -1.47987300 | -0.37406400 |
| C  | 0.50017800  | -1.66812600 | -0.90281900 |
| H  | 2.61646400  | -1.83229700 | -1.13998100 |
| H  | 2.08194400  | -2.13662700 | 0.49548300  |
| C  | -1.53968200 | 0.84330500  | 1.02866600  |
| C  | -1.82605700 | -0.50868700 | 1.67690400  |
| C  | -0.63944900 | -1.80515400 | -0.14514900 |
| C  | -0.77702300 | -1.61864800 | 1.34726600  |
| H  | -2.08737600 | 2.35453700  | -0.40893200 |
| H  | 0.41661600  | -1.93326200 | -1.95713800 |
| H  | 0.18655200  | -1.34570700 | 1.78689800  |
| H  | -1.11223800 | -2.55667500 | 1.81516700  |
| H  | -2.81464600 | -0.86571500 | 1.35828700  |
| H  | -1.87102500 | -0.38811800 | 2.76652800  |
| C  | 1.20891200  | 0.85248800  | 0.01411400  |
| C  | 2.22387000  | -0.04138300 | -0.01259300 |
| C  | 3.68230700  | 0.21349300  | 0.30237600  |

|   |             |             |             |
|---|-------------|-------------|-------------|
| H | 4.32423900  | -0.04997600 | -0.55076200 |
| H | 3.88967300  | 1.25299000  | 0.56684000  |
| H | 4.01478100  | -0.41419400 | 1.14303900  |
| C | 1.39354000  | 2.30432800  | 0.40761500  |
| H | 1.05621700  | 2.48324400  | 1.43900000  |
| H | 2.43425400  | 2.65054500  | 0.34799600  |
| H | 0.80006900  | 2.97303500  | -0.22938900 |
| H | -1.11571300 | 1.60350500  | 1.67862600  |
| H | -1.52832900 | -2.18239200 | -0.64737400 |

22-tt

G-sol = -638.557829 Hartree

|    |             |             |             |
|----|-------------|-------------|-------------|
| Ni | 0.28029900  | 0.41128700  | -0.06019000 |
| C  | 1.82149200  | 1.64839700  | 0.44333900  |
| C  | 0.69718100  | 2.36182600  | -0.06153400 |
| H  | 0.66195600  | 2.63390300  | -1.11730900 |
| H  | 0.16456100  | 3.03839800  | 0.59868600  |
| C  | -1.56044900 | -1.87406500 | 0.08750500  |
| C  | -0.15744400 | -1.67436900 | -0.43231700 |
| H  | -1.52884800 | -2.27670400 | 1.11309900  |
| H  | -2.05440600 | -2.64981600 | -0.51868700 |
| C  | 2.38250700  | 0.63818300  | -0.33177500 |
| C  | 3.20010600  | -0.51571200 | 0.19958200  |
| C  | 0.96155000  | -1.62762700 | 0.35680400  |
| C  | 2.39478800  | -1.78263000 | -0.13418700 |
| H  | 2.84557000  | -2.68390100 | 0.30678200  |
| H  | 2.38814000  | -1.93061300 | -1.22216900 |
| H  | 0.82426100  | -1.68765500 | 1.43956900  |
| H  | 2.02523200  | 1.66472400  | 1.51494400  |
| H  | 3.31942000  | -0.42272500 | 1.28726100  |
| H  | 4.20765200  | -0.55772600 | -0.23656100 |
| C  | -1.65031200 | 0.58080900  | -0.03531300 |
| C  | -2.34576600 | -0.58024900 | 0.04474300  |
| C  | -3.84566300 | -0.76650500 | 0.14113400  |
| H  | -4.10513400 | -1.36026600 | 1.03066000  |
| H  | -4.39814400 | 0.17336500  | 0.20289000  |
| H  | -4.23233900 | -1.32461400 | -0.72454400 |
| C  | -2.34861900 | 1.92380600  | -0.07689400 |
| H  | -3.44167300 | 1.85858900  | -0.15414900 |
| H  | -2.12381200 | 2.51551100  | 0.82141500  |
| H  | -2.00295900 | 2.52247300  | -0.92942800 |
| H  | -0.02921100 | -1.74913600 | -1.51377200 |
| H  | 2.33513100  | 0.72897300  | -1.41987300 |

TS23 (Imaginary Frequency = -348.35)

G-sol = -638.502995 Hartree

|    |             |             |             |
|----|-------------|-------------|-------------|
| Ni | -0.35914000 | 0.18608800  | -0.55499800 |
| C  | -1.07265000 | 1.86370500  | 0.13338600  |
| C  | -0.01628900 | 1.41755900  | 1.07903500  |
| H  | -0.31420000 | 0.76078900  | 1.89599500  |
| H  | 0.57851800  | 2.24520100  | 1.46671900  |
| C  | 1.34381600  | -1.89470100 | 0.29606200  |
| C  | -0.02122800 | -1.83741300 | -0.37630200 |
| H  | 1.96556100  | -2.66481200 | -0.17941000 |
| H  | 1.24387300  | -2.21047400 | 1.34712000  |
| C  | -2.18385900 | 1.10497100  | -0.30920500 |
| C  | -3.01063100 | 0.06533900  | 0.45834600  |
| C  | -1.12165400 | -1.47167700 | 0.37697300  |
| C  | -2.59642800 | -1.37041800 | 0.05758700  |
| H  | -0.85550000 | 2.78507200  | -0.40967000 |
| H  | -2.78633000 | -1.53378900 | -1.00934000 |
| H  | -3.17489700 | -2.11993300 | 0.62289800  |
| H  | -2.85453600 | 0.18197000  | 1.54071000  |
| H  | -4.08322000 | 0.22507100  | 0.28141000  |
| H  | -0.92860600 | -1.33833300 | 1.44687500  |
| C  | 2.09060100  | -0.56339300 | 0.20476500  |
| C  | 1.47724200  | 0.65755300  | 0.16570400  |
| C  | 3.59224600  | -0.72924200 | 0.06081100  |
| H  | 3.86286500  | -1.09073900 | -0.94222900 |
| H  | 4.15065200  | 0.19001500  | 0.24971000  |
| H  | 3.94961800  | -1.48982500 | 0.76885500  |
| C  | 2.29154900  | 1.89731900  | -0.17879600 |
| H  | 1.64211700  | 2.69788400  | -0.55070600 |
| H  | 2.82992200  | 2.30288500  | 0.69096100  |
| H  | 3.03136100  | 1.69941200  | -0.96140200 |
| H  | -0.11931700 | -2.24600800 | -1.38284100 |
| H  | -2.71825600 | 1.55755400  | -1.14590400 |

24

G-sol = -1099.500451 Hartree

|    |             |             |             |
|----|-------------|-------------|-------------|
| Ni | -0.23036500 | -0.18428200 | 0.54994700  |
| C  | -1.53552700 | -0.69300100 | 1.99280800  |
| C  | -0.42655000 | -1.56140700 | 2.08415300  |
| H  | -0.43040500 | -2.53139200 | 1.59477800  |
| H  | 0.22430300  | -1.49140900 | 2.95035900  |
| C  | 1.90749700  | -1.51100400 | -1.43011300 |

|   |             |             |             |
|---|-------------|-------------|-------------|
| C | 0.44071700  | -1.30100500 | -1.69585500 |
| H | 2.47533000  | -1.28154600 | -2.34614200 |
| H | 2.09106300  | -2.58042700 | -1.23641800 |
| C | -2.30558000 | -0.59916900 | 0.81079300  |
| C | -2.71200500 | -1.80505000 | -0.03919300 |
| C | -0.53272600 | -2.10885100 | -1.24186900 |
| C | -2.01646500 | -1.91965200 | -1.41314200 |
| H | -2.21849900 | -1.02469600 | -2.01478600 |
| H | -2.44692800 | -2.77573800 | -1.95570000 |
| H | -2.50822600 | -2.72712800 | 0.52295600  |
| H | -3.80026900 | -1.78004800 | -0.19191000 |
| H | -0.23566600 | -2.99470300 | -0.67703100 |
| C | 1.70654300  | -0.09550600 | 0.65448200  |
| C | 2.48890100  | -0.69633100 | -0.26737900 |
| C | 2.27080700  | 0.66242400  | 1.83940400  |
| H | 3.36716200  | 0.72191100  | 1.87341600  |
| H | 1.89610400  | 1.69680700  | 1.86803300  |
| H | 1.94166300  | 0.20517600  | 2.78274500  |
| C | 4.00701000  | -0.74027200 | -0.27653100 |
| H | 4.41311800  | -0.28272400 | -1.19184200 |
| H | 4.46409000  | -0.23204000 | 0.57557800  |
| H | 4.36857700  | -1.78006500 | -0.26938900 |
| P | -0.46114400 | 1.80796100  | -0.39557500 |
| C | -0.94406800 | 3.10160900  | 0.84263800  |
| C | -1.76286200 | 2.06360300  | -1.69695400 |
| C | 1.00228500  | 2.60007300  | -1.20670600 |
| H | -1.07009800 | 4.08665800  | 0.37811300  |
| H | -1.88327200 | 2.81301000  | 1.32542900  |
| H | -0.17258500 | 3.16718200  | 1.61597200  |
| H | -1.81111800 | 3.10921600  | -2.02304900 |
| H | -1.54668200 | 1.43448200  | -2.56670000 |
| H | -2.73952900 | 1.76812800  | -1.30209400 |
| H | 1.32231500  | 1.99371200  | -2.05936300 |
| H | 0.76907100  | 3.61325700  | -1.55397300 |
| H | 1.83517400  | 2.63825300  | -0.50010700 |
| H | -1.62048000 | 0.10870000  | 2.72799700  |
| H | -3.01319400 | 0.22979500  | 0.77944100  |
| H | 0.16850200  | -0.44264600 | -2.31043100 |

24-cc

G-sol = -1099.493206 Hartree

|    |             |            |            |
|----|-------------|------------|------------|
| Ni | -0.22914800 | 0.14393400 | 0.70934700 |
| C  | -0.56662400 | 1.62425800 | 2.02219700 |
| C  | 0.79078400  | 1.24894600 | 2.10183600 |

|   |             |             |             |
|---|-------------|-------------|-------------|
| H | 1.15557600  | 0.77561200  | 3.00859100  |
| H | 1.54514700  | 1.74149800  | 1.49426800  |
| C | 1.92412600  | -0.30083600 | -1.47966200 |
| C | 2.46488100  | 1.06655700  | -1.14761100 |
| H | 2.49245700  | -0.70623100 | -2.33164300 |
| H | 0.88424200  | -0.21482000 | -1.81658200 |
| C | -1.14926300 | 2.05987900  | 0.81394900  |
| C | -0.48907200 | 3.03407200  | -0.17361200 |
| C | 1.79369300  | 2.22566900  | -1.08405400 |
| C | 0.33934600  | 2.49385100  | -1.38070900 |
| H | 3.52532100  | 1.08734600  | -0.89089800 |
| H | -0.15235500 | 1.61235300  | -1.80026700 |
| H | 0.29793700  | 3.26879600  | -2.16134800 |
| H | 0.15436100  | 3.72497000  | 0.38957700  |
| H | -1.29640800 | 3.65100500  | -0.58769100 |
| C | 1.10809700  | -1.24591200 | 0.69792500  |
| C | 2.01312100  | -1.28899300 | -0.30345500 |
| C | 1.11317400  | -2.20390600 | 1.87054500  |
| H | 1.84975000  | -3.01558400 | 1.79656000  |
| H | 1.30674100  | -1.67002400 | 2.81148600  |
| H | 0.12786200  | -2.67726900 | 1.99617200  |
| C | 3.20181900  | -2.22818700 | -0.40631100 |
| H | 4.14325800  | -1.66311500 | -0.48338100 |
| H | 3.30007600  | -2.90111400 | 0.44898100  |
| H | 3.14424700  | -2.84928200 | -1.31390900 |
| P | -1.72635400 | -0.90143000 | -0.51254100 |
| C | -3.22014900 | -1.29823700 | 0.51253200  |
| C | -1.30507100 | -2.56074700 | -1.21190400 |
| C | -2.50323100 | -0.07432400 | -1.98163400 |
| H | -3.97212600 | -1.84879400 | -0.06512400 |
| H | -2.92021300 | -1.90287900 | 1.37408300  |
| H | -3.66476000 | -0.37051400 | 0.88582600  |
| H | -2.15949900 | -3.00039600 | -1.73915400 |
| H | -0.46117400 | -2.46485000 | -1.90044400 |
| H | -0.99573600 | -3.22758100 | -0.40245100 |
| H | -1.75033600 | 0.08684800  | -2.75962200 |
| H | -3.31395100 | -0.68256700 | -2.39936400 |
| H | -2.90206600 | 0.90057000  | -1.68667100 |
| H | -1.23829000 | 1.28343800  | 2.81243500  |
| H | 2.35476400  | 3.11340700  | -0.78330100 |
| H | -2.23715600 | 2.12793500  | 0.83006700  |

24-tt

G-sol = -1099.495613 Hartree

|    |             |             |             |
|----|-------------|-------------|-------------|
| Ni | 0.09494000  | -0.17104000 | 0.57231500  |
| C  | 0.95613400  | -1.49783200 | 1.85835600  |
| C  | 0.05669000  | -0.68997600 | 2.56988600  |
| H  | 0.37133600  | 0.26144600  | 2.99798100  |
| H  | -0.81627900 | -1.14241500 | 3.03061900  |
| C  | -1.96313300 | -1.58691300 | -1.30385900 |
| C  | -0.48664000 | -1.43788000 | -1.55144700 |
| H  | -2.16692800 | -2.58529100 | -0.88316000 |
| H  | -2.48970800 | -1.56493800 | -2.27215800 |
| C  | 1.99306600  | -0.95149900 | 1.05711700  |
| C  | 2.70468700  | -1.87048000 | 0.06862900  |
| C  | 0.47013200  | -2.26825900 | -1.09771000 |
| C  | 1.95036600  | -2.06318600 | -1.28005900 |
| H  | 2.39454700  | -2.91950800 | -1.80964300 |
| H  | 2.10870300  | -1.18202100 | -1.91238700 |
| H  | 0.16301500  | -3.14069000 | -0.51826200 |
| H  | 0.67557700  | -2.53899000 | 1.69736600  |
| H  | 2.84647200  | -2.86080200 | 0.52862700  |
| H  | 3.71256800  | -1.49799000 | -0.15153600 |
| C  | -1.80663400 | 0.19860800  | 0.47520600  |
| C  | -2.56438800 | -0.51286900 | -0.39175700 |
| C  | -4.07311900 | -0.42999300 | -0.55234000 |
| H  | -4.53560000 | -1.41642700 | -0.39436500 |
| H  | -4.55028300 | 0.26517200  | 0.14167800  |
| H  | -4.34916700 | -0.12332100 | -1.57295900 |
| C  | -2.40036200 | 1.22900400  | 1.41438900  |
| H  | -3.46295200 | 1.44869700  | 1.24628600  |
| H  | -2.29493800 | 0.90871800  | 2.45998400  |
| H  | -1.86608700 | 2.18750700  | 1.34561700  |
| P  | 0.78647700  | 1.69127000  | -0.43710200 |
| C  | 1.20407700  | 2.99054000  | 0.82139300  |
| C  | -0.41226700 | 2.59450000  | -1.52336500 |
| C  | 2.31650100  | 1.75219000  | -1.49355200 |
| H  | 1.50813400  | 3.93266600  | 0.34992600  |
| H  | 0.33527300  | 3.17497800  | 1.46016400  |
| H  | 2.02090400  | 2.63224500  | 1.45639800  |
| H  | -0.00601300 | 3.55337000  | -1.86553400 |
| H  | -0.65125500 | 1.97711300  | -2.39509700 |
| H  | -1.34263000 | 2.76615400  | -0.97602700 |
| H  | 2.17448000  | 1.14451000  | -2.39303400 |
| H  | 2.55738200  | 2.77724900  | -1.80000800 |
| H  | 3.16379000  | 1.33966100  | -0.93701400 |
| H  | 2.56562700  | -0.11387700 | 1.45524100  |
| H  | -0.19210200 | -0.59887900 | -2.18233200 |

TS25 (Imaginary Frequency = -321.15)



G-sol = -1099.464305 Hartree

|    |             |             |             |
|----|-------------|-------------|-------------|
| Ni | -0.19572500 | -0.27612800 | 0.58349600  |
| C  | 0.85424400  | -1.15868100 | 1.97746500  |
| C  | 1.75400600  | -0.10586700 | 1.49168900  |
| H  | 2.52833600  | -0.40727700 | 0.79393000  |
| H  | 2.16944800  | 0.48583900  | 2.30979700  |
| C  | 2.14853600  | 1.01154200  | -1.55612000 |
| C  | 1.41465000  | -0.28987700 | -1.71623200 |
| H  | 2.09568900  | 1.59289000  | -2.48975900 |
| H  | 3.22280700  | 0.81871500  | -1.39303600 |
| C  | 0.32299600  | -2.24415600 | 1.25058400  |
| C  | 1.05342200  | -3.14623100 | 0.24312600  |
| C  | 1.91567800  | -1.49816800 | -1.44076300 |
| C  | 1.10101500  | -2.74339200 | -1.25583200 |
| H  | 0.08090800  | -2.59176700 | -1.62956400 |
| H  | 1.53580900  | -3.58532000 | -1.81486100 |
| H  | 2.09241200  | -3.28381700 | 0.58086100  |
| H  | 0.59104000  | -4.14032400 | 0.29819100  |
| H  | 2.96984300  | -1.57936000 | -1.16237000 |
| C  | 0.97988700  | 1.39519600  | 0.68197800  |
| C  | 1.59689000  | 1.88859700  | -0.42733900 |
| C  | 0.48031000  | 2.33094200  | 1.77666100  |
| H  | 1.28119000  | 2.94713900  | 2.21241400  |
| H  | -0.28793000 | 3.01680900  | 1.39884800  |
| H  | 0.02754300  | 1.76588100  | 2.59926800  |
| C  | 1.83662300  | 3.36439600  | -0.66175100 |
| H  | 1.28233400  | 3.72612600  | -1.54146100 |
| H  | 1.55271400  | 3.98929400  | 0.18812100  |
| H  | 2.89982800  | 3.55711600  | -0.87512500 |
| P  | -2.12081100 | 0.17429700  | -0.29816700 |
| C  | -3.34570500 | 0.82886500  | 0.93668800  |
| C  | -3.09920800 | -1.21708000 | -1.04968500 |
| C  | -2.27372400 | 1.45657200  | -1.63905500 |
| H  | -4.32211200 | 1.02603300  | 0.47757500  |
| H  | -3.47082600 | 0.10106700  | 1.74454900  |
| H  | -2.96392900 | 1.75691000  | 1.37373400  |
| H  | -4.08602600 | -0.88932600 | -1.39907100 |
| H  | -2.54649700 | -1.63951100 | -1.89558900 |
| H  | -3.22556200 | -2.00876500 | -0.30468100 |
| H  | -1.72058200 | 1.13095900  | -2.52670500 |
| H  | -3.31720400 | 1.63948900  | -1.92263500 |
| H  | -1.82561200 | 2.39362600  | -1.29326400 |
| H  | 0.36773900  | -0.94490900 | 2.93316000  |
| H  | -0.44258900 | -2.78762700 | 1.80399800  |

H 0.36598000 -0.20873500 -2.00017600

TS25-cc (Imaginary Frequency = -317.91)

G-sol = -1099.462448 Hartree

|    |             |             |             |
|----|-------------|-------------|-------------|
| Ni | 0.29988300  | -0.32907900 | 0.69081300  |
| C  | -0.87704600 | -1.12181200 | 2.03081900  |
| C  | -1.58898800 | 0.09425000  | 1.63063300  |
| H  | -1.86152400 | 0.71124100  | 2.48795800  |
| H  | -2.42381000 | -0.04852900 | 0.95555400  |
| C  | -1.51150700 | 1.07987400  | -1.56804400 |
| C  | -2.73529300 | 0.21151500  | -1.39242800 |
| H  | -1.68175800 | 1.72723200  | -2.44088700 |
| H  | -0.64662800 | 0.45038400  | -1.81841600 |
| C  | -0.54318600 | -2.20995500 | 1.20138000  |
| C  | -1.36393500 | -2.84980400 | 0.07489200  |
| C  | -2.77146800 | -1.12233000 | -1.26026900 |
| C  | -1.61832200 | -2.09097600 | -1.26229800 |
| H  | -3.68225400 | 0.75201600  | -1.34794900 |
| H  | -0.68944500 | -1.60519300 | -1.57484700 |
| H  | -1.83732000 | -2.86017700 | -2.01867400 |
| H  | -2.33894400 | -3.16795800 | 0.47720700  |
| H  | -0.84285700 | -3.77742600 | -0.19257100 |
| C  | -0.64686500 | 1.47559400  | 0.78991500  |
| C  | -1.12927000 | 1.97442100  | -0.38281800 |
| C  | -0.11438100 | 2.40145700  | 1.87576300  |
| H  | -0.88371400 | 3.07287000  | 2.28615500  |
| H  | 0.28750300  | 1.82393000  | 2.71628300  |
| H  | 0.70131700  | 3.03221900  | 1.50051500  |
| C  | -1.20659200 | 3.45620800  | -0.68293700 |
| H  | -2.21192700 | 3.73148900  | -1.03605000 |
| H  | -0.97830800 | 4.08397100  | 0.18185700  |
| H  | -0.51411000 | 3.74014000  | -1.49145000 |
| P  | 2.13843900  | -0.15020400 | -0.41691800 |
| C  | 3.61147600  | -0.10181500 | 0.71604800  |
| C  | 2.47315300  | 1.34043900  | -1.47781800 |
| C  | 2.63703400  | -1.51390000 | -1.57762000 |
| H  | 4.55181700  | -0.02229900 | 0.15699900  |
| H  | 3.52612600  | 0.75508100  | 1.39191200  |
| H  | 3.63184300  | -1.01146600 | 1.32406300  |
| H  | 3.49048700  | 1.33585200  | -1.88708100 |
| H  | 1.75781300  | 1.37016200  | -2.30614800 |
| H  | 2.32968600  | 2.24673200  | -0.88122400 |
| H  | 1.91944900  | -1.57710900 | -2.40231500 |
| H  | 3.63960900  | -1.35357700 | -1.99269300 |
| H  | 2.61773200  | -2.46757500 | -1.04132500 |

|   |             |             |             |
|---|-------------|-------------|-------------|
| H | -0.36524200 | -1.08369000 | 2.99602800  |
| H | 0.09289800  | -2.94499800 | 1.69526000  |
| H | -3.75059600 | -1.58504600 | -1.11845100 |

TS25-tt (Imaginary Frequency = -333.21)

G-sol = -1099.457751 Hartree

|    |             |             |             |
|----|-------------|-------------|-------------|
| Ni | -0.13146100 | 0.10914300  | 0.42536300  |
| C  | 0.97087000  | 1.35414900  | 1.56549600  |
| C  | 1.27249800  | -0.01950500 | 1.98255000  |
| H  | 0.60276900  | -0.46587800 | 2.72067600  |
| H  | 2.30991200  | -0.15537600 | 2.29259400  |
| C  | 2.48126000  | 0.12686500  | -1.24827300 |
| C  | 1.28484500  | 1.02436100  | -1.46953700 |
| H  | 3.27700700  | 0.69882200  | -0.74351000 |
| H  | 2.91074700  | -0.17619300 | -2.21503000 |
| C  | -0.29160000 | 1.95216200  | 1.37159900  |
| C  | -0.35009400 | 3.25137200  | 0.57097800  |
| C  | 1.23062400  | 2.33854200  | -1.19239100 |
| C  | -0.04391900 | 3.10043800  | -0.96570100 |
| H  | 0.00037200  | 4.10879700  | -1.40109700 |
| H  | -0.88116300 | 2.57145000  | -1.43614100 |
| H  | 2.14428600  | 2.83755000  | -0.86021400 |
| H  | 1.82240600  | 1.86260300  | 1.12280100  |
| H  | 0.35874200  | 3.98573600  | 0.98375400  |
| H  | -1.34397800 | 3.70630500  | 0.66518000  |
| C  | 1.35541300  | -1.27276100 | 0.62028600  |
| C  | 2.17742600  | -1.16624600 | -0.46677800 |
| C  | 2.90547200  | -2.36078700 | -1.05605400 |
| H  | 3.97841400  | -2.13779000 | -1.16000200 |
| H  | 2.81890700  | -3.26767700 | -0.45460500 |
| H  | 2.54539900  | -2.59306000 | -2.06997700 |
| C  | 1.11995600  | -2.62221900 | 1.28322000  |
| H  | 0.89646200  | -3.40672600 | 0.55190200  |
| H  | 1.98796800  | -2.96122600 | 1.86849900  |
| H  | 0.27134600  | -2.57304100 | 1.97334600  |
| P  | -1.96282600 | -0.76444600 | -0.29416800 |
| C  | -1.96049100 | -2.51389800 | -0.92964400 |
| C  | -2.84108400 | 0.08584300  | -1.69868700 |
| C  | -3.33858000 | -0.85920200 | 0.95283200  |
| H  | -2.95515100 | -2.83699200 | -1.25963600 |
| H  | -1.26323500 | -2.59270800 | -1.77043400 |
| H  | -1.61029300 | -3.18726600 | -0.14115700 |
| H  | -3.77313700 | -0.42399500 | -1.97168000 |
| H  | -3.07012700 | 1.11777700  | -1.41389200 |

|   |             |             |             |
|---|-------------|-------------|-------------|
| H | -2.18752400 | 0.11682500  | -2.57718400 |
| H | -3.55645800 | 0.14532900  | 1.32937300  |
| H | -4.25340700 | -1.28852000 | 0.52617700  |
| H | -3.01983700 | -1.47445800 | 1.80066800  |
| H | -1.11193100 | 1.76250300  | 2.06383400  |
| H | 0.38923600  | 0.52321900  | -1.84125000 |

26

G-sol = -1099.490333 Hartree

|    |             |             |             |
|----|-------------|-------------|-------------|
| Ni | -0.03665900 | -0.60787500 | -0.09766400 |
| C  | 0.96344100  | -0.59072700 | 1.67573200  |
| C  | 2.10096700  | 0.36241800  | 1.30218700  |
| H  | 2.82584100  | -0.10606400 | 0.63957200  |
| H  | 2.65367300  | 0.62950800  | 2.21791900  |
| C  | 1.58845600  | 1.04479500  | -1.82019200 |
| C  | 0.84664600  | -0.30519600 | -1.89785900 |
| H  | 1.36087000  | 1.63085200  | -2.71771800 |
| H  | 2.67133700  | 0.85385200  | -1.86543300 |
| C  | 0.70545300  | -1.92655900 | 1.36320200  |
| C  | 1.51388300  | -2.95475600 | 0.56294500  |
| C  | 1.49204900  | -1.33997300 | -1.21391900 |
| C  | 1.23902100  | -2.80716100 | -0.96183600 |
| H  | 0.20978000  | -3.10552800 | -1.19804100 |
| H  | 1.91115000  | -3.46533000 | -1.53695700 |
| H  | 2.59041300  | -2.81549200 | 0.73371100  |
| H  | 1.27184800  | -3.96554700 | 0.91503100  |
| H  | 2.48891600  | -1.08237300 | -0.85878900 |
| C  | 1.53707300  | 1.67509000  | 0.70985300  |
| C  | 1.30331600  | 1.95428600  | -0.59942300 |
| C  | 1.22686400  | 2.64668400  | 1.83571500  |
| H  | 2.15797400  | 3.00417400  | 2.29976000  |
| H  | 0.64784800  | 3.52237600  | 1.54153300  |
| H  | 0.66599800  | 2.13952600  | 2.63275300  |
| C  | 0.75887600  | 3.29332700  | -1.06473700 |
| H  | -0.15426200 | 3.14676500  | -1.65849100 |
| H  | 0.52980100  | 4.00384400  | -0.27015200 |
| H  | 1.48194400  | 3.77744500  | -1.73705500 |
| P  | -2.14305900 | 0.01269800  | 0.02018700  |
| C  | -2.76569100 | 0.75196900  | 1.61247700  |
| C  | -3.32853700 | -1.40884300 | -0.17352400 |
| C  | -2.87218000 | 1.21708800  | -1.19726700 |
| H  | -3.84452900 | 0.94814200  | 1.58781400  |
| H  | -2.55016200 | 0.06823100  | 2.44064900  |
| H  | -2.24010100 | 1.69257000  | 1.80903400  |

|   |             |             |             |
|---|-------------|-------------|-------------|
| H | -4.37355400 | -1.09129500 | -0.07130100 |
| H | -3.19217100 | -1.86669300 | -1.15880400 |
| H | -3.11273500 | -2.17014600 | 0.58331200  |
| H | -2.71538000 | 0.84237200  | -2.21412000 |
| H | -3.94586000 | 1.37641400  | -1.03743100 |
| H | -2.35468000 | 2.17804000  | -1.11136000 |
| H | 0.31507100  | -0.17582700 | 2.45034100  |
| H | -0.12180000 | -2.36127800 | 1.92681100  |
| H | 0.13727800  | -0.45317200 | -2.71092800 |

26-cc

G-sol = -1099.492686 Hartree

|    |             |             |             |
|----|-------------|-------------|-------------|
| Ni | 0.76408900  | 0.15427600  | -0.74442500 |
| C  | -0.87647900 | 0.61883000  | -1.76530100 |
| C  | -2.26971000 | 0.27560900  | -1.25233600 |
| H  | -2.96282900 | 0.36093300  | -2.10392500 |
| H  | -2.58126000 | 1.03336000  | -0.53387900 |
| C  | -1.52008500 | -0.36239100 | 1.58693300  |
| C  | -2.31920600 | 0.89114900  | 1.84500800  |
| H  | -1.33766700 | -0.85857100 | 2.55180600  |
| H  | -0.52802100 | -0.09612600 | 1.18514700  |
| C  | -0.15669000 | 1.78076700  | -1.44528800 |
| C  | -0.57649100 | 2.90873000  | -0.49744600 |
| C  | -1.93291700 | 2.15064900  | 1.60067700  |
| C  | -0.61145600 | 2.62292500  | 1.03855800  |
| H  | -3.31883400 | 0.73037700  | 2.25174100  |
| H  | 0.19163200  | 1.91517700  | 1.27004300  |
| H  | -0.35672100 | 3.56062800  | 1.55127700  |
| H  | -1.55542000 | 3.30655500  | -0.80604900 |
| H  | 0.13668300  | 3.72728100  | -0.65243100 |
| C  | -2.45458400 | -1.11430200 | -0.64417300 |
| C  | -2.16298600 | -1.38916500 | 0.64594100  |
| C  | -3.01053700 | -2.11856600 | -1.62982500 |
| H  | -4.01791800 | -1.82315000 | -1.95773100 |
| H  | -2.38793700 | -2.14006700 | -2.53538000 |
| H  | -3.07019600 | -3.14022000 | -1.25010800 |
| C  | -2.37608800 | -2.73483700 | 1.30490500  |
| H  | -3.02845100 | -2.63019600 | 2.18399000  |
| H  | -2.82456600 | -3.48617300 | 0.65271400  |
| H  | -1.42451700 | -3.14196100 | 1.67739900  |
| P  | 2.63795700  | -0.49979000 | 0.14071700  |
| C  | 4.00984400  | -0.95749100 | -1.02765000 |
| C  | 2.61425300  | -2.00051700 | 1.23968500  |
| C  | 3.50204500  | 0.72680600  | 1.23541300  |

|   |             |             |             |
|---|-------------|-------------|-------------|
| H | 4.91879000  | -1.26056000 | -0.49340000 |
| H | 3.68114000  | -1.78153000 | -1.66906900 |
| H | 4.24000900  | -0.10284800 | -1.67151400 |
| H | 3.61467400  | -2.24226700 | 1.61863700  |
| H | 1.94467300  | -1.82555500 | 2.08780900  |
| H | 2.23128500  | -2.85957900 | 0.67916400  |
| H | 2.85176500  | 0.98906100  | 2.07568000  |
| H | 4.44682500  | 0.32721600  | 1.62387400  |
| H | 3.70660000  | 1.64049100  | 0.66888900  |
| H | -0.61564900 | 0.13399000  | -2.71359300 |
| H | 0.57830200  | 2.10697200  | -2.18643900 |
| H | -2.64973200 | 2.94469600  | 1.81788600  |

26-tt

G-sol = -1099.481599 Hartree

|    |             |             |             |
|----|-------------|-------------|-------------|
| Ni | 0.06858200  | -0.00973900 | -0.24065600 |
| C  | 1.79439400  | -0.14236400 | -1.29362800 |
| C  | 1.59539900  | 1.29018500  | -1.74159900 |
| H  | 1.05139100  | 1.35450500  | -2.69223700 |
| H  | 2.55578000  | 1.81050100  | -1.89779200 |
| C  | 1.98818600  | 1.06726900  | 1.48728200  |
| C  | 1.55274800  | -0.37735400 | 1.67795800  |
| H  | 2.93871100  | 1.09989800  | 0.94457400  |
| H  | 2.15228100  | 1.59617200  | 2.43750600  |
| C  | 1.03580400  | -1.30599500 | -1.50401700 |
| C  | 1.53188600  | -2.61923500 | -0.88102200 |
| C  | 2.23999600  | -1.45279200 | 1.24936500  |
| C  | 1.58891800  | -2.68949000 | 0.69852900  |
| H  | 2.12767800  | -3.60823600 | 0.96884700  |
| H  | 0.56528400  | -2.77496400 | 1.08415200  |
| H  | 3.28796100  | -1.31898200 | 0.97234900  |
| H  | 2.70150100  | -0.26720700 | -0.71701600 |
| H  | 2.54182600  | -2.84729000 | -1.25590100 |
| H  | 0.89447900  | -3.44797200 | -1.21436200 |
| C  | 0.72508900  | 1.97591700  | -0.66007600 |
| C  | 0.85633600  | 1.81114000  | 0.72061400  |
| C  | -0.01958700 | 2.57495700  | 1.70222800  |
| H  | 0.48783700  | 3.48525300  | 2.05900200  |
| H  | -0.98886600 | 2.87249600  | 1.29781500  |
| H  | -0.21456000 | 1.95981600  | 2.58933500  |
| C  | -0.22817600 | 2.99120800  | -1.26564200 |
| H  | -0.82107000 | 2.53936500  | -2.06962300 |
| H  | -0.91735000 | 3.45042700  | -0.55541500 |
| H  | 0.35425600  | 3.80558800  | -1.72482200 |

|   |             |             |             |
|---|-------------|-------------|-------------|
| P | -2.02827600 | -0.49996600 | 0.07321900  |
| C | -3.23317300 | 0.41855300  | -1.00859500 |
| C | -2.80380100 | -0.21959300 | 1.74601800  |
| C | -2.58987200 | -2.24756200 | -0.24008700 |
| H | -4.27078000 | 0.12179400  | -0.81228300 |
| H | -3.13218600 | 1.49537700  | -0.84037300 |
| H | -3.00129500 | 0.21921400  | -2.06002500 |
| H | -3.86612500 | -0.49256900 | 1.76378400  |
| H | -2.27644200 | -0.81646600 | 2.49867400  |
| H | -2.70242100 | 0.83442200  | 2.02429000  |
| H | -2.06282700 | -2.92784900 | 0.43726400  |
| H | -3.67065100 | -2.37130500 | -0.09663500 |
| H | -2.33113700 | -2.53153000 | -1.26545300 |
| H | 0.37637000  | -1.40327500 | -2.36767800 |
| H | 0.51931500  | -0.51405800 | 2.00815200  |

27

G-sol = -943.613322 Hartree

|    |             |             |             |
|----|-------------|-------------|-------------|
| Ni | -0.42495900 | 0.02343200  | -0.01877400 |
| P  | 1.78794500  | 0.08896300  | 0.00124900  |
| C  | 2.74103400  | 1.68496400  | -0.01390200 |
| H  | 3.82055100  | 1.49596700  | 0.02073100  |
| H  | 2.51113000  | 2.24759600  | -0.92379900 |
| H  | 2.46293900  | 2.30074600  | 0.84559500  |
| C  | 2.56568900  | -0.70661200 | 1.48910300  |
| H  | 2.20354100  | -1.73161800 | 1.60279600  |
| H  | 3.66020900  | -0.71563900 | 1.42121400  |
| H  | 2.27017300  | -0.14812900 | 2.38338900  |
| C  | 2.65520700  | -0.76970900 | -1.39904500 |
| H  | 2.37593400  | -0.28529700 | -2.34058800 |
| H  | 3.74471100  | -0.72202400 | -1.28493300 |
| H  | 2.34829700  | -1.81591100 | -1.45543000 |
| C  | -0.83306000 | 1.94269200  | 0.04575700  |
| C  | -1.89555900 | 1.30887000  | -0.21484700 |
| C  | -1.66933300 | -1.47409600 | 0.21492400  |
| C  | -0.52909100 | -1.94425000 | -0.06696900 |
| C  | -3.34409500 | 1.32894400  | -0.53043000 |
| H  | -3.57644000 | 0.72199000  | -1.41319100 |
| H  | -3.94878200 | 0.94258900  | 0.29751700  |
| H  | -3.67619900 | 2.35685100  | -0.73157100 |
| C  | -0.20674800 | 3.27259400  | 0.26719200  |
| H  | 0.31391100  | 3.32505100  | 1.23095800  |
| H  | 0.52866000  | 3.51402800  | -0.50887500 |
| H  | -0.96802700 | 4.06479800  | 0.25916900  |

|   |             |             |             |
|---|-------------|-------------|-------------|
| C | -3.08743700 | -1.72992700 | 0.56489200  |
| H | -3.24163400 | -2.79761900 | 0.77449100  |
| H | -3.39620900 | -1.16564800 | 1.45252900  |
| H | -3.76603900 | -1.45163500 | -0.24899000 |
| C | 0.26682300  | -3.17677900 | -0.31101800 |
| H | -0.30217000 | -4.07200000 | -0.02490100 |
| H | 0.52562500  | -3.27982900 | -1.37278300 |
| H | 1.20891700  | -3.19495300 | 0.24967000  |

27b

G-sol = -1697.699471 Hartree

|    |             |             |             |
|----|-------------|-------------|-------------|
| Ni | 0.03466800  | -0.40268600 | 0.09725800  |
| P  | 0.22633500  | -2.56028200 | 0.61743200  |
| C  | -1.04394000 | -3.14158600 | 1.82870000  |
| H  | -0.82622500 | -4.16819400 | 2.14515000  |
| H  | -1.03370900 | -2.49002600 | 2.70852200  |
| H  | -2.03186100 | -3.10736800 | 1.36800700  |
| C  | 0.12364700  | -3.77534400 | -0.76066500 |
| H  | 0.92649900  | -3.56084700 | -1.47114000 |
| H  | 0.22720100  | -4.80146400 | -0.38956100 |
| H  | -0.84651400 | -3.65973600 | -1.25087700 |
| C  | 1.77066800  | -3.03803200 | 1.51624800  |
| H  | 1.90985000  | -2.38043500 | 2.38063200  |
| H  | 1.69875200  | -4.07363700 | 1.86782600  |
| H  | 2.62993500  | -2.94179500 | 0.85156400  |
| C  | -1.87139800 | -0.36252800 | -0.12320800 |
| C  | -1.44529700 | 0.83879700  | -0.09991700 |
| C  | 1.42160200  | 0.98708800  | 0.16390600  |
| C  | 1.92421600  | -0.10150700 | -0.24096800 |
| C  | -1.66582500 | 2.28146000  | -0.10600400 |
| O  | -1.62686400 | 2.97926200  | 0.88970100  |
| O  | -1.88434000 | 2.73419000  | -1.35205100 |
| C  | -3.06821500 | -1.17869800 | -0.33006600 |
| O  | -3.08084500 | -2.37375000 | -0.57340900 |
| O  | -4.18985200 | -0.43266000 | -0.24105500 |
| C  | 1.42263100  | 2.42491900  | 0.41846900  |
| O  | 1.26458900  | 3.26011400  | -0.45030100 |
| O  | 1.58887500  | 2.68976600  | 1.72287000  |
| C  | 3.08350500  | -0.78713900 | -0.80679900 |
| O  | 3.10572900  | -1.94143500 | -1.19896600 |
| O  | 4.14873500  | 0.03859800  | -0.86867200 |
| C  | -1.96658200 | 4.16639500  | -1.47658800 |
| H  | -2.13658000 | 4.35189000  | -2.53724200 |
| H  | -2.79446800 | 4.55701900  | -0.87915600 |



|   |             |             |             |
|---|-------------|-------------|-------------|
| H | -1.02744100 | 4.61844900  | -1.15056800 |
| C | -5.41850100 | -1.14068200 | -0.47393500 |
| H | -6.20717600 | -0.39751200 | -0.35466400 |
| H | -5.43402800 | -1.56062500 | -1.48339700 |
| H | -5.53906700 | -1.95060700 | 0.25067600  |
| C | 1.46150900  | 4.07834300  | 2.08658900  |
| H | 0.45642100  | 4.42833200  | 1.84218400  |
| H | 1.63135900  | 4.10829400  | 3.16281800  |
| H | 2.20579300  | 4.68236800  | 1.56130900  |
| C | 5.32920700  | -0.52634400 | -1.46382400 |
| H | 5.12851500  | -0.83679000 | -2.49268600 |
| H | 6.07301000  | 0.27021400  | -1.44051100 |
| H | 5.67242800  | -1.39160300 | -0.89013300 |

27c

G-sol = -1172.568754 Hartree

|    |             |             |             |
|----|-------------|-------------|-------------|
| Ni | -0.61231700 | -0.05800400 | -0.01536800 |
| P  | -2.80280000 | -0.03908900 | 0.00014900  |
| C  | -3.77450500 | -1.61568800 | -0.10037800 |
| H  | -4.85204100 | -1.41942100 | -0.07047100 |
| H  | -3.53877100 | -2.13954800 | -1.03234100 |
| H  | -3.51246100 | -2.27044000 | 0.73690900  |
| C  | -3.56015100 | 0.72345100  | 1.51090700  |
| H  | -3.17285700 | 1.73661400  | 1.65144600  |
| H  | -4.65353200 | 0.76198500  | 1.44162800  |
| H  | -3.27840000 | 0.13334000  | 2.38890800  |
| C  | -3.59436700 | 0.92742100  | -1.36938100 |
| H  | -3.32642900 | 0.47440600  | -2.32931200 |
| H  | -4.68641200 | 0.94736000  | -1.27519800 |
| H  | -3.21424500 | 1.95290600  | -1.36708100 |
| C  | -0.54536500 | -1.99186900 | -0.14137200 |
| C  | 0.65035300  | -1.61405000 | -0.02062000 |
| C  | 0.58706900  | 1.51340100  | -0.00927300 |
| C  | -0.63125200 | 1.85050800  | 0.10894300  |
| C  | 2.09943600  | -2.02910400 | 0.02403000  |
| C  | 2.58574200  | -2.26626700 | -1.42217900 |
| C  | 2.21256300  | -3.31733600 | 0.85614900  |
| H  | 1.99312600  | -3.03999800 | -1.92200400 |
| H  | 2.50667100  | -1.34195700 | -2.00359700 |
| H  | 3.63603700  | -2.57904800 | -1.40042200 |
| H  | 3.26052400  | -3.63487500 | 0.89048400  |
| H  | 1.87280500  | -3.13269400 | 1.87957100  |
| H  | 1.60907200  | -4.12041100 | 0.42182600  |
| C  | 1.96414900  | 2.09122900  | -0.00326200 |

|   |             |             |             |
|---|-------------|-------------|-------------|
| C | 1.94832100  | 3.49049100  | -0.64276600 |
| C | 2.51228700  | 2.14004000  | 1.43504800  |
| H | 1.30119300  | 4.16775100  | -0.07667400 |
| H | 2.95943900  | 3.92022800  | -0.65400800 |
| H | 1.58180500  | 3.43119200  | -1.67142100 |
| H | 3.52897700  | 2.55693800  | 1.43782600  |
| H | 1.88305600  | 2.77633100  | 2.06521100  |
| H | 2.54141700  | 1.13455200  | 1.86213600  |
| H | -1.29065900 | -2.76034700 | -0.23851100 |
| H | -1.35319900 | 2.64594600  | 0.21085300  |
| O | 2.93879300  | -1.08494000 | 0.66713100  |
| H | 2.92293600  | -0.27506700 | 0.11382300  |
| O | 2.81623700  | 1.23909800  | -0.81402500 |
| H | 3.70289100  | 1.63806700  | -0.81144700 |

TS28 (Imaginary Frequency = -215.18)

G-sol = -943.582573 Hartree

|    |             |             |             |
|----|-------------|-------------|-------------|
| Ni | 0.13167400  | 0.02668400  | -0.00620200 |
| P  | -1.99940200 | 0.04132700  | -0.00234300 |
| C  | -2.79483800 | -0.81710100 | 1.43639600  |
| H  | -3.88934600 | -0.79006700 | 1.37224100  |
| H  | -2.46232800 | -1.85927500 | 1.46754000  |
| H  | -2.47835700 | -0.33428100 | 2.36638800  |
| C  | -2.87785400 | 1.67323100  | 0.02245900  |
| H  | -2.59451700 | 2.25277800  | -0.86194500 |
| H  | -3.96757900 | 1.55172200  | 0.03688000  |
| H  | -2.56657000 | 2.23606500  | 0.90787200  |
| C  | -2.81570700 | -0.79496800 | -1.44014000 |
| H  | -2.47633300 | -1.83366800 | -1.49188000 |
| H  | -3.90912300 | -0.77306400 | -1.35915800 |
| H  | -2.51458700 | -0.29683600 | -2.36705400 |
| C  | 0.94047600  | 1.71744100  | 0.21255500  |
| C  | 1.92322500  | 0.93545200  | -0.15520400 |
| C  | 0.81937100  | -1.71888300 | -0.21742300 |
| C  | 1.85251000  | -1.00874700 | 0.15739400  |
| C  | 3.22895700  | 1.15040500  | -0.85734700 |
| H  | 4.10092200  | 0.95642700  | -0.22213900 |
| H  | 3.31795100  | 0.50725400  | -1.74124400 |
| H  | 3.28885600  | 2.19558800  | -1.18651800 |
| C  | 0.77915900  | 3.19847500  | 0.29170700  |
| H  | -0.10841400 | 3.53309000  | -0.25920400 |
| H  | 0.63580400  | 3.51747800  | 1.33283200  |
| H  | 1.65055600  | 3.74552900  | -0.10126000 |
| C  | 0.55214500  | -3.18425700 | -0.29668800 |

|   |             |             |             |
|---|-------------|-------------|-------------|
| H | 1.38272400  | -3.79342700 | 0.09320300  |
| H | -0.35482900 | -3.45534500 | 0.25886100  |
| H | 0.38145200  | -3.49282300 | -1.33676000 |
| C | 3.13597700  | -1.31776900 | 0.86610800  |
| H | 4.02279200  | -1.18583200 | 0.23574400  |
| H | 3.26549400  | -0.68316800 | 1.75119700  |
| H | 3.11905600  | -2.36486200 | 1.19429200  |

TS28b (Imaginary Frequency = -165.46)

G-sol = -1697.676281 Hartree

|    |             |             |             |
|----|-------------|-------------|-------------|
| Ni | -0.00977900 | 0.77728000  | -0.02814900 |
| P  | 0.05101200  | 2.93563800  | -0.01816800 |
| C  | 1.25073900  | 3.68570000  | -1.20108100 |
| H  | 1.31056400  | 4.77314100  | -1.07694500 |
| H  | 2.23501400  | 3.23235900  | -1.05066400 |
| H  | 0.93193500  | 3.46024300  | -2.22393700 |
| C  | -1.53280500 | 3.80469300  | -0.39008400 |
| H  | -2.32039100 | 3.41550200  | 0.26204500  |
| H  | -1.43874800 | 4.88860600  | -0.25762600 |
| H  | -1.81943800 | 3.59631500  | -1.42610100 |
| C  | 0.54992900  | 3.64078700  | 1.61339200  |
| H  | 1.53904700  | 3.26129300  | 1.88575200  |
| H  | 0.57982600  | 4.73590000  | 1.58080400  |
| H  | -0.16302700 | 3.32274800  | 2.38008300  |
| C  | -1.75966900 | 0.07781700  | -0.13450400 |
| C  | -0.99720600 | -0.93551400 | 0.17203300  |
| C  | 1.72943000  | 0.05383400  | 0.10630800  |
| C  | 0.95923400  | -0.94899900 | -0.21330000 |
| C  | 3.14692200  | 0.40127200  | 0.10351400  |
| O  | 3.65918700  | 1.18492100  | -0.67716900 |
| O  | 3.81460600  | -0.20351500 | 1.10591700  |
| C  | 1.14749800  | -2.22621700 | -0.93616400 |
| O  | 0.28492100  | -2.86121000 | -1.50629200 |
| O  | 2.45165300  | -2.57193000 | -0.91938100 |
| C  | -1.19213800 | -2.20474300 | 0.90659800  |
| O  | -0.33205200 | -2.84118500 | 1.47925600  |
| O  | -2.49851000 | -2.54224900 | 0.89688200  |
| C  | -3.16958900 | 0.44986700  | -0.07219400 |
| O  | -3.63831700 | 1.20175800  | 0.76445900  |
| O  | -3.88066900 | -0.09088400 | -1.08163900 |
| C  | 5.20877200  | 0.12953700  | 1.20240800  |
| H  | 5.34133600  | 1.20802200  | 1.32638500  |
| H  | 5.57387300  | -0.40608200 | 2.07898900  |
| H  | 5.74311800  | -0.19348700 | 0.30490700  |

|   |             |             |             |
|---|-------------|-------------|-------------|
| C | 2.76629000  | -3.78458700 | -1.62155200 |
| H | 3.83997000  | -3.92334300 | -1.49197400 |
| H | 2.21434700  | -4.62640600 | -1.19538500 |
| H | 2.51529500  | -3.69152500 | -2.68177700 |
| C | -2.81834300 | -3.74633700 | 1.61145500  |
| H | -3.89289100 | -3.88086700 | 1.48476700  |
| H | -2.27125100 | -4.59508300 | 1.19281800  |
| H | -2.56530900 | -3.64411000 | 2.67034800  |
| C | -5.27057800 | 0.27082800  | -1.11364000 |
| H | -5.78159000 | -0.09118400 | -0.21737200 |
| H | -5.38625300 | 1.35653600  | -1.17496200 |
| H | -5.67425100 | -0.21025200 | -2.00486600 |

TS28c (Imaginary Frequency = -296.48)

G-sol = -1172.527761 Hartree

|    |             |             |             |
|----|-------------|-------------|-------------|
| Ni | 0.76131800  | -0.04168100 | 0.00427300  |
| P  | 2.92189300  | -0.02818400 | 0.01068000  |
| C  | 3.71506400  | -0.81326500 | -1.46841500 |
| H  | 4.80910700  | -0.75351700 | -1.42432400 |
| H  | 3.41608100  | -1.86462600 | -1.52648800 |
| H  | 3.36184800  | -0.31205800 | -2.37453800 |
| C  | 3.72037600  | 1.64399800  | 0.02509500  |
| H  | 3.42653600  | 2.17819800  | 0.93436900  |
| H  | 4.81427700  | 1.57840100  | -0.01312600 |
| H  | 3.36344400  | 2.21975600  | -0.83432200 |
| C  | 3.80377200  | -0.86984000 | 1.40557300  |
| H  | 3.50580900  | -1.92248600 | 1.43893000  |
| H  | 4.89366200  | -0.80733600 | 1.30210300  |
| H  | 3.50549000  | -0.40709400 | 2.35152200  |
| C  | 0.04762700  | 1.10650900  | -1.31838900 |
| C  | -0.93512900 | 0.90848800  | -0.48346500 |
| C  | -0.98724900 | -0.86013900 | 0.43436800  |
| C  | -0.05915500 | -1.11712300 | 1.32013200  |
| C  | -2.02846500 | 1.78263000  | 0.14201700  |
| C  | -2.42541300 | 2.85627800  | -0.89278000 |
| C  | -1.48507800 | 2.43288000  | 1.42324200  |
| H  | -1.57531800 | 3.48638000  | -1.17491900 |
| H  | -2.82018600 | 2.38419400  | -1.79907500 |
| H  | -3.20805300 | 3.48978400  | -0.46248500 |
| H  | -2.28442000 | 3.01734600  | 1.89273300  |
| H  | -1.15784200 | 1.66207200  | 2.12655900  |
| H  | -0.64020500 | 3.09179400  | 1.20071600  |
| C  | -2.10546100 | -1.72223500 | -0.13574600 |
| C  | -1.48582000 | -2.93982700 | -0.84581600 |

|   |             |             |             |
|---|-------------|-------------|-------------|
| C | -3.04852700 | -2.15718000 | 0.99924700  |
| H | -0.90680000 | -3.54545500 | -0.14249400 |
| H | -2.27374200 | -3.57424900 | -1.27620000 |
| H | -0.82301900 | -2.60781800 | -1.65015500 |
| H | -3.85453800 | -2.78975000 | 0.60261300  |
| H | -2.50657800 | -2.73665800 | 1.75293700  |
| H | -3.48277600 | -1.27669300 | 1.47836300  |
| H | 0.24474800  | 1.86678000  | -2.06404500 |
| H | 0.05552100  | -1.88151300 | 2.08025500  |
| O | -3.19488500 | 1.07469400  | 0.54211600  |
| H | -3.38467400 | 0.43536600  | -0.17365800 |
| O | -2.86084800 | -0.98239400 | -1.12712500 |
| H | -3.53704200 | -1.58645100 | -1.47542200 |

29

G-sol = -943.604302 Hartree

|    |             |             |             |
|----|-------------|-------------|-------------|
| Ni | 0.10542600  | -0.44225000 | -0.00013400 |
| P  | 2.40171200  | -0.04392800 | 0.00038500  |
| C  | 3.35576100  | -1.63748500 | 0.00147700  |
| H  | 4.43691500  | -1.45736900 | 0.00170500  |
| H  | 3.09619100  | -2.22571800 | 0.88785400  |
| H  | 3.09674100  | -2.22665500 | -0.88445700 |
| C  | 3.15935800  | 0.83624500  | -1.44332500 |
| H  | 2.76581000  | 1.85547900  | -1.50057800 |
| H  | 4.25206000  | 0.87791800  | -1.36468700 |
| H  | 2.88598100  | 0.31757800  | -2.36763100 |
| C  | 3.15841600  | 0.83775400  | 1.44357400  |
| H  | 2.88468300  | 0.31995300  | 2.36822500  |
| H  | 4.25114400  | 0.87963900  | 1.36545800  |
| H  | 2.76461300  | 1.85695500  | 1.49962100  |
| C  | -1.59787000 | -1.26340300 | -0.00037900 |
| C  | -2.65074800 | -0.41967400 | 0.00051200  |
| C  | -0.88369000 | 1.17664000  | -0.00064100 |
| C  | -2.22383400 | 1.01103700  | 0.00034600  |
| C  | -4.11643900 | -0.78582500 | 0.00098500  |
| H  | -4.63733100 | -0.38296400 | 0.88147600  |
| H  | -4.63792500 | -0.38287200 | -0.87911400 |
| H  | -4.26725900 | -1.86915800 | 0.00099300  |
| C  | -1.61920900 | -2.76896500 | -0.00147800 |
| H  | -1.10375300 | -3.18113900 | -0.88381500 |
| H  | -1.10186300 | -3.18261600 | 0.87905600  |
| H  | -2.63491300 | -3.19031300 | -0.00070800 |
| C  | -0.10983200 | 2.46224200  | -0.00227500 |
| H  | 0.54167400  | 2.55118200  | 0.88031300  |

|   |             |            |             |
|---|-------------|------------|-------------|
| H | 0.54028600  | 2.54951300 | -0.88607300 |
| H | -0.76365200 | 3.34531900 | -0.00262200 |
| C | -3.25753200 | 2.11455600 | 0.00106200  |
| H | -3.91318500 | 2.04864400 | -0.87855500 |
| H | -3.91189600 | 2.04856500 | 0.88159600  |
| H | -2.80821200 | 3.11123300 | 0.00075700  |

29b

G-sol = -1697.676288 Hartree

|    |             |             |             |
|----|-------------|-------------|-------------|
| Ni | -0.12921200 | 0.99774600  | -0.16134000 |
| P  | -1.13771600 | 2.86878000  | 0.07925500  |
| C  | -2.01283100 | 2.99569700  | 1.69447200  |
| H  | -2.52878100 | 3.95794600  | 1.79125600  |
| H  | -2.73653600 | 2.17704200  | 1.74840100  |
| H  | -1.29400400 | 2.88687800  | 2.51220900  |
| C  | -0.06456800 | 4.36792600  | 0.01493100  |
| H  | 0.43867300  | 4.41682000  | -0.95544300 |
| H  | -0.64896400 | 5.28285700  | 0.16722900  |
| H  | 0.70310100  | 4.29559300  | 0.79102300  |
| C  | -2.46235800 | 3.21285200  | -1.15439800 |
| H  | -3.22455800 | 2.43319400  | -1.07032900 |
| H  | -2.92440700 | 4.19029200  | -0.97484100 |
| H  | -2.04529200 | 3.19110100  | -2.16560500 |
| C  | 1.66210600  | 0.50105000  | 0.21437300  |
| C  | 1.11425900  | -0.70470200 | -0.05326500 |
| C  | -1.41899600 | -0.35825000 | -0.28131400 |
| C  | -0.41531100 | -1.13219100 | 0.14668500  |
| C  | -2.87486900 | -0.49074800 | -0.26261800 |
| O  | -3.60550500 | 0.15773600  | 0.47279100  |
| O  | -3.32951100 | -1.32748700 | -1.21308500 |
| C  | -0.51973600 | -2.40634600 | 0.91782500  |
| O  | 0.42303400  | -2.97617100 | 1.42870700  |
| O  | -1.79441900 | -2.83798400 | 1.00645700  |
| C  | 1.83238300  | -1.79225000 | -0.80460200 |
| O  | 1.28567600  | -2.57941900 | -1.54819900 |
| O  | 3.15711400  | -1.76896400 | -0.57281200 |
| C  | 3.03718800  | 0.95842300  | 0.00094700  |
| O  | 3.45435100  | 1.40838300  | -1.05061700 |
| O  | 3.75788600  | 0.92063700  | 1.14342600  |
| C  | -4.75788100 | -1.44552000 | -1.30080700 |
| H  | -5.21768600 | -0.46873000 | -1.47558800 |
| H  | -4.94211400 | -2.11316200 | -2.14271600 |
| H  | -5.16393500 | -1.86966400 | -0.37842100 |
| C  | -1.97489500 | -4.05554500 | 1.74557700  |

|   |             |             |             |
|---|-------------|-------------|-------------|
| H | -3.04545400 | -4.25969900 | 1.71219800  |
| H | -1.41239400 | -4.87052500 | 1.28255200  |
| H | -1.63897300 | -3.93127400 | 2.77861100  |
| C | 3.91928100  | -2.74665700 | -1.29746900 |
| H | 4.95365700  | -2.59546300 | -0.98787000 |
| H | 3.58350800  | -3.75515500 | -1.04281600 |
| H | 3.81365000  | -2.59292500 | -2.37469700 |
| C | 5.09371600  | 1.43222500  | 1.03757100  |
| H | 5.68341900  | 0.82838700  | 0.34207400  |
| H | 5.08624700  | 2.46840200  | 0.68722100  |
| H | 5.51058500  | 1.36986700  | 2.04346200  |

29c

G-sol = -1172.529612 Hartree

|    |             |             |             |
|----|-------------|-------------|-------------|
| Ni | 0.84635600  | -0.04675700 | 0.02532200  |
| P  | 2.98718100  | -0.02074200 | 0.00326800  |
| C  | 3.77411000  | -0.84671300 | -1.45495700 |
| H  | 4.86793500  | -0.77855600 | -1.41805700 |
| H  | 3.48104900  | -1.90097000 | -1.47820000 |
| H  | 3.41251800  | -0.37517000 | -2.37348200 |
| C  | 3.77108100  | 1.65711900  | -0.03548600 |
| H  | 3.47036200  | 2.21912500  | 0.85439200  |
| H  | 4.86543400  | 1.59587200  | -0.06716200 |
| H  | 3.41500000  | 2.20094400  | -0.91569100 |
| C  | 3.86672700  | -0.81554300 | 1.42538300  |
| H  | 3.57441400  | -1.86826100 | 1.48810000  |
| H  | 4.95648800  | -0.74838500 | 1.32339100  |
| H  | 3.56022100  | -0.32681600 | 2.35526900  |
| C  | -0.04070300 | 0.97549000  | -1.27134900 |
| C  | -1.03040300 | 0.72334400  | -0.40036600 |
| C  | -1.07708700 | -0.68971700 | 0.38563300  |
| C  | -0.14862500 | -1.00294800 | 1.30795600  |
| C  | -2.08388600 | 1.74481400  | 0.12209800  |
| C  | -2.45502900 | 2.74127900  | -0.98957000 |
| C  | -1.51243700 | 2.46986000  | 1.34757300  |
| H  | -1.59745900 | 3.34295900  | -1.30827700 |
| H  | -2.84641900 | 2.21043800  | -1.86455200 |
| H  | -3.23303900 | 3.41492600  | -0.61580400 |
| H  | -2.29038800 | 3.10519200  | 1.78615600  |
| H  | -1.19217900 | 1.74404600  | 2.10148200  |
| H  | -0.65484000 | 3.09029300  | 1.06935500  |
| C  | -2.14358900 | -1.68601900 | -0.12580900 |
| C  | -1.46464600 | -2.84890300 | -0.86585400 |
| C  | -3.00875600 | -2.18334800 | 1.04243400  |

|   |             |             |             |
|---|-------------|-------------|-------------|
| H | -0.81433500 | -3.41181400 | -0.18947900 |
| H | -2.21643000 | -3.54079500 | -1.27166800 |
| H | -0.85858100 | -2.46607200 | -1.69275700 |
| H | -3.78122100 | -2.87372400 | 0.67664200  |
| H | -2.40503600 | -2.71974400 | 1.78037400  |
| H | -3.48905600 | -1.33395200 | 1.53453800  |
| H | 0.02640000  | 1.82358300  | -1.94623400 |
| H | -0.18278100 | -1.87369300 | 1.95975700  |
| O | -3.26886600 | 1.10175300  | 0.58350300  |
| H | -3.51602900 | 0.45679000  | -0.10870900 |
| O | -2.99352600 | -0.99619600 | -1.07809200 |
| H | -3.63911600 | -1.64263600 | -1.40683500 |

30

G-sol = -1099.455206 Hartree

|    |             |             |             |
|----|-------------|-------------|-------------|
| Ni | 0.31903200  | 0.51944100  | 0.00428500  |
| P  | 1.41826200  | -1.50319800 | 0.01316300  |
| C  | 0.32704100  | -2.97491400 | -0.23406200 |
| H  | 0.87535200  | -3.91881100 | -0.13430000 |
| H  | -0.48171700 | -2.93674700 | 0.50150800  |
| H  | -0.12844700 | -2.92214600 | -1.22702800 |
| C  | 2.73256800  | -1.78773700 | -1.26677600 |
| H  | 3.53488400  | -1.05542000 | -1.13248000 |
| H  | 3.15600200  | -2.79750300 | -1.20399200 |
| H  | 2.31003900  | -1.64420400 | -2.26649200 |
| C  | 2.32788300  | -1.96694600 | 1.56252200  |
| H  | 1.63184500  | -1.97706400 | 2.40703500  |
| H  | 2.79506900  | -2.95546300 | 1.47791100  |
| H  | 3.10350600  | -1.22320100 | 1.77104900  |
| C  | -1.08207700 | 0.10072800  | -1.23722400 |
| C  | -2.27854900 | -0.29192100 | -0.74362700 |
| C  | -1.09617300 | 0.11580600  | 1.23491400  |
| C  | -2.28887300 | -0.27936300 | 0.73172000  |
| C  | -3.49932000 | -0.69117100 | -1.54064000 |
| H  | -3.83176600 | -1.70862700 | -1.29002000 |
| H  | -4.35104500 | -0.02733800 | -1.33513600 |
| H  | -3.31724900 | -0.66203500 | -2.61877600 |
| C  | -0.66898600 | 0.28010500  | -2.67094400 |
| H  | -0.50958500 | 1.33972300  | -2.91720400 |
| H  | 0.27846100  | -0.22957900 | -2.89910400 |
| H  | -1.42107700 | -0.11074000 | -3.37112700 |
| C  | -0.71580700 | 0.35582200  | 2.66995100  |
| H  | 0.27079100  | -0.06127500 | 2.91467000  |
| H  | -0.65579800 | 1.43060200  | 2.89586000  |



|   |             |             |             |
|---|-------------|-------------|-------------|
| H | -1.43782400 | -0.08756600 | 3.37085000  |
| C | -3.52666900 | -0.63958300 | 1.52092500  |
| H | -4.35140900 | 0.05916400  | 1.31960000  |
| H | -3.89794900 | -1.64054000 | 1.26014800  |
| H | -3.34629100 | -0.62650000 | 2.59980400  |
| C | 1.69972500  | 1.91308600  | -0.00678100 |
| C | 0.51497500  | 2.39634600  | -0.01578000 |
| C | -0.44049800 | 3.52926100  | -0.03834400 |
| H | -1.09437700 | 3.50071300  | 0.84098700  |
| H | 0.07494900  | 4.49913600  | -0.05609500 |
| H | -1.09202200 | 3.46639300  | -0.91751200 |
| C | 3.16195000  | 2.19286900  | -0.01116300 |
| H | 3.37902900  | 3.26989400  | -0.04014800 |
| H | 3.64617700  | 1.77848800  | 0.88193100  |
| H | 3.65047700  | 1.72993400  | -0.87749400 |

30b

G-sol = -2230.584413 Hartree

|    |             |             |             |
|----|-------------|-------------|-------------|
| Ni | 0.73768400  | -0.10898400 | -0.22140300 |
| P  | 0.94111800  | -1.05607500 | -2.29722500 |
| C  | -0.67089700 | -1.46035900 | -3.09459900 |
| H  | -0.51903100 | -1.85528200 | -4.10533600 |
| H  | -1.21659100 | -2.19330700 | -2.49431600 |
| H  | -1.27729400 | -0.55157800 | -3.15290300 |
| C  | 1.74854000  | 0.07750100  | -3.50444000 |
| H  | 2.77772300  | 0.25011100  | -3.17769100 |
| H  | 1.74765300  | -0.36086800 | -4.50940900 |
| H  | 1.21242200  | 1.03026100  | -3.51186200 |
| C  | 1.91733600  | -2.61181800 | -2.42917300 |
| H  | 1.54226300  | -3.33988100 | -1.70659000 |
| H  | 1.86582700  | -3.02156100 | -3.44443400 |
| H  | 2.95895800  | -2.38514600 | -2.18493400 |
| C  | -0.68199800 | 1.15281300  | -0.37052700 |
| C  | -1.95300700 | 0.72306300  | -0.15306300 |
| C  | -0.72158800 | -1.19291900 | 0.33184200  |
| C  | -1.96953800 | -0.66266500 | 0.30327000  |
| C  | 2.60619700  | 0.08260900  | 0.28790400  |
| C  | 1.84000700  | 0.69935600  | 1.10660400  |
| C  | -0.29102400 | -2.50248500 | 0.83208700  |
| O  | 0.82067400  | -2.97880900 | 0.63604300  |
| O  | -1.23667500 | -3.14025100 | 1.55882200  |
| C  | -0.22524200 | 2.45729100  | -0.90813100 |
| O  | 0.06457200  | 2.64830700  | -2.07724600 |
| O  | -0.05390500 | 3.36479700  | 0.06709300  |

|   |             |             |             |
|---|-------------|-------------|-------------|
| C | -3.20351400 | 1.46607100  | -0.43966400 |
| O | -4.30315900 | 0.94849400  | -0.50172500 |
| O | -2.99018000 | 2.78312200  | -0.65759600 |
| C | -3.22738000 | -1.34265300 | 0.76846200  |
| O | -3.78839100 | -1.07918800 | 1.80695000  |
| O | -3.64633500 | -2.26679000 | -0.11749000 |
| C | -4.87558900 | -2.92171800 | 0.23382200  |
| H | -4.76612500 | -3.45936500 | 1.17975400  |
| H | -5.68024800 | -2.18811700 | 0.32837800  |
| H | -5.08097200 | -3.61594900 | -0.58182100 |
| C | -0.86314800 | -4.42706900 | 2.07380100  |
| H | -0.63794600 | -5.11978200 | 1.25778400  |
| H | 0.01417800  | -4.34076000 | 2.72006400  |
| H | -1.72650300 | -4.77271900 | 2.64299600  |
| C | -4.15674100 | 3.54362600  | -1.00429500 |
| H | -4.60350300 | 3.16360300  | -1.92722300 |
| H | -4.89855300 | 3.49312900  | -0.20296400 |
| H | -3.80728300 | 4.56731900  | -1.14112100 |
| C | 0.53750800  | 4.61382800  | -0.33145600 |
| H | 1.48258000  | 4.43852800  | -0.85084300 |
| H | -0.14189900 | 5.16281000  | -0.98927900 |
| H | 0.70673800  | 5.16005200  | 0.59577000  |
| C | 1.67582200  | 1.64746300  | 2.21516100  |
| O | 2.20479900  | 2.73933500  | 2.24874900  |
| O | 0.85912800  | 1.15578800  | 3.16022200  |
| C | 3.96113000  | -0.28087300 | -0.11856400 |
| O | 4.37444700  | -0.24989900 | -1.26407500 |
| O | 4.69417100  | -0.68546500 | 0.93541900  |
| C | 0.61382100  | 2.02984200  | 4.27602200  |
| H | -0.05231900 | 1.47416200  | 4.93535100  |
| H | 1.54998000  | 2.27335400  | 4.78547300  |
| H | 0.13744400  | 2.95225900  | 3.93426000  |
| C | 6.03316100  | -1.11211900 | 0.62592100  |
| H | 6.60930700  | -0.28466800 | 0.20376200  |
| H | 6.45956700  | -1.43298100 | 1.57624200  |
| H | 6.01539700  | -1.93920800 | -0.08867000 |

30c

G-sol = -1442.869189 Hartree

|    |             |             |             |
|----|-------------|-------------|-------------|
| Ni | -0.84269700 | -0.34925500 | -0.03745100 |
| P  | -1.33230400 | 1.86424500  | -0.34076300 |
| C  | 0.12405300  | 2.98110600  | -0.55275400 |
| H  | -0.18186600 | 4.02691300  | -0.67093900 |
| H  | 0.77850800  | 2.88842600  | 0.31840000  |

|   |             |             |             |
|---|-------------|-------------|-------------|
| H | 0.69695900  | 2.66613300  | -1.42937700 |
| C | -2.37546200 | 2.28174600  | -1.81025900 |
| H | -3.32901600 | 1.75759200  | -1.70735100 |
| H | -2.55036300 | 3.36153600  | -1.89085900 |
| H | -1.87917600 | 1.93412900  | -2.72242600 |
| C | -2.25586800 | 2.66919100  | 1.04419100  |
| H | -1.67991800 | 2.57223200  | 1.97029900  |
| H | -2.43700700 | 3.73282400  | 0.84759200  |
| H | -3.20774100 | 2.14570900  | 1.16449900  |
| C | 0.66816900  | -0.49907700 | -1.16126900 |
| C | 1.93229300  | -0.43342400 | -0.68724100 |
| C | 0.59447100  | -0.22741800 | 1.18303700  |
| C | 1.88748300  | -0.24404200 | 0.79674900  |
| C | -2.56411800 | -1.25064500 | 0.16459700  |
| C | -1.56658300 | -2.05143000 | 0.24575700  |
| C | 3.05316900  | 0.01804300  | 1.77126300  |
| C | 3.34366500  | 1.53454300  | 1.83683100  |
| C | 2.74823900  | -0.51821500 | 3.17610700  |
| H | 2.47911800  | 2.08524200  | 2.22573000  |
| H | 4.20260100  | 1.71727800  | 2.49349200  |
| H | 3.57994600  | 1.92272000  | 0.84048500  |
| H | 3.62450900  | -0.35757600 | 3.81276000  |
| H | 1.89276700  | -0.01150000 | 3.63279000  |
| H | 2.54064000  | -1.59177400 | 3.13645800  |
| C | 3.15313900  | -0.67177100 | -1.57249700 |
| C | 3.69194100  | -2.10446900 | -1.38519100 |
| C | 2.86752200  | -0.40681500 | -3.05794800 |
| H | 3.92827600  | -2.28734900 | -0.33462700 |
| H | 2.94331500  | -2.83363200 | -1.71177400 |
| H | 4.59919900  | -2.25732600 | -1.98769500 |
| H | 2.48760400  | 0.60825300  | -3.20501900 |
| H | 3.79447900  | -0.51909800 | -3.63592000 |
| H | 2.14407500  | -1.11785300 | -3.46728300 |
| O | 4.24697700  | -0.66650600 | 1.38074400  |
| H | 4.49450600  | -0.28601500 | 0.51336200  |
| O | 4.17747300  | 0.28514100  | -1.16132300 |
| H | 4.95565900  | 0.12748700  | -1.72213600 |
| H | 0.22844100  | -0.10282000 | 2.20452100  |
| H | 0.39603400  | -0.69547000 | -2.20157500 |
| C | -4.05128000 | -1.15003200 | 0.21002300  |
| C | -4.67241800 | -1.99600900 | -0.91717000 |
| C | -4.56641400 | -1.59996900 | 1.59003600  |
| H | -4.31177200 | -1.65170400 | -1.89078900 |
| H | -4.41453900 | -3.05347000 | -0.80201300 |
| H | -5.76745600 | -1.90869700 | -0.90059800 |
| H | -4.12856000 | -0.98008700 | 2.37776100  |

|   |             |             |            |
|---|-------------|-------------|------------|
| H | -5.65975700 | -1.50463400 | 1.63877900 |
| H | -4.30796300 | -2.64583500 | 1.78323700 |
| H | -1.16610200 | -3.04276000 | 0.39573300 |
| O | -4.40703000 | 0.23674400  | 0.00533200 |
| H | -5.37670100 | 0.28567200  | 0.04095400 |

TS31 (Imaginary Frequency = -282.32)

G-sol = -1099.437292 Hartree

|    |             |             |             |
|----|-------------|-------------|-------------|
| Ni | 0.26383900  | 0.26698600  | -0.23783700 |
| P  | 2.13360900  | -0.73509900 | 0.37005900  |
| C  | 1.94392700  | -2.35983600 | 1.23642600  |
| H  | 2.91103400  | -2.78702100 | 1.52741800  |
| H  | 1.32855200  | -2.21765100 | 2.13039100  |
| H  | 1.41884300  | -3.06063400 | 0.58134700  |
| C  | 3.35152100  | -1.14813100 | -0.96440500 |
| H  | 3.65836500  | -0.22815200 | -1.47162000 |
| H  | 4.23953400  | -1.64932300 | -0.56157500 |
| H  | 2.87721400  | -1.80062200 | -1.70361000 |
| C  | 3.19213200  | 0.20306600  | 1.56676800  |
| H  | 2.61045700  | 0.42743200  | 2.46653600  |
| H  | 4.08745900  | -0.36179600 | 1.85323400  |
| H  | 3.49267900  | 1.15292300  | 1.11502500  |
| C  | -0.77946100 | -1.24854700 | -0.82587700 |
| C  | -2.03271100 | -1.30014000 | -0.30173200 |
| C  | -1.33088700 | 0.68847900  | 0.86054800  |
| C  | -2.25968900 | -0.30265600 | 0.75388100  |
| C  | -3.14634700 | -2.24789400 | -0.69860600 |
| H  | -3.47463700 | -2.86725600 | 0.14779300  |
| H  | -4.03726200 | -1.70951900 | -1.05335000 |
| H  | -2.83868200 | -2.93078000 | -1.49515000 |
| C  | -0.28717500 | -2.05584100 | -1.99837400 |
| H  | 0.21612700  | -1.40136200 | -2.72707100 |
| H  | 0.46189800  | -2.80664200 | -1.70102700 |
| H  | -1.07875900 | -2.59251400 | -2.54081500 |
| C  | -1.18745900 | 1.65918300  | 2.00448700  |
| H  | -0.13363900 | 1.76387300  | 2.28873600  |
| H  | -1.53980800 | 2.67124300  | 1.75534500  |
| H  | -1.73015700 | 1.32109100  | 2.89554700  |
| C  | -3.43950700 | -0.45334800 | 1.69161600  |
| H  | -4.38080100 | -0.49241800 | 1.12685600  |
| H  | -3.38279100 | -1.39019600 | 2.26394800  |
| H  | -3.52233300 | 0.37102300  | 2.40366500  |
| C  | 0.58396900  | 2.13021700  | -0.59167300 |
| C  | -0.68628800 | 1.86300900  | -0.71682900 |

|   |             |            |             |
|---|-------------|------------|-------------|
| C | -1.96373800 | 2.33814800 | -1.32024700 |
| H | -2.60985400 | 2.81887600 | -0.57528400 |
| H | -1.75727100 | 3.06924700 | -2.11325300 |
| H | -2.52399900 | 1.50178700 | -1.75163600 |
| C | 1.53065800  | 3.24949500 | -0.86116000 |
| H | 1.08042200  | 4.05274000 | -1.46335700 |
| H | 1.86939100  | 3.70141100 | 0.08221800  |
| H | 2.43270900  | 2.90390300 | -1.38069600 |

TS31b (Imaginary Frequency = -204.78)

G-sol = -2230.571237 Hartree

|    |             |             |             |
|----|-------------|-------------|-------------|
| Ni | -0.64300100 | -0.63878300 | -0.22601100 |
| P  | -1.36160600 | -2.12752800 | -1.75230500 |
| C  | -0.10374600 | -2.54546000 | -3.03041500 |
| H  | -0.52190100 | -3.21509600 | -3.79097900 |
| H  | 0.24420300  | -1.62612100 | -3.51174400 |
| H  | 0.74316400  | -3.02567100 | -2.53321800 |
| C  | -1.92736400 | -3.76276100 | -1.11780800 |
| H  | -2.74288000 | -3.60213500 | -0.40639900 |
| H  | -2.27988600 | -4.39783300 | -1.93872800 |
| H  | -1.09268600 | -4.25786200 | -0.61382600 |
| C  | -2.80014900 | -1.50232100 | -2.71725700 |
| H  | -2.57167900 | -0.50111300 | -3.09302200 |
| H  | -3.03391600 | -2.17239800 | -3.55234200 |
| H  | -3.66369100 | -1.43348100 | -2.05030600 |
| C  | 1.15806900  | -1.22129100 | 0.06376300  |
| C  | 2.09395900  | -0.23410800 | -0.00720600 |
| C  | 0.16556400  | 1.11788900  | -0.42448300 |
| C  | 1.52733500  | 1.05070200  | -0.40994900 |
| C  | -2.26912700 | 0.09579900  | 0.49312500  |
| C  | -1.24278700 | 0.63719700  | 1.07135200  |
| C  | -0.60287700 | 2.08770700  | -1.23334800 |
| O  | -1.59184300 | 1.79388300  | -1.88528800 |
| O  | -0.08670100 | 3.33362700  | -1.19904600 |
| C  | 2.40703200  | 2.12988300  | -0.99937100 |
| O  | 2.75259700  | 2.13292200  | -2.16128900 |
| O  | 2.74601100  | 3.04758200  | -0.08865800 |
| C  | 1.38123100  | -2.61513900 | 0.50371800  |
| O  | 1.45285600  | -3.57816900 | -0.24337200 |
| O  | 1.36117200  | -2.72451600 | 1.84912200  |
| C  | 3.55080700  | -0.36184900 | 0.24955600  |
| O  | 4.35178500  | 0.54847400  | 0.14178800  |
| O  | 3.90927300  | -1.61734500 | 0.60144500  |
| C  | -0.70464200 | 4.28373000  | -2.08268000 |

|   |             |             |             |
|---|-------------|-------------|-------------|
| H | -1.76636300 | 4.39079800  | -1.84682500 |
| H | -0.17573800 | 5.22193100  | -1.91348600 |
| H | -0.59648800 | 3.96468800  | -3.12286800 |
| C | 3.69250200  | 4.02857000  | -0.53850200 |
| H | 4.62576400  | 3.53927700  | -0.82908700 |
| H | 3.29413900  | 4.58674700  | -1.39022900 |
| H | 3.85349100  | 4.68909100  | 0.31385200  |
| C | 5.31030200  | -1.81060200 | 0.83990100  |
| H | 5.88960500  | -1.55992300 | -0.05274100 |
| H | 5.64854500  | -1.18500500 | 1.67055000  |
| H | 5.42166500  | -2.86738900 | 1.08462900  |
| C | 1.50259700  | -4.05761400 | 2.36509400  |
| H | 0.69489900  | -4.70084500 | 2.00483800  |
| H | 2.46162000  | -4.48468800 | 2.05996800  |
| H | 1.45578900  | -3.95562100 | 3.44954600  |
| C | -0.80088800 | 1.31499500  | 2.30908700  |
| O | 0.31545000  | 1.70892400  | 2.55875600  |
| O | -1.84879900 | 1.41004300  | 3.15982500  |
| C | -3.71200400 | -0.08952600 | 0.54538500  |
| O | -4.26218600 | -1.17698200 | 0.48121200  |
| O | -4.37230700 | 1.08081600  | 0.64155600  |
| C | -1.54533100 | 2.02596200  | 4.42241900  |
| H | -2.48266400 | 2.02143000  | 4.97926500  |
| H | -0.77810700 | 1.45547700  | 4.95282000  |
| H | -1.18927100 | 3.04897200  | 4.27380400  |
| C | -5.80601600 | 0.97737400  | 0.64464200  |
| H | -6.14735300 | 0.41621100  | 1.51869400  |
| H | -6.16972000 | 2.00438000  | 0.68136400  |
| H | -6.15768600 | 0.47611700  | -0.26122700 |

TS31c (Imaginary Frequency = -232.11)

G-sol = -1442.857416 Hartree

|    |             |            |             |
|----|-------------|------------|-------------|
| Ni | -0.76513200 | 0.12538500 | -0.12635200 |
| P  | -1.82425400 | 1.85606900 | 0.74875900  |
| C  | -0.77738600 | 3.23956000 | 1.38580000  |
| H  | -1.38880700 | 4.04314000 | 1.81299400  |
| H  | -0.09789800 | 2.85500300 | 2.15232800  |
| H  | -0.16637600 | 3.64164200 | 0.57307800  |
| C  | -3.00587100 | 2.72064900 | -0.37813600 |
| H  | -3.75228800 | 1.98984500 | -0.69994300 |
| H  | -3.49775800 | 3.56317100 | 0.12245400  |
| H  | -2.47133500 | 3.09268900 | -1.25830800 |
| C  | -2.87693900 | 1.44499600 | 2.20981500  |
| H  | -2.25912200 | 0.98279500 | 2.98649500  |

|   |             |             |             |
|---|-------------|-------------|-------------|
| H | -3.35874800 | 2.33952600  | 2.62250200  |
| H | -3.63468300 | 0.72710600  | 1.88671300  |
| C | 0.80708500  | 1.05827500  | -0.67239400 |
| C | 2.00480200  | 0.44780900  | -0.51019400 |
| C | 0.55209700  | -1.20461500 | 0.42439000  |
| C | 1.84150400  | -0.79548000 | 0.30824000  |
| C | -2.12699300 | -1.19284500 | -0.52236600 |
| C | -0.96796800 | -1.63035000 | -0.89667200 |
| H | 0.71390700  | 1.92799600  | -1.33053700 |
| H | 0.25410400  | -1.98548100 | 1.11473600  |
| C | 3.28917300  | 0.89707500  | -1.23788100 |
| C | 3.52282400  | -0.00882300 | -2.46795700 |
| C | 3.22205700  | 2.36342900  | -1.68398700 |
| H | 2.68938600  | 0.06716100  | -3.17567900 |
| H | 4.44783300  | 0.28887100  | -2.97643400 |
| H | 3.61821900  | -1.05612100 | -2.16354400 |
| H | 4.19689800  | 2.64218000  | -2.09638900 |
| H | 2.46218200  | 2.52784700  | -2.45343600 |
| H | 3.01047900  | 3.01666100  | -0.83145500 |
| C | 2.92840100  | -1.45236700 | 1.17261100  |
| C | 3.39057400  | -0.47896500 | 2.27526500  |
| C | 2.50167600  | -2.78829800 | 1.79842200  |
| H | 2.56120200  | -0.25454300 | 2.95444700  |
| H | 4.19951500  | -0.92949300 | 2.86788000  |
| H | 3.75152300  | 0.45230800  | 1.83365900  |
| H | 3.36196100  | -3.23521900 | 2.31402800  |
| H | 1.71185200  | -2.66112500 | 2.54453800  |
| H | 2.15854800  | -3.48943300 | 1.03237900  |
| O | 4.44638100  | 0.84662200  | -0.39045800 |
| H | 4.57658800  | -0.10019300 | -0.18246600 |
| O | 4.05079900  | -1.75049200 | 0.28789500  |
| H | 4.74005200  | -2.16654000 | 0.83300600  |
| C | -3.56979900 | -1.54989300 | -0.65265100 |
| C | -3.93324700 | -1.83598200 | -2.12164900 |
| C | -3.89281400 | -2.76131300 | 0.24291600  |
| H | -3.71536200 | -0.96191700 | -2.74213600 |
| H | -3.36355300 | -2.68782300 | -2.50720500 |
| H | -5.00189600 | -2.07364000 | -2.21674700 |
| H | -3.64436500 | -2.53854200 | 1.28480900  |
| H | -4.96271600 | -3.00441500 | 0.18532300  |
| H | -3.32706500 | -3.64432300 | -0.07108800 |
| O | -4.34274500 | -0.41335100 | -0.19432600 |
| H | -5.27915700 | -0.65130700 | -0.29677700 |
| H | -0.43614000 | -2.36906400 | -1.47907000 |

G-sol = -1099.462948 Hartree

|    |             |             |             |
|----|-------------|-------------|-------------|
| Ni | -0.34164600 | 0.28831000  | -0.26664800 |
| C  | 0.18427800  | 2.05858700  | -0.42174700 |
| C  | 1.44850000  | 1.53621500  | -0.37637000 |
| C  | 1.95389000  | -0.74799100 | 0.74706800  |
| C  | 1.85129500  | 0.61292000  | 0.77405200  |
| C  | 2.60281300  | 1.90599100  | -1.29220600 |
| H  | 3.45959900  | 2.28870000  | -0.72028200 |
| H  | 2.94921000  | 1.01237400  | -1.82762400 |
| H  | 2.32180400  | 2.65925900  | -2.03470400 |
| C  | -0.25983300 | 3.30455800  | -1.12399600 |
| H  | 0.53240600  | 3.80721200  | -1.69858900 |
| H  | -1.10378100 | 3.11270200  | -1.79813800 |
| H  | -0.62057900 | 4.02794600  | -0.37780800 |
| C  | 2.48616400  | -1.50838100 | 1.95894700  |
| H  | 2.18459900  | -2.55895200 | 1.91945500  |
| H  | 3.58403100  | -1.48786200 | 2.01089500  |
| H  | 2.10938200  | -1.09892500 | 2.90083600  |
| C  | 2.24213300  | 1.42823000  | 1.99889600  |
| H  | 2.89318100  | 0.88932100  | 2.69196600  |
| H  | 2.76754700  | 2.34182200  | 1.69477200  |
| H  | 1.34953700  | 1.75348200  | 2.55098500  |
| C  | 0.27922200  | -1.41225900 | -0.90604000 |
| C  | 1.52164300  | -1.60970700 | -0.40201300 |
| C  | 2.53469900  | -2.64410000 | -0.86806300 |
| H  | 2.76508600  | -3.38429200 | -0.08916700 |
| H  | 2.18580400  | -3.19587000 | -1.74462400 |
| H  | 3.48812300  | -2.16692900 | -1.13563500 |
| C  | -0.34664600 | -2.22751500 | -2.00779900 |
| H  | 0.32404200  | -2.96451500 | -2.47137500 |
| H  | -1.22001600 | -2.78565300 | -1.63750500 |
| H  | -0.72147200 | -1.57458500 | -2.80877300 |
| P  | -2.30839400 | -0.18552400 | 0.39366600  |
| C  | -3.54499000 | -0.49442900 | -0.94984600 |
| H  | -4.52763500 | -0.75317200 | -0.53775900 |
| H  | -3.64234300 | 0.40331600  | -1.56813400 |
| H  | -3.19562800 | -1.31069900 | -1.58809700 |
| C  | -3.16706500 | 1.09615900  | 1.41693000  |
| H  | -3.22143400 | 2.02906600  | 0.84848700  |
| H  | -4.17846200 | 0.78313900  | 1.70365000  |
| H  | -2.57932600 | 1.28797900  | 2.31988800  |
| C  | -2.48536300 | -1.69654300 | 1.44751200  |
| H  | -2.12109500 | -2.56742500 | 0.89552700  |
| H  | -1.86802400 | -1.58503700 | 2.34443200  |



H           -3.52700500  -1.86261700  1.74650600

32b

G-sol = -2230.599407 Hartree

|    |             |             |             |
|----|-------------|-------------|-------------|
| Ni | -0.41515000 | 0.78067500  | -0.48479700 |
| C  | -2.03778900 | 0.04805400  | 0.11227200  |
| C  | -1.32647700 | -0.95627700 | 0.67949700  |
| C  | 1.12780400  | -1.30815200 | -0.17984500 |
| C  | -0.21792600 | -1.54450700 | -0.18063100 |
| C  | 1.37341500  | 1.06715700  | 0.16188300  |
| C  | 1.82619200  | -0.16667600 | 0.47986800  |
| P  | -0.92299900 | 2.65772300  | -1.40748200 |
| C  | -1.13278900 | 4.03657100  | -0.21238600 |
| H  | -1.32805500 | 4.97816900  | -0.73869900 |
| H  | -1.97727400 | 3.78718400  | 0.43601000  |
| H  | -0.23635300 | 4.12864900  | 0.40606100  |
| C  | -2.48809400 | 2.67329400  | -2.37931000 |
| H  | -3.32327300 | 2.47893600  | -1.70207200 |
| H  | -2.63368100 | 3.64685100  | -2.86148000 |
| H  | -2.46027600 | 1.89178000  | -3.14418900 |
| C  | 0.33793700  | 3.24294100  | -2.62022300 |
| H  | 1.31685900  | 3.30129700  | -2.13730000 |
| H  | 0.41081000  | 2.52254200  | -3.44116100 |
| H  | 0.06613700  | 4.22432000  | -3.02592000 |
| C  | 2.00671700  | 2.33412300  | 0.57402400  |
| O  | 1.60566100  | 3.04719900  | 1.47615100  |
| O  | 3.02597000  | 2.68384900  | -0.24898100 |
| C  | 3.02414600  | -0.52928300 | 1.28133600  |
| O  | 3.43194500  | -1.67109500 | 1.39295100  |
| O  | 3.60555600  | 0.53193400  | 1.87650200  |
| C  | 2.05824200  | -2.13188400 | -1.04956200 |
| O  | 2.89478400  | -1.64708000 | -1.77873100 |
| O  | 1.86257900  | -3.44979300 | -0.87951600 |
| C  | -0.81288800 | -2.57788300 | -1.11143700 |
| O  | -1.62300900 | -3.40866300 | -0.76863900 |
| O  | -0.38813000 | -2.42149700 | -2.38602500 |
| C  | -1.51878900 | -1.59131700 | 2.01713000  |
| O  | -0.75212200 | -2.39701500 | 2.50208500  |
| O  | -2.62214800 | -1.12893400 | 2.64398600  |
| C  | -3.33147500 | 0.62220000  | 0.50399400  |
| O  | -3.50242300 | 1.78277400  | 0.84655000  |
| O  | -4.34399500 | -0.25150100 | 0.32749400  |
| C  | 3.69029700  | 3.91187000  | 0.08831700  |
| H  | 2.99003300  | 4.75197300  | 0.07751600  |
| H  | 4.14013800  | 3.83952700  | 1.08205000  |

|   |             |             |             |
|---|-------------|-------------|-------------|
| H | 4.46111700  | 4.04415300  | -0.67160200 |
| C | 4.76192700  | 0.23193800  | 2.67222200  |
| H | 4.51049900  | -0.48775500 | 3.45551500  |
| H | 5.55880500  | -0.18318000 | 2.04895500  |
| H | 5.07007300  | 1.18244000  | 3.10866600  |
| C | 2.76171400  | -4.29809100 | -1.61082700 |
| H | 2.65003100  | -4.13892400 | -2.68710400 |
| H | 3.79406300  | -4.08663200 | -1.32143700 |
| H | 2.48567800  | -5.31678500 | -1.33825800 |
| C | -0.89829200 | -3.38810200 | -3.31912800 |
| H | -0.58167000 | -4.39518900 | -3.03451100 |
| H | -1.99041400 | -3.35265100 | -3.34569000 |
| H | -0.47769500 | -3.10989400 | -4.28570700 |
| C | -2.85340600 | -1.67617600 | 3.95036100  |
| H | -3.76630100 | -1.19954500 | 4.30890700  |
| H | -2.98084100 | -2.76058300 | 3.89390900  |
| H | -2.01521100 | -1.44994200 | 4.61494400  |
| C | -5.65432500 | 0.25342300  | 0.62237400  |
| H | -5.73267300 | 0.51622300  | 1.68092600  |
| H | -5.87499000 | 1.13941200  | 0.02002800  |
| H | -6.34052000 | -0.55790300 | 0.37799900  |

32c

G-sol = -1442.890672 Hartree

|    |             |             |             |
|----|-------------|-------------|-------------|
| Ni | 0.87728400  | 0.28192400  | 0.27163700  |
| C  | 1.68289900  | -1.34762200 | -0.19244200 |
| C  | 0.55828800  | -2.02255400 | -0.56424900 |
| C  | -1.64496800 | -0.56817900 | -0.63664900 |
| C  | -0.70419500 | -1.44850500 | -1.08148300 |
| C  | -0.65152000 | 0.91904800  | 1.09251500  |
| C  | -1.67782000 | 0.12439800  | 0.70093900  |
| P  | 1.80211600  | 2.13795600  | -0.11101600 |
| C  | 2.03394800  | 3.18554500  | 1.39358800  |
| H  | 2.47889300  | 4.15496700  | 1.14107000  |
| H  | 2.68605100  | 2.66737500  | 2.10356100  |
| H  | 1.06497400  | 3.34551100  | 1.87425200  |
| C  | 3.48846600  | 2.16573400  | -0.87081800 |
| H  | 4.19070600  | 1.63087700  | -0.22471900 |
| H  | 3.84607800  | 3.19212100  | -1.01720300 |
| H  | 3.45831300  | 1.65325100  | -1.83688000 |
| C  | 0.85031600  | 3.24374900  | -1.24470400 |
| H  | -0.14288200 | 3.41549300  | -0.82157500 |
| H  | 0.72866100  | 2.75113300  | -2.21422100 |
| H  | 1.36131000  | 4.20260400  | -1.39157700 |

|   |             |             |             |
|---|-------------|-------------|-------------|
| C | -2.84190100 | -0.22118900 | 1.68118200  |
| C | -3.41017600 | 1.03506700  | 2.36687300  |
| C | -2.31309800 | -1.21914700 | 2.72425500  |
| H | -2.66227800 | 1.55383300  | 2.97494200  |
| H | -4.23891100 | 0.74066700  | 3.01991800  |
| H | -3.78727800 | 1.73913100  | 1.61709100  |
| H | -3.13078400 | -1.52420600 | 3.38751300  |
| H | -1.51201800 | -0.77277400 | 3.32093600  |
| H | -1.92128300 | -2.11231600 | 2.22722200  |
| C | -2.75223700 | -0.21180200 | -1.67104100 |
| C | -3.57503000 | -1.43701300 | -2.10906000 |
| C | -2.13296700 | 0.49987900  | -2.88734600 |
| H | -4.00385500 | -1.93111400 | -1.23444100 |
| H | -2.96002300 | -2.16261700 | -2.64933600 |
| H | -4.38472800 | -1.12754400 | -2.78455600 |
| H | -1.59436400 | 1.39585100  | -2.56448500 |
| H | -2.91996300 | 0.80227300  | -3.59316000 |
| H | -1.43671500 | -0.15079600 | -3.42374800 |
| C | 2.96840600  | -2.09165000 | 0.09662500  |
| C | 3.52031900  | -1.70129300 | 1.47980300  |
| C | 3.99988200  | -1.78221300 | -1.00719000 |
| H | 3.72146800  | -0.62618100 | 1.53876500  |
| H | 4.45960300  | -2.23401500 | 1.68727900  |
| H | 2.79584300  | -1.96011300 | 2.25823700  |
| H | 4.94100500  | -2.31499800 | -0.81020500 |
| H | 4.22466600  | -0.71297700 | -1.06253500 |
| H | 3.61438200  | -2.10861900 | -1.97817500 |
| H | -0.72287700 | 1.46288500  | 2.03866300  |
| H | -0.92647800 | -1.88104500 | -2.06118900 |
| H | 0.58849100  | -3.11561000 | -0.62190800 |
| O | -3.91211700 | -0.90798800 | 1.03246600  |
| H | -4.22466900 | -0.29458400 | 0.33999400  |
| O | -3.64885600 | 0.74255400  | -1.04157000 |
| H | -4.30435800 | 0.99570900  | -1.71148300 |
| O | 2.70805300  | -3.51129700 | 0.08793800  |
| H | 3.54902000  | -3.95705800 | 0.27588100  |

TS33 (Imaginary Frequency = -171.92)

G-sol = -1099.448535 Hartree

|    |             |             |             |
|----|-------------|-------------|-------------|
| Ni | 0.37447000  | -0.64712600 | -0.27689900 |
| C  | -1.08684200 | -1.90281700 | -0.28460100 |
| C  | -2.16307600 | -1.09593300 | -0.01624300 |
| C  | -1.46075300 | 1.31681400  | 0.54993500  |
| C  | -2.04836500 | 0.12546700  | 0.85288800  |

|   |             |             |             |
|---|-------------|-------------|-------------|
| C | -3.59055000 | -1.32303800 | -0.50185700 |
| H | -4.32512400 | -1.16582600 | 0.29852700  |
| H | -3.83458000 | -0.59704600 | -1.29078200 |
| H | -3.74871800 | -2.32352700 | -0.91160300 |
| C | -1.22283100 | -3.21754800 | -1.02121400 |
| H | -2.25109900 | -3.56756700 | -1.19915600 |
| H | -0.72342000 | -3.16270800 | -1.99929500 |
| H | -0.70323600 | -4.00963100 | -0.46625200 |
| C | -1.47739100 | 2.44356100  | 1.57943400  |
| H | -0.76147600 | 3.22890100  | 1.31740000  |
| H | -2.46504800 | 2.91943200  | 1.66652900  |
| H | -1.21526900 | 2.08036100  | 2.57993500  |
| C | -2.71372900 | -0.04633400 | 2.21623100  |
| H | -3.39882600 | 0.77296100  | 2.46844900  |
| H | -3.27389800 | -0.98330800 | 2.26853800  |
| H | -1.95532800 | -0.08706300 | 3.01103600  |
| C | 0.23265700  | 0.95269300  | -1.21604500 |
| C | -0.81023200 | 1.67230800  | -0.75566700 |
| C | -1.41953900 | 2.87131700  | -1.46576900 |
| H | -1.43180200 | 3.75945800  | -0.82025300 |
| H | -0.88193300 | 3.13884600  | -2.37904300 |
| H | -2.46443600 | 2.66750600  | -1.73777700 |
| C | 1.02527800  | 1.18514800  | -2.47516800 |
| H | 0.56411800  | 1.92598200  | -3.14091500 |
| H | 2.04286100  | 1.54081300  | -2.25662100 |
| H | 1.13496800  | 0.25518900  | -3.04818500 |
| P | 2.34275400  | -0.21206800 | 0.46709500  |
| C | 3.75205500  | -0.68945300 | -0.63397000 |
| H | 4.71672400  | -0.50701900 | -0.14630000 |
| H | 3.67094500  | -1.75198800 | -0.88239000 |
| H | 3.70834500  | -0.11791300 | -1.56525500 |
| C | 2.71067800  | -1.17222700 | 2.00612600  |
| H | 2.58499300  | -2.23989600 | 1.80372800  |
| H | 3.73076700  | -0.98598200 | 2.36342600  |
| H | 1.99797400  | -0.89235400 | 2.78790600  |
| C | 2.78489900  | 1.51298600  | 0.96907600  |
| H | 2.72684400  | 2.17452600  | 0.10043100  |
| H | 2.06241600  | 1.86861000  | 1.70980800  |
| H | 3.79321500  | 1.56210900  | 1.39592300  |

TS33b (Imaginary Frequency = -55.10)

G-sol = -2230.566709 Hartree

|    |             |             |             |
|----|-------------|-------------|-------------|
| Ni | -0.52878300 | -0.46020300 | -0.84258600 |
| C  | -1.30497300 | -0.82776600 | 0.77909000  |

|   |             |             |             |
|---|-------------|-------------|-------------|
| C | -0.16881300 | -0.90154300 | 1.50262200  |
| C | 1.69568500  | -0.30896900 | -0.07727800 |
| C | 0.93856000  | -1.27744100 | 0.56323900  |
| C | 0.07602800  | 1.32857500  | -0.49473500 |
| C | 1.31073000  | 1.13265900  | 0.00945000  |
| P | -2.18812400 | -0.40210300 | -2.22325800 |
| C | -3.12267500 | 1.16504800  | -2.41056100 |
| H | -3.89304400 | 1.06091100  | -3.18289800 |
| H | -3.58241600 | 1.40696800  | -1.44999900 |
| H | -2.42746100 | 1.96016600  | -2.68993500 |
| C | -3.48753700 | -1.70363600 | -2.12217900 |
| H | -4.06183100 | -1.55532900 | -1.20524100 |
| H | -4.16093700 | -1.64346200 | -2.98498300 |
| H | -3.01906500 | -2.69164500 | -2.09600900 |
| C | -1.42367100 | -0.67497800 | -3.88476100 |
| H | -0.68382500 | 0.10694500  | -4.07945600 |
| H | -0.91581500 | -1.64402800 | -3.91109800 |
| H | -2.18910800 | -0.65221200 | -4.66924600 |
| C | -0.60446400 | 2.62611200  | -0.58916400 |
| O | -1.29961100 | 3.10441900  | 0.28566700  |
| O | -0.43946900 | 3.20954300  | -1.81119600 |
| C | 2.32922800  | 2.08074600  | 0.51647400  |
| O | 3.48649000  | 1.75900200  | 0.71966600  |
| O | 1.85583500  | 3.33150600  | 0.68422200  |
| C | 2.88613800  | -0.61976900 | -0.95073100 |
| O | 2.99730500  | -0.23024700 | -2.09409400 |
| O | 3.81004100  | -1.33208800 | -0.29034700 |
| C | 1.13551400  | -2.75078100 | 0.35096500  |
| O | 0.93982700  | -3.59156900 | 1.19886000  |
| O | 1.54327800  | -3.04177600 | -0.91061400 |
| C | 0.16529100  | -0.34824000 | 2.83321400  |
| O | 1.29984900  | -0.28471800 | 3.26824400  |
| O | -0.92044200 | 0.10028900  | 3.49974100  |
| C | -2.70789500 | -0.64632900 | 1.18323000  |
| O | -3.51398800 | 0.08056400  | 0.61841700  |
| O | -3.04778700 | -1.46035100 | 2.20239400  |
| C | -1.05424600 | 4.49984200  | -1.94738100 |
| H | -2.13810000 | 4.43330700  | -1.81373700 |
| H | -0.65112800 | 5.19650100  | -1.20754100 |
| H | -0.81192900 | 4.83377500  | -2.95730000 |
| C | 2.81520300  | 4.29366700  | 1.14524100  |
| H | 3.25122000  | 3.97509100  | 2.09571700  |
| H | 3.61623300  | 4.41983500  | 0.41116200  |
| H | 2.25883500  | 5.22312000  | 1.26993700  |
| C | 5.02252200  | -1.58423300 | -1.01832900 |
| H | 4.81534100  | -2.17483800 | -1.91526600 |

|   |             |             |             |
|---|-------------|-------------|-------------|
| H | 5.49044500  | -0.64028500 | -1.30839300 |
| H | 5.66389700  | -2.13595200 | -0.33104900 |
| C | 1.83420300  | -4.42732100 | -1.15144200 |
| H | 2.63279400  | -4.76981200 | -0.48797700 |
| H | 0.94443800  | -5.03947200 | -0.98204300 |
| H | 2.14859300  | -4.48279600 | -2.19403500 |
| C | -0.64991900 | 0.66688700  | 4.78880100  |
| H | -1.61974900 | 0.97367200  | 5.18209600  |
| H | -0.18473000 | -0.07356700 | 5.44564700  |
| H | 0.01600500  | 1.52930500  | 4.69751100  |
| C | -4.40805200 | -1.35973100 | 2.64713800  |
| H | -4.61634900 | -0.35163700 | 3.01577500  |
| H | -5.10191700 | -1.59070600 | 1.83352400  |
| H | -4.50436400 | -2.09000900 | 3.45103500  |

TS33c (Imaginary Frequency = -143.02)

G-sol = -1442.885663 Hartree

|    |             |             |             |
|----|-------------|-------------|-------------|
| Ni | 1.09972900  | 0.37525700  | 0.20252800  |
| C  | 1.80632800  | -1.34881500 | -0.26963800 |
| C  | 0.72456200  | -2.06302200 | -0.70637200 |
| C  | -1.52622300 | -0.71314200 | -0.65376900 |
| C  | -0.57542700 | -1.55573800 | -1.15305700 |
| C  | -0.45338700 | 0.66691300  | 1.11171800  |
| C  | -1.50889600 | -0.06703800 | 0.70174800  |
| P  | 1.36091200  | 2.46596800  | -0.11023100 |
| C  | 1.32093600  | 3.55850500  | 1.38050900  |
| H  | 1.54806500  | 4.59760500  | 1.11684900  |
| H  | 2.05467300  | 3.20808900  | 2.11305700  |
| H  | 0.32955400  | 3.51477500  | 1.84032600  |
| C  | 2.99615900  | 2.88205900  | -0.86880700 |
| H  | 3.80107800  | 2.55006400  | -0.20594500 |
| H  | 3.09568100  | 3.95977700  | -1.04548400 |
| H  | 3.09798500  | 2.34724100  | -1.81775100 |
| C  | 0.16445400  | 3.28162000  | -1.25549900 |
| H  | -0.84960100 | 3.15801500  | -0.86545300 |
| H  | 0.21655300  | 2.79773200  | -2.23546100 |
| H  | 0.38772400  | 4.34843600  | -1.37122000 |
| C  | -2.63677700 | -0.40873200 | 1.73160200  |
| C  | -3.17116700 | 0.85227400  | 2.43691000  |
| C  | -2.07261400 | -1.40957900 | 2.75301600  |
| H  | -2.39513000 | 1.37455800  | 3.00596000  |
| H  | -3.96872400 | 0.56329600  | 3.13003100  |
| H  | -3.58344700 | 1.55199500  | 1.70148100  |
| H  | -2.86662100 | -1.71205700 | 3.44541300  |

|   |             |             |             |
|---|-------------|-------------|-------------|
| H | -1.24788000 | -0.96949400 | 3.32134700  |
| H | -1.70335200 | -2.30231300 | 2.23880400  |
| C | -2.70810700 | -0.41211400 | -1.61883200 |
| C | -3.53206900 | -1.66678300 | -1.96296200 |
| C | -2.19529000 | 0.26768700  | -2.90131800 |
| H | -3.88358100 | -2.14855900 | -1.04846200 |
| H | -2.93609300 | -2.38977300 | -2.52770600 |
| H | -4.39545500 | -1.39560900 | -2.58674800 |
| H | -1.66038300 | 1.18881700  | -2.65285100 |
| H | -3.03779100 | 0.52307200  | -3.56014600 |
| H | -1.52015000 | -0.38401800 | -3.46243800 |
| C | 3.08815200  | -2.08741200 | 0.06159100  |
| C | 3.45496900  | -1.86840800 | 1.54191900  |
| C | 4.22125300  | -1.58481000 | -0.85457200 |
| H | 3.57959800  | -0.80384200 | 1.76722300  |
| H | 4.39650100  | -2.38124800 | 1.78707600  |
| H | 2.66420900  | -2.26822800 | 2.18448600  |
| H | 5.16339600  | -2.10348100 | -0.62509100 |
| H | 4.38449400  | -0.50965200 | -0.72803200 |
| H | 3.96744900  | -1.77696500 | -1.90207400 |
| H | -0.45066900 | 1.15883900  | 2.08688900  |
| H | -0.85132000 | -2.01803700 | -2.10497100 |
| H | 0.82415800  | -3.14504000 | -0.84725900 |
| O | -3.73548000 | -1.08799300 | 1.13009300  |
| H | -4.07379100 | -0.47385500 | 0.44995500  |
| O | -3.57626300 | 0.55122300  | -0.95947600 |
| H | -4.28280000 | 0.76772300  | -1.58940500 |
| O | 2.91791600  | -3.50488000 | -0.16277500 |
| H | 3.75905500  | -3.93216900 | 0.06243200  |

34

G-sol = -1099.576286 Hartree

|   |            |             |             |
|---|------------|-------------|-------------|
| C | 1.40778000 | 1.30876900  | -0.57156600 |
| C | 1.42742100 | 0.15920000  | -1.41923000 |
| C | 1.41107100 | -1.14698200 | -0.84664700 |
| C | 1.42977800 | -1.30653600 | 0.57285500  |
| C | 1.41218800 | -0.15736200 | 1.41719900  |
| C | 1.42557700 | 1.15180600  | 0.84574700  |
| C | 1.41772200 | -0.31583900 | 2.92647900  |
| H | 1.05911000 | 0.58486100  | 3.42692200  |
| H | 0.76974900 | -1.13525100 | 3.24726800  |
| H | 2.42719800 | -0.52243300 | 3.31190300  |
| C | 1.52641400 | 2.36045500  | 1.76063400  |
| H | 0.61635200 | 2.50854700  | 2.35387200  |

|    |             |             |             |
|----|-------------|-------------|-------------|
| H  | 2.35881300  | 2.24756400  | 2.46568700  |
| H  | 1.70543500  | 3.28112400  | 1.20468500  |
| C  | 1.40666100  | 2.69552800  | -1.18839600 |
| H  | 0.75775400  | 3.38032500  | -0.63667200 |
| H  | 2.41429800  | 3.13667900  | -1.20531000 |
| H  | 1.04438700  | 2.67822800  | -2.21732300 |
| C  | 1.53112100  | 0.34775000  | -2.92320600 |
| H  | 0.62255900  | 0.78853700  | -3.35015400 |
| H  | 2.36439200  | 1.01468000  | -3.17552700 |
| H  | 1.71075000  | -0.59347100 | -3.44345600 |
| C  | 1.41716000  | -2.37510500 | -1.73823800 |
| H  | 2.42790900  | -2.61002800 | -2.10354500 |
| H  | 1.05136200  | -3.25678500 | -1.20995700 |
| H  | 0.77522000  | -2.24175900 | -2.61236400 |
| C  | 1.53448000  | -2.70290300 | 1.16218000  |
| H  | 0.62423200  | -3.29130000 | 0.99666700  |
| H  | 2.36557400  | -3.25641100 | 0.70879000  |
| H  | 1.71695100  | -2.68280800 | 2.23695800  |
| Ni | -0.25134300 | -0.00154300 | -0.00051300 |
| P  | -2.34167500 | -0.00238400 | 0.00050500  |
| C  | -3.23161400 | -0.77669100 | 1.44784400  |
| H  | -4.32321200 | -0.72460600 | 1.34369100  |
| H  | -2.93281800 | -1.82634400 | 1.53804900  |
| H  | -2.93760300 | -0.26396100 | 2.36982400  |
| C  | -3.23042000 | 1.63862900  | -0.05204400 |
| H  | -2.93094800 | 2.18419900  | -0.95312700 |
| H  | -4.32210000 | 1.52325300  | -0.05114300 |
| H  | -2.93535200 | 2.23764700  | 0.81594000  |
| C  | -3.23115900 | -0.86904200 | -1.39366600 |
| H  | -4.32270500 | -0.80810200 | -1.29433900 |
| H  | -2.93536100 | -0.42047400 | -2.34791500 |
| H  | -2.93428500 | -1.92300200 | -1.41233000 |

34b

G-sol = -2230.695801 Hartree

|    |             |             |             |
|----|-------------|-------------|-------------|
| C  | 0.00509900  | 1.45779000  | -0.60069000 |
| C  | -1.24181400 | 0.77454900  | -0.68914400 |
| C  | -1.26403900 | -0.64209500 | -0.82394400 |
| C  | -0.04603100 | -1.37491700 | -0.85592000 |
| C  | 1.20013900  | -0.69147400 | -0.76274900 |
| C  | 1.22473100  | 0.73172700  | -0.65791800 |
| Ni | -0.06385700 | -0.10075000 | 0.88469400  |
| P  | -0.15105200 | -0.14662300 | 3.02312000  |
| C  | 0.75933700  | -1.49834200 | 3.91194500  |



|   |             |             |             |
|---|-------------|-------------|-------------|
| H | 0.64697800  | -1.42275500 | 5.00056900  |
| H | 0.38016600  | -2.46952000 | 3.57801500  |
| H | 1.82262100  | -1.44514800 | 3.65682900  |
| C | 0.49868900  | 1.36174300  | 3.88444500  |
| H | -0.03623500 | 2.24195900  | 3.51427900  |
| H | 0.38705600  | 1.29576800  | 4.97372200  |
| H | 1.55716200  | 1.49039500  | 3.63663100  |
| C | -1.84009800 | -0.29840700 | 3.77609800  |
| H | -1.80437500 | -0.28530000 | 4.87248700  |
| H | -2.46351400 | 0.53065600  | 3.42660300  |
| H | -2.30330000 | -1.23174800 | 3.44070500  |
| C | 0.00536500  | 2.95377300  | -0.39386000 |
| O | -0.50264600 | 3.50715700  | 0.55551000  |
| O | 0.63298100  | 3.58020700  | -1.40130600 |
| C | 2.51727100  | 1.49680000  | -0.59811000 |
| O | 2.78035200  | 2.34856200  | 0.22292600  |
| O | 3.33497500  | 1.14546200  | -1.60935300 |
| C | -2.50319600 | 1.58810100  | -0.70763900 |
| O | -2.64823500 | 2.58395900  | -1.38279400 |
| O | -3.44684500 | 1.08579300  | 0.11070000  |
| C | -2.56076800 | -1.40461800 | -0.92298300 |
| O | -2.88842300 | -2.30030700 | -0.17770300 |
| O | -3.29018800 | -0.97621700 | -1.96824700 |
| C | 2.46959600  | -1.48990400 | -0.84926300 |
| O | 2.67817900  | -2.33968900 | -1.68789300 |
| O | 3.34431900  | -1.16011600 | 0.12176900  |
| C | -0.10335900 | -2.86421700 | -1.07128000 |
| O | -0.68671800 | -3.37421000 | -2.00206000 |
| O | 0.55352900  | -3.54289800 | -0.11618900 |
| C | 4.60197600  | -1.85343000 | 0.06765900  |
| H | 5.18402300  | -1.46497000 | 0.90346800  |
| H | 4.44668300  | -2.93005700 | 0.17262500  |
| H | 5.10622500  | -1.65669200 | -0.88231000 |
| C | 4.60035600  | 1.82672400  | -1.63997800 |
| H | 5.12298100  | 1.42945600  | -2.51016800 |
| H | 4.44848000  | 2.90431800  | -1.73937300 |
| H | 5.16303800  | 1.62816900  | -0.72378300 |
| C | 0.63398800  | -4.96321000 | -0.32800900 |
| H | 1.15120900  | -5.35794400 | 0.54665000  |
| H | -0.36715100 | -5.39183400 | -0.41283800 |
| H | 1.20058900  | -5.17204200 | -1.23925000 |
| C | -4.53301500 | -1.67087500 | -2.17129400 |
| H | -4.97652300 | -1.21857400 | -3.05836400 |
| H | -4.34659300 | -2.73544400 | -2.33103100 |
| H | -5.18596800 | -1.54519000 | -1.30327000 |
| C | -4.69976100 | 1.79166900  | 0.10107000  |

|   |             |            |             |
|---|-------------|------------|-------------|
| H | -5.33498700 | 1.26343700 | 0.81209200  |
| H | -4.55151700 | 2.82927600 | 0.40952900  |
| H | -5.13854200 | 1.77354500 | -0.90016100 |
| C | 0.73487800  | 5.00839800 | -1.26245700 |
| H | 1.22330600  | 5.35437300 | -2.17359500 |
| H | -0.25929800 | 5.45014800 | -1.16419400 |
| H | 1.33494900  | 5.25571600 | -0.38283200 |

34c

G-sol = -1443.006086 Hartree

|    |             |             |             |
|----|-------------|-------------|-------------|
| C  | 1.36078900  | -0.39440800 | -0.88969600 |
| C  | 0.39090700  | -0.37836900 | -1.93913800 |
| C  | -0.91440400 | -0.88251700 | -1.79635400 |
| C  | -1.33219600 | -1.41102200 | -0.55619200 |
| C  | -0.37120800 | -1.46749100 | 0.47727200  |
| C  | 0.97809600  | -1.02621600 | 0.35162600  |
| Ni | -0.46983400 | 0.58382900  | -0.22145600 |
| P  | -1.12010000 | 2.47170300  | 0.43809400  |
| C  | -2.47592600 | 2.54295800  | 1.71704800  |
| H  | -2.72812700 | 3.57335800  | 1.99933000  |
| H  | -3.37269600 | 2.05179100  | 1.32516000  |
| H  | -2.15969600 | 1.99412400  | 2.61009400  |
| C  | 0.12036700  | 3.60238300  | 1.24915700  |
| H  | 0.95129900  | 3.78556100  | 0.56065200  |
| H  | -0.32394200 | 4.56251600  | 1.54146900  |
| H  | 0.52737100  | 3.11276300  | 2.13985100  |
| C  | -1.83285900 | 3.65225700  | -0.81995500 |
| H  | -2.15281400 | 4.59924000  | -0.36633200 |
| H  | -1.08259700 | 3.86311300  | -1.58943000 |
| H  | -2.69322800 | 3.18456900  | -1.31034900 |
| H  | -0.69653900 | -1.88491000 | 1.41926400  |
| H  | 0.64848200  | 0.05364900  | -2.89611900 |
| H  | -1.59330900 | -0.82506100 | -2.64102100 |
| C  | 1.84377700  | -1.32534400 | 1.61829000  |
| C  | 1.36172500  | -0.46910800 | 2.80903000  |
| C  | 1.75747000  | -2.82672900 | 1.96332600  |
| H  | 1.50079100  | 0.59368800  | 2.58422200  |
| H  | 0.30305300  | -0.62730500 | 3.03642400  |
| H  | 1.95700900  | -0.72224000 | 3.69348400  |
| H  | 2.05713300  | -3.43187300 | 1.10139900  |
| H  | 2.45574400  | -3.02874300 | 2.78171900  |
| H  | 0.75721400  | -3.13507800 | 2.27646500  |
| C  | 2.74310900  | 0.19903800  | -1.24061100 |
| C  | 3.77068900  | -0.91367900 | -1.53088600 |

|   |             |             |             |
|---|-------------|-------------|-------------|
| C | 2.70653400  | 1.17202200  | -2.43415600 |
| H | 3.43762500  | -1.51808700 | -2.38174100 |
| H | 4.74311500  | -0.47529500 | -1.79572300 |
| H | 3.89495500  | -1.55742200 | -0.65934600 |
| H | 3.67917600  | 1.67569400  | -2.50277300 |
| H | 2.55164400  | 0.66184700  | -3.38942400 |
| H | 1.93310200  | 1.93314000  | -2.29917400 |
| C | -2.72741200 | -2.00382900 | -0.36483100 |
| C | -3.82835300 | -1.09785300 | -0.93972400 |
| C | -2.77939700 | -3.40472000 | -1.00920700 |
| H | -3.74600800 | -0.98318600 | -2.02537600 |
| H | -4.81443800 | -1.53401300 | -0.73191400 |
| H | -3.77531500 | -0.10753000 | -0.47936400 |
| H | -3.77029700 | -3.85712300 | -0.86636900 |
| H | -2.58527200 | -3.35698100 | -2.08612000 |
| H | -2.03016800 | -4.05721000 | -0.55025100 |
| O | 3.23759200  | -1.11530200 | 1.44617600  |
| H | 3.34871800  | -0.20181500 | 1.10954600  |
| O | 3.16907200  | 1.00194900  | -0.10102100 |
| H | 4.04418300  | 1.36381000  | -0.32122300 |
| O | -2.92549500 | -2.13361000 | 1.05136100  |
| H | -3.78890600 | -2.55628500 | 1.18021300  |

35

G-sol = -1099.458022 Hartree

|    |             |             |             |
|----|-------------|-------------|-------------|
| Ni | 0.14390100  | -0.40112900 | -0.39699700 |
| P  | 1.12367300  | 1.49654200  | 0.50351300  |
| C  | -0.08394100 | 2.80215000  | 1.01117300  |
| H  | 0.40346200  | 3.64071200  | 1.52206600  |
| H  | -0.61280900 | 3.17432900  | 0.12848100  |
| H  | -0.82764300 | 2.35142200  | 1.67535300  |
| C  | 2.04481600  | 1.18045300  | 2.07866800  |
| H  | 2.85710900  | 0.47469300  | 1.87863600  |
| H  | 2.46053500  | 2.10390700  | 2.49843800  |
| H  | 1.36880600  | 0.73029500  | 2.81262000  |
| C  | 2.37359600  | 2.47493500  | -0.45894600 |
| H  | 1.93048700  | 2.81784000  | -1.39968900 |
| H  | 2.73263600  | 3.34744000  | 0.10011700  |
| H  | 3.22619300  | 1.83146700  | -0.69791400 |
| C  | -1.13785500 | -1.04253500 | 0.86388200  |
| C  | -2.42651700 | -0.65164200 | 0.73523000  |
| C  | -1.44693400 | 0.34599500  | -1.13050200 |
| C  | -2.61652900 | 0.16788700  | -0.47679700 |
| C  | -3.57236800 | -0.99868100 | 1.65659700  |

|   |             |             |             |
|---|-------------|-------------|-------------|
| H | -4.08214500 | -0.09868000 | 2.02828500  |
| H | -4.33635300 | -1.59860300 | 1.14171200  |
| H | -3.24149600 | -1.57339800 | 2.52670600  |
| C | -0.51761800 | -1.91829200 | 1.91647600  |
| H | -0.36350800 | -2.94809000 | 1.56072000  |
| H | 0.46841200  | -1.55047500 | 2.23531200  |
| H | -1.14054900 | -1.97639300 | 2.82044400  |
| C | -1.17912900 | 1.03312000  | -2.43914100 |
| H | -0.47913400 | 1.87690300  | -2.34146200 |
| H | -0.73566300 | 0.34677300  | -3.17614200 |
| H | -2.10014000 | 1.43125700  | -2.88726800 |
| C | -3.97398800 | 0.69025100  | -0.88420500 |
| H | -4.69218800 | -0.12825700 | -1.03270300 |
| H | -4.40374100 | 1.34529300  | -0.11300300 |
| H | -3.93442100 | 1.26427800  | -1.81465700 |
| C | 1.82220400  | -1.46713000 | -1.23813500 |
| C | 0.57448000  | -2.08919800 | -1.41362000 |
| H | 0.30120700  | -2.95446300 | -0.81333400 |
| H | 0.05052000  | -2.01007200 | -2.36342600 |
| H | 2.20955400  | -0.83213500 | -2.03594400 |
| C | 2.79149100  | -1.87677800 | -0.22358500 |
| C | 4.07857000  | -1.48945400 | -0.15500000 |
| H | 2.42033500  | -2.57994000 | 0.52465300  |
| H | 4.74347800  | -1.85951900 | 0.61948000  |
| H | 4.51107300  | -0.80957500 | -0.88682900 |

TS36

G-sol = -1099.438285 Hartree

|    |             |             |             |
|----|-------------|-------------|-------------|
| Ni | -0.05083600 | 0.04983500  | -0.15713900 |
| P  | -1.79188900 | -1.17191100 | 0.47293000  |
| C  | -1.46158100 | -2.75823700 | 1.36526500  |
| H  | -2.38389300 | -3.18833700 | 1.77271900  |
| H  | -1.00017100 | -3.47978300 | 0.68587900  |
| H  | -0.75897700 | -2.56758600 | 2.18204200  |
| C  | -2.79087800 | -0.23668100 | 1.71732800  |
| H  | -3.14208600 | 0.69507400  | 1.26305400  |
| H  | -3.64984800 | -0.82252000 | 2.06521700  |
| H  | -2.16007800 | 0.01191700  | 2.57704200  |
| C  | -3.07990900 | -1.68066100 | -0.75806000 |
| H  | -2.63067700 | -2.33270400 | -1.51412700 |
| H  | -3.90859300 | -2.21339200 | -0.27715600 |
| H  | -3.47281100 | -0.79108900 | -1.25951000 |
| C  | 1.42057800  | 1.21701600  | 0.45449400  |
| C  | 2.62545900  | 0.57355900  | 0.39592100  |

S60

|   |             |             |             |
|---|-------------|-------------|-------------|
| C | 1.36725400  | -1.21928500 | -0.48297300 |
| C | 2.62021100  | -0.70228800 | -0.31764600 |
| C | 3.86515600  | 1.04712400  | 1.12119500  |
| H | 4.17766200  | 0.33684900  | 1.90061600  |
| H | 4.71295100  | 1.13822900  | 0.42812000  |
| H | 3.72353600  | 2.02324000  | 1.59305100  |
| C | 1.08122500  | 2.27957700  | 1.47416000  |
| H | 1.33321100  | 3.30242800  | 1.14880300  |
| H | 0.00341000  | 2.28077800  | 1.68505600  |
| H | 1.59046100  | 2.09858300  | 2.42780200  |
| C | 1.07034500  | -2.48587200 | -1.24921400 |
| H | 0.19065900  | -2.35451100 | -1.89758500 |
| H | 1.89304800  | -2.81999100 | -1.89752800 |
| H | 0.83325400  | -3.32410300 | -0.57733300 |
| C | 3.92792900  | -1.32929000 | -0.75656200 |
| H | 4.49347500  | -0.66299100 | -1.42376900 |
| H | 4.58184200  | -1.53814200 | 0.10164200  |
| H | 3.77918700  | -2.27497400 | -1.28433900 |
| C | -0.99475500 | 1.57144300  | -1.20091300 |
| C | 0.42169000  | 1.84965300  | -1.18584300 |
| H | 0.71164000  | 2.85629500  | -0.89247900 |
| H | 1.02328500  | 1.46298600  | -2.00578500 |
| H | -1.37247900 | 0.97381300  | -2.03278300 |
| C | -1.96322100 | 2.49163400  | -0.61370200 |
| C | -3.28114100 | 2.54994500  | -0.88789700 |
| H | -1.56230500 | 3.20085900  | 0.11375900  |
| H | -3.93110200 | 3.27577800  | -0.40861200 |
| H | -3.74301200 | 1.89075500  | -1.62116900 |

37

G-sol = -1099.510749 Hartree

|    |            |             |             |
|----|------------|-------------|-------------|
| Ni | 0.52856100 | -0.60246100 | -0.45829500 |
| P  | 2.31709100 | 0.25676800  | 0.48515600  |
| C  | 2.27133400 | 2.03889300  | 0.98320500  |
| H  | 3.20183400 | 2.34068100  | 1.47777200  |
| H  | 2.10988100 | 2.66818900  | 0.10410500  |
| H  | 1.43046400 | 2.19897300  | 1.66434600  |
| C  | 2.80567300 | -0.54107000 | 2.08587900  |
| H  | 3.02471900 | -1.59901800 | 1.91577600  |
| H  | 3.68455700 | -0.05742400 | 2.52800900  |
| H  | 1.97204700 | -0.47650500 | 2.79258300  |
| C  | 3.89766500 | 0.16716800  | -0.48011500 |
| H  | 3.78511400 | 0.72074300  | -1.41767200 |
| H  | 4.74053400 | 0.58692200  | 0.08121900  |

|   |             |             |             |
|---|-------------|-------------|-------------|
| H | 4.11656500  | -0.87653700 | -0.72646800 |
| C | -2.67723200 | -0.56239800 | 0.40365600  |
| C | -2.19564100 | 0.66987300  | 0.68297700  |
| C | -0.35612400 | 1.03318200  | -0.96639400 |
| C | -1.48466300 | 1.47939000  | -0.36670800 |
| C | -2.40205400 | 1.36895800  | 2.01592000  |
| H | -1.49459100 | 1.91615700  | 2.30249700  |
| H | -3.21262400 | 2.10950000  | 1.97097700  |
| H | -2.64107800 | 0.67926100  | 2.82925200  |
| C | -3.47724400 | -1.42262300 | 1.35602900  |
| H | -4.48801700 | -1.59493900 | 0.95728700  |
| H | -3.02641900 | -2.41897500 | 1.47238100  |
| H | -3.59106900 | -0.99245500 | 2.35340100  |
| C | 0.30049900  | 1.74994700  | -2.13311000 |
| H | 1.36928200  | 1.93676400  | -1.95498200 |
| H | 0.26031400  | 1.11808600  | -3.03271000 |
| H | -0.15289300 | 2.71328700  | -2.40211100 |
| C | -2.19065200 | 2.79634400  | -0.67102900 |
| H | -3.21904700 | 2.61959200  | -1.01951900 |
| H | -2.27335300 | 3.42638300  | 0.22507000  |
| H | -1.68199200 | 3.38952900  | -1.43424300 |
| C | -1.02678300 | -1.65743500 | -1.21605700 |
| C | -2.45183400 | -1.18838900 | -0.97167600 |
| H | -3.15039500 | -2.02880900 | -1.10851300 |
| H | -2.69270000 | -0.45597500 | -1.75035900 |
| H | -0.73496800 | -1.73966900 | -2.26640400 |
| C | -0.30749400 | -2.43084900 | -0.27466500 |
| C | 1.07858900  | -2.62478400 | -0.40214200 |
| H | -0.75355000 | -2.59777300 | 0.70672300  |
| H | 1.62135600  | -3.11638600 | 0.40116900  |
| H | 1.53572700  | -2.70946300 | -1.38929200 |

TS38

G-sol = -1099.488256 Hartree

|    |            |             |             |
|----|------------|-------------|-------------|
| Ni | 0.64193800 | -0.73678900 | -0.11523500 |
| P  | 2.47547200 | 0.27759900  | 0.40281200  |
| C  | 2.81130700 | 2.03324100  | -0.11458400 |
| H  | 3.72000700 | 2.43319000  | 0.35122800  |
| H  | 2.92240300 | 2.08146500  | -1.20269900 |
| H  | 1.95906700 | 2.66102800  | 0.16475500  |
| C  | 2.68014200 | 0.42205200  | 2.24387900  |
| H  | 2.65488100 | -0.57697100 | 2.68965400  |
| H  | 3.62369900 | 0.91274000  | 2.51203900  |
| H  | 1.84790500 | 0.99851600  | 2.66023600  |

|   |             |             |             |
|---|-------------|-------------|-------------|
| C | 4.07837200  | -0.53172000 | -0.07209600 |
| H | 4.15718900  | -0.57609800 | -1.16338400 |
| H | 4.94640800  | 0.00874000  | 0.32464200  |
| H | 4.08843600  | -1.55778000 | 0.30799900  |
| C | -2.92718600 | -0.28324700 | 0.45984100  |
| C | -2.26243000 | 0.88290600  | 0.60391500  |
| C | -0.54683000 | 0.48000300  | -1.14899700 |
| C | -1.40558300 | 1.33624600  | -0.53378300 |
| C | -2.38475300 | 1.81235700  | 1.79055600  |
| H | -1.39160200 | 2.04606400  | 2.19833600  |
| H | -2.84047900 | 2.77121500  | 1.50946200  |
| H | -2.98340100 | 1.39127400  | 2.60126600  |
| C | -3.90870400 | -0.87975400 | 1.43493900  |
| H | -4.87128100 | -1.07261300 | 0.93908600  |
| H | -3.55829400 | -1.85305700 | 1.80864900  |
| H | -4.10633200 | -0.24383500 | 2.30084500  |
| C | 0.11004500  | 0.81100400  | -2.47993100 |
| H | 0.62985300  | -0.06044700 | -2.89275300 |
| H | -0.61482500 | 1.14537100  | -3.23717200 |
| H | 0.86054300  | 1.60455100  | -2.37263500 |
| C | -1.64067800 | 2.76103600  | -1.00213300 |
| H | -2.71003200 | 2.95616700  | -1.17000000 |
| H | -1.30820300 | 3.49231400  | -0.25185500 |
| H | -1.10934100 | 2.98525400  | -1.93018200 |
| C | -1.19650800 | -1.37945200 | -1.04091100 |
| C | -2.67721500 | -1.09088600 | -0.81341200 |
| H | -3.22145200 | -2.04431900 | -0.76515200 |
| H | -3.07244600 | -0.54041600 | -1.67905800 |
| H | -0.96331600 | -1.63812400 | -2.07611800 |
| C | -0.58708100 | -2.25809700 | -0.04025600 |
| C | 0.70689400  | -2.80032800 | -0.11807500 |
| H | -1.10439300 | -2.32322100 | 0.91869900  |
| H | 1.06487400  | -3.41406200 | 0.70520800  |
| H | 1.17505300  | -3.01300200 | -1.08039300 |

39

G-sol = -1099.531903 Hartree

|    |             |             |             |
|----|-------------|-------------|-------------|
| Ni | -0.47185500 | -0.50343100 | -0.17789600 |
| P  | -2.49653200 | 0.33737100  | -0.24615200 |
| C  | -3.12637700 | 1.53653900  | 1.03468200  |
| H  | -4.15140200 | 1.86569000  | 0.82326700  |
| H  | -3.10330700 | 1.06545900  | 2.02300900  |
| H  | -2.47262300 | 2.41418300  | 1.06852700  |
| C  | -2.86841500 | 1.30143200  | -1.79382800 |

|   |             |             |             |
|---|-------------|-------------|-------------|
| H | -2.70831700 | 0.66285200  | -2.66818700 |
| H | -3.90056500 | 1.67294400  | -1.80476800 |
| H | -2.18432300 | 2.15303300  | -1.86917800 |
| C | -3.89577000 | -0.88593800 | -0.25322400 |
| H | -3.88629200 | -1.45736500 | 0.68087900  |
| H | -4.87120700 | -0.39529200 | -0.35867000 |
| H | -3.75515600 | -1.59000900 | -1.07885200 |
| C | 2.87133400  | 0.63035600  | -0.52042500 |
| C | 1.84313700  | 1.22644500  | 0.13363700  |
| C | 1.07010200  | -0.94536200 | 1.10496400  |
| C | 1.00095600  | 0.45467100  | 1.10102500  |
| C | 1.50957100  | 2.69692700  | -0.02486200 |
| H | 0.43052500  | 2.83392000  | -0.16633600 |
| H | 1.78993900  | 3.28140600  | 0.86201300  |
| H | 2.00779700  | 3.14836500  | -0.88462600 |
| C | 3.84742900  | 1.31343700  | -1.44468100 |
| H | 4.87905900  | 1.08368100  | -1.13950200 |
| H | 3.74685300  | 0.94181500  | -2.47585000 |
| H | 3.75171300  | 2.40077600  | -1.47101800 |
| C | 0.58997100  | -1.82483500 | 2.23890800  |
| H | 0.25175300  | -2.79688600 | 1.86189200  |
| H | 1.41123700  | -2.02737100 | 2.94573400  |
| H | -0.23338900 | -1.38838200 | 2.81032500  |
| C | 0.48338100  | 1.22798500  | 2.30434300  |
| H | 1.31046600  | 1.52248100  | 2.97062600  |
| H | -0.03068300 | 2.14815300  | 2.01275700  |
| H | -0.22012900 | 0.64262100  | 2.89977000  |
| C | 1.86907000  | -1.63980600 | -0.00546600 |
| C | 3.14121100  | -0.85194500 | -0.32137300 |
| H | 3.61087000  | -1.26663200 | -1.22523900 |
| H | 3.87597500  | -0.98786900 | 0.49038700  |
| H | 2.13357600  | -2.66564300 | 0.28623400  |
| C | 0.88202600  | -1.60398600 | -1.16897800 |
| C | -0.34109600 | -2.27366900 | -1.24230600 |
| H | 1.19409800  | -1.02641300 | -2.04144700 |
| H | -0.87552400 | -2.30334800 | -2.18879300 |
| H | -0.60021400 | -3.07015500 | -0.54409500 |

TS40

G-sol = -943.556297 Hartree

|    |             |             |             |
|----|-------------|-------------|-------------|
| Ni | -0.31717600 | -0.42252100 | -0.10238300 |
| P  | -2.39096000 | -0.05105700 | -0.01079700 |
| C  | 1.97201300  | -0.80222300 | 0.19049900  |
| C  | 1.09361000  | -1.48648700 | -0.92711900 |



|   |             |             |             |
|---|-------------|-------------|-------------|
| H | 1.16854600  | -2.57064600 | -0.81547100 |
| H | 1.45444900  | -1.20706500 | -1.92387900 |
| C | 1.62207300  | 0.74849400  | 0.61936500  |
| C | 0.17356600  | 0.89887700  | 1.13983600  |
| H | 2.32684100  | 0.94220000  | 1.44023400  |
| C | 3.42658900  | -0.85456300 | -0.19234600 |
| C | 4.37157000  | -1.51126900 | 0.48591600  |
| C | -3.40956700 | -1.27439400 | -0.95077600 |
| H | -3.08507700 | -1.28315000 | -1.99551100 |
| H | -3.24212200 | -2.27443100 | -0.53941600 |
| H | -4.47857700 | -1.03430200 | -0.90089400 |
| C | -3.18650900 | -0.06623000 | 1.65866200  |
| H | -4.26886700 | 0.08969000  | 1.58689300  |
| H | -2.99670700 | -1.02898100 | 2.14313400  |
| H | -2.74967600 | 0.72074100  | 2.28023400  |
| C | -2.94370800 | 1.56414300  | -0.72140900 |
| H | -2.62343400 | 1.63049100  | -1.76562400 |
| H | -4.03393400 | 1.66653500  | -0.67472300 |
| H | -2.48057400 | 2.38665100  | -0.16883700 |
| H | 0.05874500  | 0.54273900  | 2.17241500  |
| H | 4.14861400  | -2.05156400 | 1.40451300  |
| H | 5.40233200  | -1.54454200 | 0.14183200  |
| H | 3.68962100  | -0.32792500 | -1.10912900 |
| H | 1.84746300  | -1.37218500 | 1.12148800  |
| C | 1.89685000  | 1.71810100  | -0.50062400 |
| C | 2.83193700  | 2.67016800  | -0.48251800 |
| H | 1.26294800  | 1.61397700  | -1.38395300 |
| H | 2.97651700  | 3.34738300  | -1.32055300 |
| H | 3.49196300  | 2.80555200  | 0.37229700  |
| H | -0.21429700 | 1.91757200  | 1.04673100  |

41

G-sol = -943.5916073 Hartree

|    |             |             |             |
|----|-------------|-------------|-------------|
| Ni | -0.50808000 | 0.61492800  | -0.51677500 |
| P  | -2.56832600 | -0.10219300 | 0.16664000  |
| C  | 2.36531200  | 0.71874100  | -0.55658900 |
| C  | 1.11277700  | 1.34257500  | -1.21308100 |
| H  | 1.09352500  | 1.08466100  | -2.28665400 |
| H  | 1.09424900  | 2.44253800  | -1.12687100 |
| C  | 1.98437800  | -0.78214700 | -0.42916400 |
| C  | 0.56088100  | -0.80345300 | 0.16759700  |
| H  | 1.91910700  | -1.17020900 | -1.45590200 |
| C  | 2.66880300  | 1.37153200  | 0.76714100  |
| C  | 3.83852300  | 1.91775700  | 1.10827100  |

|   |             |             |             |
|---|-------------|-------------|-------------|
| C | -3.99458900 | 1.06093500  | -0.07192600 |
| H | -3.80732100 | 1.99042300  | 0.47578700  |
| H | -4.09692500 | 1.30789900  | -1.13388200 |
| H | -4.93688000 | 0.62658300  | 0.28110400  |
| C | -3.19441800 | -1.64793100 | -0.63995300 |
| H | -4.16532300 | -1.95557000 | -0.23474700 |
| H | -3.29061900 | -1.48456600 | -1.71802200 |
| H | -2.47042900 | -2.45415600 | -0.48572600 |
| C | -2.70911600 | -0.52153800 | 1.96503400  |
| H | -2.48811200 | 0.36708800  | 2.56460400  |
| H | -3.70893700 | -0.88941600 | 2.22293900  |
| H | -1.96986700 | -1.28877000 | 2.21543000  |
| H | 0.06193500  | -1.76933600 | -0.00087300 |
| H | 4.68950600  | 1.91514200  | 0.42934000  |
| H | 3.99203500  | 2.39079900  | 2.07539100  |
| H | 1.84420100  | 1.40880900  | 1.48165900  |
| H | 3.26015800  | 0.81973700  | -1.18944300 |
| C | 2.95082800  | -1.64591400 | 0.33580900  |
| C | 3.49869400  | -2.77640100 | -0.11767500 |
| H | 3.19520600  | -1.30458800 | 1.34308100  |
| H | 4.17878500  | -3.37064000 | 0.48795700  |
| H | 3.29009100  | -3.14979000 | -1.11926800 |
| H | 0.57429300  | -0.60665400 | 1.25139800  |

42

G-sol = -1099.440172 Hartree

|    |             |             |             |
|----|-------------|-------------|-------------|
| Ni | 0.34699100  | -0.31836900 | -0.21119500 |
| P  | 1.99885300  | 1.17772900  | 0.41705900  |
| C  | -2.52709000 | -0.77404200 | -0.43515700 |
| C  | -1.16492900 | -1.35083900 | -0.86478400 |
| H  | -1.06057500 | -1.24508500 | -1.96000200 |
| H  | -1.07138500 | -2.42030000 | -0.62812400 |
| C  | -2.33374400 | 0.75306800  | -0.61408700 |
| C  | -0.98414500 | 1.08598200  | 0.06008000  |
| H  | -2.22008900 | 0.92231400  | -1.69545300 |
| C  | -2.85949100 | -1.16983800 | 0.98015100  |
| C  | -3.94850600 | -1.84248900 | 1.36138300  |
| C  | 3.71093400  | 0.57108400  | 0.80528200  |
| H  | 3.67469000  | -0.10723800 | 1.66407600  |
| H  | 4.10982000  | 0.00922800  | -0.04473200 |
| H  | 4.39233600  | 1.39740500  | 1.03773100  |
| C  | 2.35600900  | 2.47444700  | -0.86133200 |
| H  | 3.08541400  | 3.21231200  | -0.50710300 |
| H  | 2.74524200  | 1.99969600  | -1.76832800 |

|   |             |             |             |
|---|-------------|-------------|-------------|
| H | 1.42613800  | 2.98766800  | -1.12378600 |
| C | 1.64593800  | 2.21658300  | 1.91075500  |
| H | 1.55052700  | 1.57065700  | 2.78993800  |
| H | 2.43922900  | 2.95050700  | 2.09345000  |
| H | 0.69614700  | 2.74041000  | 1.77348300  |
| H | -0.65156600 | 2.09006200  | -0.24539500 |
| H | -4.71005600 | -2.14713300 | 0.64550700  |
| H | -4.12397700 | -2.11423300 | 2.39984400  |
| H | -2.12392200 | -0.89053600 | 1.73701300  |
| H | -3.34802900 | -1.12856100 | -1.07896500 |
| C | -3.47039600 | 1.61138300  | -0.12790700 |
| C | -4.11818100 | 2.52561800  | -0.85500200 |
| H | -3.75911700 | 1.46462900  | 0.91476100  |
| H | -4.91973400 | 3.13150800  | -0.43895600 |
| H | -3.87135600 | 2.70173200  | -1.90121400 |
| H | -1.10780900 | 1.12316800  | 1.15575000  |
| C | 1.49920500  | -2.14511900 | 0.15386000  |
| C | 1.78211700  | -1.80316700 | -0.98932400 |
| C | 2.23687400  | -1.62419000 | -2.37282800 |
| H | 2.92097000  | -2.43148800 | -2.66371300 |
| H | 1.38624100  | -1.63043000 | -3.06337300 |
| H | 2.76243600  | -0.67107000 | -2.50571700 |
| C | 1.25941700  | -2.77073400 | 1.45843400  |
| H | 1.56097500  | -2.11273300 | 2.28179800  |
| H | 0.19330700  | -2.99152100 | 1.58336500  |
| H | 1.82152200  | -3.70903400 | 1.54856700  |

TS43

G-sol = -1099.415056 Hartree

|    |             |             |             |
|----|-------------|-------------|-------------|
| Ni | -0.51218900 | 0.30241700  | -0.07789400 |
| P  | -2.20944300 | -1.05280200 | 0.10200200  |
| C  | 2.38938300  | 0.24505400  | -0.65567700 |
| C  | 1.11866800  | 0.95130400  | -1.15286200 |
| H  | 0.60556900  | 0.35352400  | -1.92523100 |
| H  | 1.34573400  | 1.90680900  | -1.62545600 |
| C  | 1.96446700  | -1.21194700 | -0.33662000 |
| C  | 0.70683500  | -1.14145200 | 0.54853900  |
| H  | 1.67537900  | -1.65996900 | -1.30040800 |
| C  | 3.03100400  | 0.94435800  | 0.51676500  |
| C  | 4.26004400  | 1.46507900  | 0.51595400  |
| C  | -3.92559900 | -0.47285800 | -0.29036900 |
| H  | -4.21825700 | 0.32189200  | 0.40106500  |
| H  | -3.95047400 | -0.06412400 | -1.30526100 |
| H  | -4.65042400 | -1.29213400 | -0.21754800 |

|   |             |             |             |
|---|-------------|-------------|-------------|
| C | -2.10479600 | -2.54282400 | -0.99493700 |
| H | -2.94144600 | -3.22859000 | -0.81746000 |
| H | -2.12633300 | -2.22118400 | -2.04136600 |
| H | -1.16234100 | -3.06761600 | -0.81953100 |
| C | -2.46008700 | -1.80307600 | 1.77623700  |
| H | -2.69617000 | -1.01148000 | 2.49469400  |
| H | -3.27728500 | -2.53364900 | 1.76884800  |
| H | -1.53980300 | -2.29483000 | 2.10199400  |
| H | 0.30406500  | -2.15633400 | 0.66850500  |
| H | 4.89913100  | 1.41885900  | -0.36407800 |
| H | 4.67792600  | 1.95358100  | 1.39283800  |
| H | 2.42896700  | 1.00979800  | 1.42293900  |
| H | 3.12698500  | 0.24367700  | -1.47466400 |
| C | 3.06084400  | -2.06280000 | 0.24888700  |
| C | 3.49571400  | -3.21882400 | -0.25937100 |
| H | 3.50107600  | -1.69507600 | 1.17702000  |
| H | 4.27052100  | -3.80629400 | 0.22721600  |
| H | 3.09100200  | -3.62442000 | -1.18573400 |
| H | 0.96941100  | -0.80269400 | 1.56565700  |
| C | -1.37309400 | 2.01934700  | -0.21153000 |
| C | -0.11913100 | 2.27604700  | -0.05026500 |
| C | 0.79301000  | 3.37248500  | 0.38811300  |
| H | 0.19585500  | 4.27993400  | 0.55012900  |
| H | 1.29848000  | 3.13009400  | 1.32901200  |
| H | 1.57432900  | 3.60618000  | -0.34296600 |
| C | -2.65442000 | 2.78160900  | -0.14940400 |
| H | -3.27409400 | 2.60680400  | -1.03768800 |
| H | -3.25536800 | 2.47706300  | 0.71693600  |
| H | -2.48655000 | 3.86552400  | -0.06923100 |

44

G-sol = -1099.451889 Hartree

|    |             |             |             |
|----|-------------|-------------|-------------|
| Ni | -0.75803100 | 0.48714500  | -0.59558000 |
| P  | -2.87753000 | 0.43277300  | 0.25275700  |
| C  | 2.44815500  | -0.04313100 | 0.81613100  |
| C  | 1.26811700  | -0.89354400 | 1.38164000  |
| H  | 0.54347700  | -0.20188300 | 1.83456100  |
| H  | 1.66672000  | -1.50733800 | 2.20017500  |
| C  | 1.94291400  | 1.24837300  | 0.08784200  |
| C  | 0.98927200  | 0.98462400  | -1.09650400 |
| H  | 1.38948400  | 1.81656400  | 0.85190400  |
| C  | 3.37424600  | -0.87928600 | -0.03240300 |
| C  | 4.65739700  | -1.12367600 | 0.24394000  |
| C  | -4.23289300 | -0.40508400 | -0.69635000 |

|   |             |             |             |
|---|-------------|-------------|-------------|
| H | -4.36179600 | 0.08628900  | -1.66602800 |
| H | -3.95997000 | -1.44881500 | -0.87948900 |
| H | -5.18419700 | -0.37724600 | -0.15204800 |
| C | -2.96394900 | -0.43401900 | 1.88557100  |
| H | -3.99068000 | -0.49612600 | 2.26447000  |
| H | -2.55258700 | -1.44170100 | 1.77382200  |
| H | -2.34472400 | 0.10016200  | 2.61303300  |
| C | -3.65881400 | 2.07192500  | 0.63994800  |
| H | -3.78171100 | 2.64979800  | -0.28203300 |
| H | -4.63916300 | 1.95301400  | 1.11561700  |
| H | -3.00717600 | 2.64091400  | 1.31116700  |
| H | 0.68382700  | 1.96332300  | -1.53507900 |
| H | 5.14102000  | -0.71305500 | 1.12868800  |
| H | 5.27598200  | -1.74125200 | -0.40299100 |
| H | 2.93485700  | -1.31359900 | -0.92984600 |
| H | 3.02754400  | 0.31395100  | 1.67951500  |
| C | 3.10344800  | 2.11402400  | -0.34629400 |
| C | 3.35757200  | 3.34329500  | 0.10882600  |
| H | 3.76012100  | 1.67889900  | -1.10048200 |
| H | 4.19867100  | 3.92912200  | -0.25394800 |
| H | 2.73103100  | 3.81360200  | 0.86573200  |
| H | 1.48115700  | 0.41978500  | -1.89745800 |
| C | -0.22097700 | -1.29576400 | -0.58798200 |
| C | 0.58115200  | -1.80254600 | 0.36649600  |
| C | 0.94627100  | -3.26941800 | 0.50920400  |
| H | 0.46960000  | -3.91426500 | -0.23363000 |
| H | 2.03381300  | -3.40580800 | 0.42371400  |
| H | 0.66634300  | -3.64539600 | 1.50428300  |
| C | -0.76857500 | -2.04589800 | -1.78084600 |
| H | -1.83848300 | -1.86001000 | -1.93994800 |
| H | -0.26161900 | -1.71682400 | -2.69872600 |
| H | -0.63373400 | -3.13299400 | -1.70541200 |

TS45

G-sol = -1099.451348 Hartree

|    |             |             |             |
|----|-------------|-------------|-------------|
| Ni | -0.90931200 | 0.31261900  | -0.46287800 |
| P  | -2.94733600 | 0.32315100  | 0.27172100  |
| C  | 2.51483800  | 0.11677300  | 0.89970800  |
| C  | 1.48051500  | -0.91431400 | 1.42931200  |
| H  | 0.69179300  | -0.36504600 | 1.96351500  |
| H  | 1.97612600  | -1.55448800 | 2.16947400  |
| C  | 1.78398800  | 1.21723900  | 0.06550700  |
| C  | 0.89636800  | 0.65566700  | -1.05982700 |
| H  | 1.12614400  | 1.73829100  | 0.77575500  |

|   |             |             |             |
|---|-------------|-------------|-------------|
| C | 3.63147300  | -0.56665600 | 0.14971900  |
| C | 4.92036100  | -0.52902400 | 0.49450900  |
| C | -4.13115700 | -0.78379400 | -0.63345400 |
| H | -4.19478400 | -0.47386200 | -1.68117500 |
| H | -3.75831300 | -1.81251600 | -0.60693700 |
| H | -5.13338200 | -0.75495100 | -0.18896500 |
| C | -3.18822000 | -0.25157500 | 2.02023600  |
| H | -4.24881800 | -0.27659300 | 2.29841300  |
| H | -2.76276700 | -1.25368100 | 2.13156200  |
| H | -2.65576300 | 0.41847400  | 2.70266200  |
| C | -3.89718700 | 1.92192300  | 0.29052600  |
| H | -3.96112000 | 2.32171300  | -0.72651200 |
| H | -4.91124100 | 1.78963100  | 0.68720800  |
| H | -3.36722800 | 2.65475500  | 0.90755600  |
| H | 0.27418600  | 1.48607800  | -1.49815400 |
| H | 5.26402400  | 0.02823000  | 1.36426200  |
| H | 5.68262900  | -1.05269700 | -0.07723000 |
| H | 3.33647900  | -1.13939900 | -0.72977500 |
| H | 2.95949300  | 0.63020900  | 1.76380000  |
| C | 2.74665200  | 2.24164400  | -0.48704100 |
| C | 2.76060800  | 3.53389200  | -0.15334200 |
| H | 3.47149200  | 1.87009100  | -1.21205300 |
| H | 3.47198700  | 4.23121500  | -0.58856600 |
| H | 2.05939200  | 3.94530900  | 0.57113700  |
| H | 1.47332200  | 0.25143300  | -1.89545600 |
| C | 0.18373200  | -1.20381900 | -0.68889300 |
| C | 0.89407500  | -1.76984800 | 0.31694300  |
| C | 1.23590000  | -3.24186900 | 0.39186500  |
| H | 0.83260800  | -3.82348200 | -0.44113100 |
| H | 2.32596300  | -3.39347400 | 0.41828400  |
| H | 0.84443800  | -3.68414100 | 1.31980300  |
| C | -0.19878800 | -1.93169700 | -1.96907000 |
| H | -1.19578800 | -2.38476100 | -1.89291500 |
| H | -0.23770100 | -1.23570000 | -2.81407000 |
| H | 0.50867000  | -2.72849000 | -2.23590300 |

46

G-sol = -1099.505543 Hartree

|    |             |             |             |
|----|-------------|-------------|-------------|
| Ni | 1.01751200  | -0.43491900 | -0.01586200 |
| P  | 2.97389600  | 0.45437000  | -0.21834600 |
| C  | -2.57158400 | 0.11204500  | -0.92272700 |
| C  | -1.49077600 | -0.89493500 | -1.37891100 |
| H  | -0.82756300 | -0.39885200 | -2.10512100 |
| H  | -1.97847200 | -1.70838800 | -1.93552600 |

S70

|   |             |             |             |
|---|-------------|-------------|-------------|
| C | -1.93090800 | 1.11094000  | 0.08539700  |
| C | -1.42749400 | 0.35396700  | 1.33042600  |
| H | -1.05621400 | 1.54731900  | -0.41890500 |
| C | -3.77289900 | -0.60995000 | -0.36019100 |
| C | -5.02795100 | -0.45523500 | -0.78736300 |
| C | 3.84209200  | 0.83402100  | 1.37859700  |
| H | 3.24677100  | 1.54626800  | 1.95831400  |
| H | 3.93970000  | -0.08300500 | 1.96756000  |
| H | 4.83839400  | 1.25841300  | 1.20376300  |
| C | 4.25818600  | -0.56708700 | -1.09146100 |
| H | 5.22947400  | -0.05812600 | -1.11953600 |
| H | 4.37101000  | -1.52707500 | -0.57833600 |
| H | 3.93281000  | -0.76910000 | -2.11693300 |
| C | 3.15744100  | 2.07648300  | -1.10958800 |
| H | 2.54423700  | 2.83629300  | -0.61481400 |
| H | 4.20070900  | 2.41537900  | -1.12872700 |
| H | 2.79758200  | 1.97151100  | -2.13816000 |
| H | -0.82341400 | 1.03687900  | 1.94330600  |
| H | -5.27718100 | 0.23724000  | -1.58947800 |
| H | -5.85437600 | -1.01407400 | -0.35522400 |
| H | -3.57548800 | -1.32124400 | 0.44289500  |
| H | -2.90494000 | 0.68563300  | -1.79753000 |
| C | -2.86481600 | 2.23048300  | 0.46131600  |
| C | -2.62758300 | 3.52687700  | 0.25273400  |
| H | -3.80025800 | 1.93001300  | 0.93521500  |
| H | -3.33835300 | 4.29502300  | 0.54710200  |
| H | -1.71112900 | 3.87177900  | -0.22364500 |
| H | -2.29133600 | 0.08308900  | 1.96305300  |
| C | -0.62755500 | -0.91015200 | 1.03382500  |
| C | -0.66360500 | -1.50594500 | -0.24118400 |
| C | -0.27959800 | -2.95367600 | -0.50050500 |
| H | 0.42796700  | -3.35579200 | 0.22832400  |
| H | -1.17308900 | -3.59978200 | -0.49073300 |
| H | 0.17490300  | -3.05980200 | -1.49434200 |
| C | -0.25417600 | -1.66415300 | 2.29973700  |
| H | 0.22455200  | -0.99173000 | 3.02244700  |
| H | -1.15583700 | -2.06914700 | 2.78917400  |
| H | 0.42813800  | -2.49863600 | 2.12457600  |
